# Supplementary material for: Regulatory mechanisms of fatty acids biosynthesis in Armeniaca sibirica seed kernel oil at different developmental stages
Source: PeerJ. 2022 Oct 4;10:e14125. doi: 10.7717/peerj.14125 (PMC9541615; doi:10.7717/peerj.14125)
Supplement: Supplemental Information 10 [file peerj-10-14125-s010.xlsx]

## Sheet: Sheet1
Table S10 Detailed information of unigenes in the transcriptome of Armeniaca sibirica matching the 20 top species using BLAST against the Nr database.
Rank	Species	Gene_number	Gene_id
1	Prunus mume	6144	transcript_HQ_sequal2_transcript14530/f11p0/805;transcript_HQ_sequal2_transcript14531/f4p0/844;transcript_HQ_sequal2_transcript10904/f2p0/1124;transcript_HQ_sequal2_transcript1272/f4p0/2360;transcript_HQ_sequal2_transcript10905/f6p0/1136;transcript_HQ_sequal2_transcript1181/f4p0/2383;transcript_HQ_sequal2_transcript10/f2p0/4305;transcript_HQ_sequal2_transcript13627/f7p0/820;transcript_HQ_sequal2_…
ranscript12990/f2p0/932;transcript_HQ_sequal2_transcript1405/f2p0/2311;transcript_HQ_sequal2_transcript11239/f2p0/1128;transcript_HQ_sequal2_transcript10340/f2p0/1215;transcript_HQ_sequal2_transcript14054/f4p0/862;transcript_HQ_sequal2_transcript12995/f3p0/949;transcript_HQ_sequal2_transcript10343/f3p0/1196;transcript_HQ_sequal2_transcript10344/f3p0/1183;transcript_HQ_sequal2_transcript14059/f2p0…
ript1441/f2p0/2280;transcript_HQ_sequal2_transcript15232/f3p0/781;transcript_HQ_sequal2_transcript14410/f2p0/840;transcript_HQ_sequal2_transcript10690/f10p0/1150;transcript_HQ_sequal2_transcript14411/f2p0/839;transcript_HQ_sequal2_transcript15234/f2p0/779;transcript_HQ_sequal2_transcript10691/f6p0/1114;transcript_HQ_sequal2_transcript1341/f3p0/2326;transcript_HQ_sequal2_transcript1251/f3p0/2350;t…
7/f20p0/570;transcript_HQ_sequal2_transcript19347/f3p0/473;transcript_HQ_sequal2_transcript16608/f3p0/676;transcript_HQ_sequal2_transcript203/f2p0/3138;transcript_HQ_sequal2_transcript18422/f16p0/536;transcript_HQ_sequal2_transcript2030/f3p0/2136;transcript_HQ_sequal2_transcript15786/f3p0/741;transcript_HQ_sequal2_transcript17533/f3p0/633;transcript_HQ_sequal2_transcript17534/f2p0/606;transcript_…
pt23/f2p0/3985;transcript_HQ_sequal2_transcript407/f8p0/2847;transcript_HQ_sequal2_transcript3162/f4p0/1939;transcript_HQ_sequal2_transcript4070/f2p0/1820;transcript_HQ_sequal2_transcript230/f14p0/3066;transcript_HQ_sequal2_transcript2302/f4p0/2074;transcript_HQ_sequal2_transcript2156/f5p0/2092;transcript_HQ_sequal2_transcript2305/f6p0/2063;transcript_HQ_sequal2_transcript17189/f6p0/621;transcrip…
0/1503;transcript_HQ_sequal2_transcript2574/f2p0/2026;transcript_HQ_sequal2_transcript3377/f3p0/1934;transcript_HQ_sequal2_transcript6986/f10p0/1496;transcript_HQ_sequal2_transcript3378/f3p0/1903;transcript_HQ_sequal2_transcript434/f3p0/2837;transcript_HQ_sequal2_transcript3379/f3p0/1920;transcript_HQ_sequal2_transcript6988/f3p0/1491;transcript_HQ_sequal2_transcript6989/f7p0/1460;transcript_HQ_se…
f2p0/1980;transcript_HQ_sequal2_transcript3624/f2p0/1875;transcript_HQ_sequal2_transcript3625/f5p0/1899;transcript_HQ_sequal2_transcript2819/f2p0/2008;transcript_HQ_sequal2_transcript6326/f2p0/1580;transcript_HQ_sequal2_transcript4595/f4p0/1756;transcript_HQ_sequal2_transcript282/f2p0/3014;transcript_HQ_sequal2_transcript3628/f2p0/1894;transcript_HQ_sequal2_transcript5477/f11p0/1651;transcript_HQ…
0/1635;transcript_HQ_sequal2_transcript4866/f10p0/1753;transcript_HQ_sequal2_transcript3081/f2p0/1939;transcript_HQ_sequal2_transcript6596/f8p0/1545;transcript_HQ_sequal2_transcript7593/f12p0/1447;transcript_HQ_sequal2_transcript5749/f2p0/1606;transcript_HQ_sequal2_transcript6598/f2p0/1558;transcript_HQ_sequal2_transcript7595/f3p0/1445;transcript_HQ_sequal2_transcript387/f2p0/2869;transcript_HQ_s…
539;transcript_HQ_sequal2_transcript8900/f2p0/1310;transcript_HQ_sequal2_transcript9811/f4p0/1229;transcript_HQ_sequal2_transcript8902/f5p0/1303;transcript_HQ_sequal2_transcript8/f2p0/4322;transcript_HQ_sequal2_transcript8903/f2p0/1258;transcript_HQ_sequal2_transcript8904/f2p0/1307;transcript_HQ_sequal2_transcript9814/f11p0/1155;transcript_HQ_sequal2_transcript80/f2p0/3569;transcript_HQ_sequal2_t…
2	Prunus persica	3267	transcript_HQ_sequal2_transcript11806/f10p0/1029;transcript_HQ_sequal2_transcript0/f2p0/4629;transcript_HQ_sequal2_transcript11809/f2p0/1072;transcript_HQ_sequal2_transcript13625/f2p0/908;transcript_HQ_sequal2_transcript12720/f21p0/963;transcript_HQ_sequal2_transcript12722/f2p0/972;transcript_HQ_sequal2_transcript11810/f4p0/1054;transcript_HQ_sequal2_transcript13629/f8p0/855;transcript_HQ_sequal2…
2_transcript15139/f13p0/722;transcript_HQ_sequal2_transcript1243/f2p0/2379;transcript_HQ_sequal2_transcript11530/f5p0/1068;transcript_HQ_sequal2_transcript13329/f2p0/936;transcript_HQ_sequal2_transcript11534/f4p0/1072;transcript_HQ_sequal2_transcript15142/f10p0/786;transcript_HQ_sequal2_transcript11537/f2p0/1079;transcript_HQ_sequal2_transcript15145/f3p0/795;transcript_HQ_sequal2_transcript15146/…
al2_transcript16763/f2p0/672;transcript_HQ_sequal2_transcript17720/f7p0/604;transcript_HQ_sequal2_transcript16769/f5p0/668;transcript_HQ_sequal2_transcript15943/f3p0/731;transcript_HQ_sequal2_transcript18605/f3p0/522;transcript_HQ_sequal2_transcript17733/f9p0/594;transcript_HQ_sequal2_transcript17734/f2p0/597;transcript_HQ_sequal2_transcript15950/f6p0/745;transcript_HQ_sequal2_transcript15951/f6p…
equal2_transcript2616/f2p0/2014;transcript_HQ_sequal2_transcript2617/f2p0/2021;transcript_HQ_sequal2_transcript6127/f2p0/1585;transcript_HQ_sequal2_transcript4379/f4p0/1780;transcript_HQ_sequal2_transcript438/f3p0/2827;transcript_HQ_sequal2_transcript7037/f2p0/1508;transcript_HQ_sequal2_transcript6132/f3p0/1629;transcript_HQ_sequal2_transcript7040/f3p0/1526;transcript_HQ_sequal2_transcript2623/f2…
script6720/f2p0/1541;transcript_HQ_sequal2_transcript9520/f11p0/1206;transcript_HQ_sequal2_transcript9523/f3p0/1241;transcript_HQ_sequal2_transcript7750/f2p0/1433;transcript_HQ_sequal2_transcript8628/f2p0/1329;transcript_HQ_sequal2_transcript3976/f2p0/1832;transcript_HQ_sequal2_transcript863/f2p0/2543;transcript_HQ_sequal2_transcript8631/f2p0/1336;transcript_HQ_sequal2_transcript398/f2p0/2860;tra…
3	Malus domestica	43	transcript_HQ_sequal2_transcript100/f4p0/3453;transcript_HQ_sequal2_transcript1012/f8p0/2485;transcript_HQ_sequal2_transcript11954/f2p0/1031;transcript_HQ_sequal2_transcript14825/f5p0/823;transcript_HQ_sequal2_transcript14869/f5p0/809;transcript_HQ_sequal2_transcript14897/f5p0/817;transcript_HQ_sequal2_transcript14152/f7p0/848;transcript_HQ_sequal2_transcript13263/f4p0/924;transcript_HQ_sequal2_t…
4	Pyrus bretschneideri	30	transcript_HQ_sequal2_transcript1021/f2p0/2445;transcript_HQ_sequal2_transcript10240/f2p0/1183;transcript_HQ_sequal2_transcript11176/f2p0/1107;transcript_HQ_sequal2_transcript14021/f2p0/872;transcript_HQ_sequal2_transcript11271/f2p0/1093;transcript_HQ_sequal2_transcript11325/f3p0/1086;transcript_HQ_sequal2_transcript10590/f2p0/1172;transcript_HQ_sequal2_transcript14359/f3p0/839;transcript_HQ_sequ…
5	Prunus dulcis	20	transcript_HQ_sequal2_transcript13855/f61p0/836;transcript_HQ_sequal2_transcript14005/f2p0/855;transcript_HQ_sequal2_transcript15223/f74p0/737;transcript_HQ_sequal2_transcript15831/f3p0/744;transcript_HQ_sequal2_transcript1779/f5p0/2065;transcript_HQ_sequal2_transcript17891/f2p0/580;transcript_HQ_sequal2_transcript1796/f3p0/2190;transcript_HQ_sequal2_transcript19064/f2p0/487;transcript_HQ_sequal2…
6	Prunus armeniaca	20	transcript_HQ_sequal2_transcript14570/f6p0/714;transcript_HQ_sequal2_transcript12045/f2p0/1025;transcript_HQ_sequal2_transcript15004/f2p0/789;transcript_HQ_sequal2_transcript15039/f2p0/794;transcript_HQ_sequal2_transcript10578/f29p0/1044;transcript_HQ_sequal2_transcript11575/f2p0/1074;transcript_HQ_sequal2_transcript1350/f2p0/2317;transcript_HQ_sequal2_transcript1838/f5p0/2173;transcript_HQ_sequa…
7	Glycine max	15	transcript_HQ_sequal2_transcript14736/f3p0/813;transcript_HQ_sequal2_transcript13886/f58p0/821;transcript_HQ_sequal2_transcript14051/f3p0/865;transcript_HQ_sequal2_transcript10448/f3p0/1174;transcript_HQ_sequal2_transcript12532/f3p0/980;transcript_HQ_sequal2_transcript10719/f13p0/1114;transcript_HQ_sequal2_transcript19193/f2p0/484;transcript_HQ_sequal2_transcript16614/f3p0/676;transcript_HQ_sequa…
8	Vitis vinifera	12	transcript_HQ_sequal2_transcript13442/f2p0/911;transcript_HQ_sequal2_transcript13534/f7p0/890;transcript_HQ_sequal2_transcript11696/f3p0/1055;transcript_HQ_sequal2_transcript19378/f7p0/461;transcript_HQ_sequal2_transcript15817/f2p0/736;transcript_HQ_sequal2_transcript18471/f2p0/536;transcript_HQ_sequal2_transcript17597/f13p0/594;transcript_HQ_sequal2_transcript19485/f3p0/453;transcript_HQ_sequal2…
9	Fragaria vesca	12	transcript_HQ_sequal2_transcript13712/f2p0/900;transcript_HQ_sequal2_transcript11513/f2p0/1071;transcript_HQ_sequal2_transcript15147/f2p0/782;transcript_HQ_sequal2_transcript20355/f2p0/426;transcript_HQ_sequal2_transcript5021/f15p0/1687;transcript_HQ_sequal2_transcript6917/f4p0/1511;transcript_HQ_sequal2_transcript7117/f2p0/1498;transcript_HQ_sequal2_transcript6223/f2p0/1595;transcript_HQ_sequal2…
10	Theobroma cacao	12	transcript_HQ_sequal2_transcript11854/f2p0/1047;transcript_HQ_sequal2_transcript14105/f2p0/852;transcript_HQ_sequal2_transcript20155/f5p0/407;transcript_HQ_sequal2_transcript17573/f6p0/608;transcript_HQ_sequal2_transcript17793/f4p0/590;transcript_HQ_sequal2_transcript17850/f2p0/582;transcript_HQ_sequal2_transcript5118/f3p0/1697;transcript_HQ_sequal2_transcript6059/f2p0/1622;transcript_HQ_sequal2_…
11	Prunus sibirica	12	transcript_HQ_sequal2_transcript1649/f2p0/2245;transcript_HQ_sequal2_transcript17436/f2p0/611;transcript_HQ_sequal2_transcript2052/f5p0/2130;transcript_HQ_sequal2_transcript2325/f13p0/2062;transcript_HQ_sequal2_transcript2190/f33p0/2082;transcript_HQ_sequal2_transcript4188/f3p0/1808;transcript_HQ_sequal2_transcript4540/f2p0/1762;transcript_HQ_sequal2_transcript2793/f2p0/1998;transcript_HQ_sequal2…
12	Prunus salicina	12	transcript_HQ_sequal2_transcript14062/f16p0/822;transcript_HQ_sequal2_transcript15399/f5p0/775;transcript_HQ_sequal2_transcript16452/f2p0/687;transcript_HQ_sequal2_transcript18390/f3p0/541;transcript_HQ_sequal2_transcript17643/f2p0/609;transcript_HQ_sequal2_transcript17785/f3p0/587;transcript_HQ_sequal2_transcript16039/f2p0/730;transcript_HQ_sequal2_transcript16127/f6p0/675;transcript_HQ_sequal2_…
13	Gossypium raimondii	11	transcript_HQ_sequal2_transcript1039/f2p0/2448;transcript_HQ_sequal2_transcript14335/f5p0/829;transcript_HQ_sequal2_transcript15491/f45p0/741;transcript_HQ_sequal2_transcript15436/f5p0/768;transcript_HQ_sequal2_transcript17325/f4p0/608;transcript_HQ_sequal2_transcript16711/f4p0/660;transcript_HQ_sequal2_transcript17745/f33p0/557;transcript_HQ_sequal2_transcript19676/f2p0/438;transcript_HQ_sequal2…
14	Brassica napus	7	transcript_HQ_sequal2_transcript15389/f34p0/746;transcript_HQ_sequal2_transcript1843/f2p0/2200;transcript_HQ_sequal2_transcript2236/f3p0/2082;transcript_HQ_sequal2_transcript163/f10p0/3235;transcript_HQ_sequal2_transcript2359/f10p0/2049;transcript_HQ_sequal2_transcript219/f2p0/3105;transcript_HQ_sequal2_transcript9026/f2p0/1297;
15	Populus trichocarpa	7	transcript_HQ_sequal2_transcript14546/f3p0/901;transcript_HQ_sequal2_transcript11108/f2p0/1112;transcript_HQ_sequal2_transcript14031/f6p0/869;transcript_HQ_sequal2_transcript19057/f4p0/496;transcript_HQ_sequal2_transcript3294/f7p0/1899;transcript_HQ_sequal2_transcript5577/f2p0/1665;transcript_HQ_sequal2_transcript853/f2p0/2580;
16	Medicago truncatula	7	transcript_HQ_sequal2_transcript15549/f5p0/761;transcript_HQ_sequal2_transcript2029/f2p0/2145;transcript_HQ_sequal2_transcript15836/f2p0/739;transcript_HQ_sequal2_transcript17609/f2p0/602;transcript_HQ_sequal2_transcript19988/f2p0/404;transcript_HQ_sequal2_transcript2334/f2p0/2062;transcript_HQ_sequal2_transcript9785/f3p0/1223;
17	Capsella rubella	6	transcript_HQ_sequal2_transcript14011/f2p0/862;transcript_HQ_sequal2_transcript14887/f4p0/791;transcript_HQ_sequal2_transcript18400/f5p0/538;transcript_HQ_sequal2_transcript16638/f35p0/660;transcript_HQ_sequal2_transcript17030/f13p0/647;transcript_HQ_sequal2_transcript18035/f4p0/585;
18	Ananas comosus	6	transcript_HQ_sequal2_transcript20098/f2p0/404;transcript_HQ_sequal2_transcript20118/f2p0/398;transcript_HQ_sequal2_transcript20389/f2p0/372;transcript_HQ_sequal2_transcript18685/f2p0/519;transcript_HQ_sequal2_transcript17975/f4p0/588;transcript_HQ_sequal2_transcript7398/f96p0/1388;
19	Nicotiana tabacum	5	transcript_HQ_sequal2_transcript17345/f6p0/624;transcript_HQ_sequal2_transcript16898/f4p0/596;transcript_HQ_sequal2_transcript17839/f2p0/557;transcript_HQ_sequal2_transcript4884/f3p0/1720;transcript_HQ_sequal2_transcript8594/f2p0/1313;
20	Eucalyptus grandis	5	transcript_HQ_sequal2_transcript20013/f3p0/417;transcript_HQ_sequal2_transcript19497/f9p0/451;transcript_HQ_sequal2_transcript18542/f10p0/519;transcript_HQ_sequal2_transcript6195/f2p0/1582;transcript_HQ_sequal2_transcript9426/f6p0/1271;
