# Supplementary material for: Regulatory mechanisms of fatty acids biosynthesis in Armeniaca sibirica seed kernel oil at different developmental stages
Source: PeerJ. 2022 Oct 4;10:e14125. doi: 10.7717/peerj.14125 (PMC9541615; doi:10.7717/peerj.14125)
Supplement: Supplemental Information 11 [file peerj-10-14125-s011.xlsx]

## Sheet: Sheet1
Table S11 Detailed information of KOG annotation of Armeniaca sibirica transcriptome.
Functional_class	Class_description	Gene_number	Gene_id
A	RNA processing and modification	276	transcript_HQ_sequal2_transcript14547/f3p0/829;transcript_HQ_sequal2_transcript1002/f6p0/2474;transcript_HQ_sequal2_transcript13656/f4p0/904;transcript_HQ_sequal2_transcript13663/f3p0/915;transcript_HQ_sequal2_transcript1373/f2p0/2339;transcript_HQ_sequal2_transcript12844/f4p0/961;transcript_HQ_sequal2_transcript11926/f2p0/1033;transcript_HQ_sequal2_transcript11016/f2p0/1110;transcript_HQ_sequal2…
B	Chromatin structure and dynamics	90	transcript_HQ_sequal2_transcript1369/f2p0/2313;transcript_HQ_sequal2_transcript11850/f2p0/1067;transcript_HQ_sequal2_transcript11864/f2p0/1070;transcript_HQ_sequal2_transcript1374/f5p0/2313;transcript_HQ_sequal2_transcript13740/f2p0/896;transcript_HQ_sequal2_transcript11929/f3p0/1038;transcript_HQ_sequal2_transcript14704/f19p0/794;transcript_HQ_sequal2_transcript14708/f8p0/827;transcript_HQ_sequa…
C	Energy production and conversion	359	transcript_HQ_sequal2_transcript1/f2p0/4576;transcript_HQ_sequal2_transcript13627/f7p0/820;transcript_HQ_sequal2_transcript12730/f3p0/978;transcript_HQ_sequal2_transcript14553/f9p0/849;transcript_HQ_sequal2_transcript10025/f3p0/1211;transcript_HQ_sequal2_transcript14572/f5p0/824;transcript_HQ_sequal2_transcript12785/f6p0/967;transcript_HQ_sequal2_transcript10061/f8p0/1194;transcript_HQ_sequal2_tr…
D	Cell cycle control, cell division, chromosome partitioning	115	transcript_HQ_sequal2_transcript1091/f2p0/2421;transcript_HQ_sequal2_transcript14547/f3p0/829;transcript_HQ_sequal2_transcript13708/f2p0/887;transcript_HQ_sequal2_transcript10115/f6p0/1171;transcript_HQ_sequal2_transcript13795/f8p0/885;transcript_HQ_sequal2_transcript11139/f2p0/1099;transcript_HQ_sequal2_transcript14845/f3p0/806;transcript_HQ_sequal2_transcript14054/f4p0/862;transcript_HQ_sequal2…
E	Amino acid transport and metabolism	281	transcript_HQ_sequal2_transcript1181/f4p0/2383;transcript_HQ_sequal2_transcript14546/f3p0/901;transcript_HQ_sequal2_transcript10012/f3p0/1217;transcript_HQ_sequal2_transcript11869/f8p0/1005;transcript_HQ_sequal2_transcript1189/f2p0/2374;transcript_HQ_sequal2_transcript1378/f4p0/2301;transcript_HQ_sequal2_transcript1103/f11p0/2445;transcript_HQ_sequal2_transcript1199/f2p0/2373;transcript_HQ_sequal…
F	Nucleotide transport and metabolism	70	transcript_HQ_sequal2_transcript13631/f19p0/869;transcript_HQ_sequal2_transcript11824/f4p0/945;transcript_HQ_sequal2_transcript12766/f3p0/967;transcript_HQ_sequal2_transcript11050/f4p0/1119;transcript_HQ_sequal2_transcript11103/f2p0/1103;transcript_HQ_sequal2_transcript12935/f2p0/974;transcript_HQ_sequal2_transcript10210/f2p0/1187;transcript_HQ_sequal2_transcript13939/f3p0/898;transcript_HQ_sequa…
G	Carbohydrate transport and metabolism	349	transcript_HQ_sequal2_transcript1272/f4p0/2360;transcript_HQ_sequal2_transcript1004/f2p0/2458;transcript_HQ_sequal2_transcript1189/f2p0/2374;transcript_HQ_sequal2_transcript1192/f2p0/2373;transcript_HQ_sequal2_transcript10117/f2p0/1201;transcript_HQ_sequal2_transcript11021/f2p0/1112;transcript_HQ_sequal2_transcript11981/f2p0/1037;transcript_HQ_sequal2_transcript11982/f8p0/962;transcript_HQ_sequal…
H	Coenzyme transport and metabolism	69	transcript_HQ_sequal2_transcript10012/f3p0/1217;transcript_HQ_sequal2_transcript13659/f2p0/897;transcript_HQ_sequal2_transcript11029/f2p0/1117;transcript_HQ_sequal2_transcript1199/f2p0/2373;transcript_HQ_sequal2_transcript11079/f2p0/1114;transcript_HQ_sequal2_transcript1020/f2p0/2450;transcript_HQ_sequal2_transcript10225/f5p0/1177;transcript_HQ_sequal2_transcript11167/f2p0/1110;transcript_HQ_sequ…
I	Lipid transport and metabolism	247	transcript_HQ_sequal2_transcript0/f2p0/4629;transcript_HQ_sequal2_transcript10905/f6p0/1136;transcript_HQ_sequal2_transcript10017/f2p0/1203;transcript_HQ_sequal2_transcript1461/f2p0/2301;transcript_HQ_sequal2_transcript11878/f2p0/1040;transcript_HQ_sequal2_transcript10096/f4p0/1189;transcript_HQ_sequal2_transcript1380/f11p0/2311;transcript_HQ_sequal2_transcript11047/f2p0/1131;transcript_HQ_sequal…
J	Translation, ribosomal structure and biogenesis	533	transcript_HQ_sequal2_transcript11806/f10p0/1029;transcript_HQ_sequal2_transcript11817/f4p0/1052;transcript_HQ_sequal2_transcript13640/f13p0/807;transcript_HQ_sequal2_transcript14548/f2p0/827;transcript_HQ_sequal2_transcript12746/f16p0/959;transcript_HQ_sequal2_transcript13651/f4p0/906;transcript_HQ_sequal2_transcript11826/f4p0/1051;transcript_HQ_sequal2_transcript12762/f5p0/975;transcript_HQ_seq…
K	Transcription	361	transcript_HQ_sequal2_transcript10008/f5p0/1181;transcript_HQ_sequal2_transcript14554/f4p0/817;transcript_HQ_sequal2_transcript10026/f2p0/1196;transcript_HQ_sequal2_transcript12757/f5p0/898;transcript_HQ_sequal2_transcript137/f3p0/3303;transcript_HQ_sequal2_transcript1095/f3p0/2448;transcript_HQ_sequal2_transcript11864/f2p0/1070;transcript_HQ_sequal2_transcript13720/f2p0/891;transcript_HQ_sequal2…
L	Replication, recombination and repair	95	transcript_HQ_sequal2_transcript1374/f5p0/2313;transcript_HQ_sequal2_transcript12862/f2p0/979;transcript_HQ_sequal2_transcript12878/f2p0/961;transcript_HQ_sequal2_transcript11121/f2p0/1129;transcript_HQ_sequal2_transcript1483/f2p0/2314;transcript_HQ_sequal2_transcript1297/f5p0/2329;transcript_HQ_sequal2_transcript12988/f2p0/948;transcript_HQ_sequal2_transcript10384/f2p0/1172;transcript_HQ_sequal2…
M	Cell wall/membrane/envelope biogenesis	89	transcript_HQ_sequal2_transcript13634/f2p0/904;transcript_HQ_sequal2_transcript1480/f6p0/2275;transcript_HQ_sequal2_transcript14829/f2p0/813;transcript_HQ_sequal2_transcript13984/f5p0/879;transcript_HQ_sequal2_transcript105/f6p0/3368;transcript_HQ_sequal2_transcript114/f2p0/3378;transcript_HQ_sequal2_transcript13214/f2p0/934;transcript_HQ_sequal2_transcript1329/f2p0/2318;transcript_HQ_sequal2_tra…
N	Cell motility	1	transcript_HQ_sequal2_transcript10/f2p0/4305;
O	Posttranslational modification, protein turnover, chaperones	911	transcript_HQ_sequal2_transcript100/f4p0/3453;transcript_HQ_sequal2_transcript1273/f2p0/2348;transcript_HQ_sequal2_transcript10006/f5p0/1159;transcript_HQ_sequal2_transcript10013/f2p0/1221;transcript_HQ_sequal2_transcript1182/f4p0/2400;transcript_HQ_sequal2_transcript13649/f3p0/897;transcript_HQ_sequal2_transcript10015/f4p0/1211;transcript_HQ_sequal2_transcript13655/f2p0/911;transcript_HQ_sequal2…
470;transcript_HQ_sequal2_transcript6483/f4p0/1553;transcript_HQ_sequal2_transcript7455/f2p0/1452;transcript_HQ_sequal2_transcript3766/f2p0/1854;transcript_HQ_sequal2_transcript2984/f2p0/1932;transcript_HQ_sequal2_transcript7466/f3p0/1462;transcript_HQ_sequal2_transcript3770/f4p0/1862;transcript_HQ_sequal2_transcript5645/f3p0/1638;transcript_HQ_sequal2_transcript2989/f2p0/1954;transcript_HQ_sequa…
P	Inorganic ion transport and metabolism	147	transcript_HQ_sequal2_transcript13650/f2p0/897;transcript_HQ_sequal2_transcript1367/f2p0/2329;transcript_HQ_sequal2_transcript13675/f11p0/866;transcript_HQ_sequal2_transcript13684/f2p0/894;transcript_HQ_sequal2_transcript13704/f4p0/903;transcript_HQ_sequal2_transcript11871/f4p0/1032;transcript_HQ_sequal2_transcript10067/f4p0/1199;transcript_HQ_sequal2_transcript13724/f2p0/904;transcript_HQ_sequal…
Q	Secondary metabolites biosynthesis, transport and catabolism	192	transcript_HQ_sequal2_transcript11837/f2p0/1044;transcript_HQ_sequal2_transcript11866/f5p0/1046;transcript_HQ_sequal2_transcript1461/f2p0/2301;transcript_HQ_sequal2_transcript13730/f3p0/880;transcript_HQ_sequal2_transcript10083/f3p0/1193;transcript_HQ_sequal2_transcript12846/f3p0/970;transcript_HQ_sequal2_transcript11955/f9p0/1057;transcript_HQ_sequal2_transcript10144/f3p0/1185;transcript_HQ_sequ…
R	General function prediction only	969	transcript_HQ_sequal2_transcript0/f2p0/4629;transcript_HQ_sequal2_transcript12720/f21p0/963;transcript_HQ_sequal2_transcript12724/f4p0/973;transcript_HQ_sequal2_transcript12726/f4p0/979;transcript_HQ_sequal2_transcript13632/f3p0/872;transcript_HQ_sequal2_transcript12731/f2p0/973;transcript_HQ_sequal2_transcript10005/f11p0/1211;transcript_HQ_sequal2_transcript12738/f9p0/968;transcript_HQ_sequal2_t…
f2p0/1853;transcript_HQ_sequal2_transcript6515/f3p0/1547;transcript_HQ_sequal2_transcript4779/f4p0/1765;transcript_HQ_sequal2_transcript3804/f5p0/1850;transcript_HQ_sequal2_transcript3807/f2p0/1861;transcript_HQ_sequal2_transcript3813/f2p0/1840;transcript_HQ_sequal2_transcript5689/f15p0/1617;transcript_HQ_sequal2_transcript5691/f2p0/1639;transcript_HQ_sequal2_transcript4806/f2p0/1785;transcript_H…
S	Function unknown	421	transcript_HQ_sequal2_transcript10914/f2p0/1128;transcript_HQ_sequal2_transcript13638/f2p0/907;transcript_HQ_sequal2_transcript13662/f3p0/906;transcript_HQ_sequal2_transcript11831/f2p0/936;transcript_HQ_sequal2_transcript14586/f2p0/824;transcript_HQ_sequal2_transcript11847/f2p0/1058;transcript_HQ_sequal2_transcript10938/f2p0/1134;transcript_HQ_sequal2_transcript10940/f6p0/1124;transcript_HQ_sequa…
T	Signal transduction mechanisms	514	transcript_HQ_sequal2_transcript1001/f3p0/2459;transcript_HQ_sequal2_transcript10030/f4p0/1209;transcript_HQ_sequal2_transcript10037/f5p0/1203;transcript_HQ_sequal2_transcript10932/f7p0/1154;transcript_HQ_sequal2_transcript12792/f2p0/988;transcript_HQ_sequal2_transcript1186/f2p0/2374;transcript_HQ_sequal2_transcript1280/f10p0/2366;transcript_HQ_sequal2_transcript11881/f7p0/1026;transcript_HQ_sequ…
U	Intracellular trafficking, secretion, and vesicular transport	367	transcript_HQ_sequal2_transcript11809/f2p0/1072;transcript_HQ_sequal2_transcript13629/f8p0/855;transcript_HQ_sequal2_transcript10915/f7p0/1131;transcript_HQ_sequal2_transcript13639/f2p0/904;transcript_HQ_sequal2_transcript10042/f3p0/1194;transcript_HQ_sequal2_transcript11849/f2p0/1070;transcript_HQ_sequal2_transcript11859/f3p0/1017;transcript_HQ_sequal2_transcript14604/f5p0/826;transcript_HQ_sequ…
V	Defense mechanisms	62	transcript_HQ_sequal2_transcript10010/f2p0/1176;transcript_HQ_sequal2_transcript10050/f9p0/1200;transcript_HQ_sequal2_transcript10073/f4p0/1214;transcript_HQ_sequal2_transcript10076/f2p0/1198;transcript_HQ_sequal2_transcript11059/f5p0/1102;transcript_HQ_sequal2_transcript10173/f6p0/1157;transcript_HQ_sequal2_transcript1479/f12p0/2262;transcript_HQ_sequal2_transcript11196/f4p0/1106;transcript_HQ_s…
W	Extracellular structures	18	transcript_HQ_sequal2_transcript1329/f2p0/2318;transcript_HQ_sequal2_transcript12638/f2p0/997;transcript_HQ_sequal2_transcript18693/f2p0/542;transcript_HQ_sequal2_transcript497/f3p0/2806;transcript_HQ_sequal2_transcript5002/f2p0/1716;transcript_HQ_sequal2_transcript502/f2p0/2762;transcript_HQ_sequal2_transcript6046/f2p0/1595;transcript_HQ_sequal2_transcript5261/f2p0/1712;transcript_HQ_sequal2_tra…
X	Unnamed protein	1	transcript_HQ_sequal2_transcript17591/f2p0/606;
Y	Nuclear structure	23	transcript_HQ_sequal2_transcript11849/f2p0/1070;transcript_HQ_sequal2_transcript1395/f3p0/2306;transcript_HQ_sequal2_transcript1486/f2p0/2230;transcript_HQ_sequal2_transcript10705/f4p0/1165;transcript_HQ_sequal2_transcript1165/f2p0/2427;transcript_HQ_sequal2_transcript17318/f2p0/627;transcript_HQ_sequal2_transcript16479/f3p0/693;transcript_HQ_sequal2_transcript1653/f2p0/2242;transcript_HQ_sequal2…
Z	Cytoskeleton	119	transcript_HQ_sequal2_transcript14542/f4p0/830;transcript_HQ_sequal2_transcript10147/f2p0/1195;transcript_HQ_sequal2_transcript12003/f2p0/1015;transcript_HQ_sequal2_transcript11111/f4p0/1135;transcript_HQ_sequal2_transcript12119/f2p0/1036;transcript_HQ_sequal2_transcript14054/f4p0/862;transcript_HQ_sequal2_transcript1125/f3p0/2396;transcript_HQ_sequal2_transcript14939/f2p0/802;transcript_HQ_sequa…
