# Supplementary material for: Regulatory mechanisms of fatty acids biosynthesis in Armeniaca sibirica seed kernel oil at different developmental stages
Source: PeerJ. 2022 Oct 4;10:e14125. doi: 10.7717/peerj.14125 (PMC9541615; doi:10.7717/peerj.14125)
Supplement: Supplemental Information 12 [file peerj-10-14125-s012.xlsx]

## Sheet: Sheet1
Table S12 Detailed information of GO annotation of Armeniaca sibirica transcriptome
## Total annotated genes: 6719
#GO ID (Lev2)	GO Term (Lev2)	GO Term (Lev1)	Gene Number
GO:0002376	immune system process	Biological Process	19
GO:0048518	positive regulation of biological process	Biological Process	42
GO:0040007	growth	Biological Process	5
GO:0022414	reproductive process	Biological Process	47
GO:0032502	developmental process	Biological Process	70
GO:0044848	biological phase	Biological Process	1
GO:0098754	detoxification	Biological Process	3
GO:0048511	rhythmic process	Biological Process	2
GO:0000003	reproduction	Biological Process	52
GO:0040011	locomotion	Biological Process	34
GO:0022610	biological adhesion	Biological Process	34
GO:0050789	regulation of biological process	Biological Process	877
GO:0065007	biological regulation	Biological Process	910
GO:0007610	behavior	Biological Process	1
GO:0048519	negative regulation of biological process	Biological Process	37
GO:0071840	cellular component organization or biogenesis	Biological Process	438
GO:0051704	multi-organism process	Biological Process	150
GO:0023052	signaling	Biological Process	280
GO:0009987	cellular process	Biological Process	3166
GO:0032501	multicellular organismal process	Biological Process	73
GO:0044699	single-organism process	Biological Process	2336
GO:0008152	metabolic process	Biological Process	3240
GO:0051179	localization	Biological Process	884
GO:0050896	response to stimulus	Biological Process	629
GO:0001071	nucleic acid binding transcription factor activity	Molecular Function	176
GO:0000988	transcription factor activity, protein binding	Molecular Function	73
GO:0016209	antioxidant activity	Molecular Function	33
GO:0016530	metallochaperone activity	Molecular Function	1
GO:0003824	catalytic activity	Molecular Function	2895
GO:0060089	molecular transducer activity	Molecular Function	81
GO:0098772	molecular function regulator	Molecular Function	113
GO:0005488	binding	Molecular Function	3641
GO:0005215	transporter activity	Molecular Function	318
GO:0005198	structural molecule activity	Molecular Function	300
GO:0019012	virion	Cellular Component	80
GO:0005623	cell	Cellular Component	1600
GO:0044423	virion part	Cellular Component	80
GO:0044464	cell part	Cellular Component	1600
GO:0031974	membrane-enclosed lumen	Cellular Component	153
GO:0032991	macromolecular complex	Cellular Component	969
GO:0044425	membrane part	Cellular Component	753
GO:0043226	organelle	Cellular Component	1178
GO:0044215	other organism	Cellular Component	9
GO:0030054	cell junction	Cellular Component	1
GO:0031012	extracellular matrix	Cellular Component	34
GO:0044421	extracellular region part	Cellular Component	63
GO:0016020	membrane	Cellular Component	806
GO:0005576	extracellular region	Cellular Component	76
GO:0044217	other organism part	Cellular Component	9
GO:0044422	organelle part	Cellular Component	578
