# Supplementary material for: Regulatory mechanisms of fatty acids biosynthesis in Armeniaca sibirica seed kernel oil at different developmental stages
Source: PeerJ. 2022 Oct 4;10:e14125. doi: 10.7717/peerj.14125 (PMC9541615; doi:10.7717/peerj.14125)
Supplement: Supplemental Information 13 [file peerj-10-14125-s013.xlsx]

## Sheet: Sheet1
Table S13 Detailed information of KEGG functional classification and pathway enrichment analysis of unigenes of Armeniaca sibirica seed kernels.
KO_Pathway_Level2	KO_Pathway_Level3	Reads_Num
Amino acid metabolism	Alanine, aspartate and glutamate metabolism	35
Amino acid metabolism	Arginine and proline metabolism	30
Amino acid metabolism	Arginine biosynthesis	21
Amino acid metabolism	Cysteine and methionine metabolism	47
Amino acid metabolism	Glycine, serine and threonine metabolism	38
Amino acid metabolism	Histidine metabolism	8
Amino acid metabolism	Lysine biosynthesis	7
Amino acid metabolism	Lysine degradation	16
Amino acid metabolism	Phenylalanine metabolism	18
Amino acid metabolism	Phenylalanine, tyrosine and tryptophan biosynthesis	17
Amino acid metabolism	Tryptophan metabolism	11
Amino acid metabolism	Tyrosine metabolism	19
Amino acid metabolism	Valine, leucine and isoleucine biosynthesis	10
Amino acid metabolism	Valine, leucine and isoleucine degradation	26
Biosynthesis of other secondary metabolites	Flavonoid biosynthesis	17
Biosynthesis of other secondary metabolites	Isoquinoline alkaloid biosynthesis	10
Biosynthesis of other secondary metabolites	Monobactam biosynthesis	5
Biosynthesis of other secondary metabolites	Phenylpropanoid biosynthesis	38
Biosynthesis of other secondary metabolites	Stilbenoid, diarylheptanoid and gingerol biosynthesis	9
Biosynthesis of other secondary metabolites	Tropane, piperidine and pyridine alkaloid biosynthesis	11
Carbohydrate metabolism	Amino sugar and nucleotide sugar metabolism	52
Carbohydrate metabolism	Ascorbate and aldarate metabolism	25
Carbohydrate metabolism	Butanoate metabolism	14
Carbohydrate metabolism	C5-Branched dibasic acid metabolism	4
Carbohydrate metabolism	Citrate cycle (TCA cycle)	43
Carbohydrate metabolism	Fructose and mannose metabolism	34
Carbohydrate metabolism	Galactose metabolism	23
Carbohydrate metabolism	Glycolysis / Gluconeogenesis	72
Carbohydrate metabolism	Glyoxylate and dicarboxylate metabolism	45
Carbohydrate metabolism	Inositol phosphate metabolism	17
Carbohydrate metabolism	Pentose and glucuronate interconversions	29
Carbohydrate metabolism	Pentose phosphate pathway	26
Carbohydrate metabolism	Propanoate metabolism	22
Carbohydrate metabolism	Pyruvate metabolism	68
Carbohydrate metabolism	Starch and sucrose metabolism	66
Cell growth and death	Cell cycle - Caulobacter	9
Energy metabolism	Carbon fixation in photosynthetic organisms	39
Energy metabolism	Nitrogen metabolism	12
Energy metabolism	Oxidative phosphorylation	82
Energy metabolism	Photosynthesis	13
Energy metabolism	Sulfur metabolism	15
Environmental adaptation	Circadian rhythm - plant	14
Environmental adaptation	Plant-pathogen interaction	37
Folding, sorting and degradation	Proteasome	34
Folding, sorting and degradation	Protein export	24
Folding, sorting and degradation	Protein processing in endoplasmic reticulum	155
Folding, sorting and degradation	RNA degradation	42
Folding, sorting and degradation	SNARE interactions in vesicular transport	15
Folding, sorting and degradation	Sulfur relay system	1
Folding, sorting and degradation	Ubiquitin mediated proteolysis	68
Glycan biosynthesis and metabolism	Glycosaminoglycan degradation	3
Glycan biosynthesis and metabolism	N-Glycan biosynthesis	27
Glycan biosynthesis and metabolism	Other glycan degradation	7
Lipid metabolism	alpha-Linolenic acid metabolism	24
Lipid metabolism	Arachidonic acid metabolism	9
Lipid metabolism	Biosynthesis of unsaturated fatty acids	23
Lipid metabolism	Cutin, suberine and wax biosynthesis	10
Lipid metabolism	Ether lipid metabolism	8
Lipid metabolism	Fatty acid biosynthesis	36
Lipid metabolism	Fatty acid degradation	25
Lipid metabolism	Fatty acid elongation	7
Lipid metabolism	Glycerolipid metabolism	27
Lipid metabolism	Glycerophospholipid metabolism	30
Lipid metabolism	Linoleic acid metabolism	8
Lipid metabolism	Sphingolipid metabolism	8
Lipid metabolism	Steroid biosynthesis	13
Metabolism of cofactors and vitamins	Biotin metabolism	12
Metabolism of cofactors and vitamins	Folate biosynthesis	7
Metabolism of cofactors and vitamins	Nicotinate and nicotinamide metabolism	6
Metabolism of cofactors and vitamins	One carbon pool by folate	14
Metabolism of cofactors and vitamins	Pantothenate and CoA biosynthesis	15
Metabolism of cofactors and vitamins	Porphyrin and chlorophyll metabolism	12
Metabolism of cofactors and vitamins	Thiamine metabolism	3
Metabolism of cofactors and vitamins	Ubiquinone and other terpenoid-quinone biosynthesis	13
Metabolism of cofactors and vitamins	Vitamin B6 metabolism	5
Metabolism of other amino acids	beta-Alanine metabolism	27
Metabolism of other amino acids	Cyanoamino acid metabolism	24
Metabolism of other amino acids	Glutathione metabolism	34
Metabolism of other amino acids	Selenocompound metabolism	8
Metabolism of other amino acids	Taurine and hypotaurine metabolism	5
Metabolism of terpenoids and polyketides	Carotenoid biosynthesis	6
Metabolism of terpenoids and polyketides	Diterpenoid biosynthesis	9
Metabolism of terpenoids and polyketides	Limonene and pinene degradation	5
Metabolism of terpenoids and polyketides	Terpenoid backbone biosynthesis	15
Nucleotide metabolism	Purine metabolism	61
Nucleotide metabolism	Pyrimidine metabolism	46
Replication and repair	Base excision repair	9
Replication and repair	DNA replication	7
Replication and repair	Homologous recombination	10
Replication and repair	Mismatch repair	7
Replication and repair	Nucleotide excision repair	17
Signal transduction	Plant hormone signal transduction	87
Transcription	Basal transcription factors	10
Transcription	RNA polymerase	19
Transcription	Spliceosome	111
Translation	Aminoacyl-tRNA biosynthesis	26
Translation	mRNA surveillance pathway	60
Translation	Ribosome	212
Translation	Ribosome biogenesis in eukaryotes	44
Translation	RNA transport	103
Transport and catabolism	Endocytosis	67
Transport and catabolism	Peroxisome	42
Transport and catabolism	Phagosome	51
