# Supplementary material for: Regulatory mechanisms of fatty acids biosynthesis in Armeniaca sibirica seed kernel oil at different developmental stages
Source: PeerJ. 2022 Oct 4;10:e14125. doi: 10.7717/peerj.14125 (PMC9541615; doi:10.7717/peerj.14125)
Supplement: Supplemental Information 15 [file peerj-10-14125-s015.xlsx]

## Sheet: Sheet1
Table S15 FPKM of genes encoding enzymes involved in the biosynthesis of fatty acids in Armeniaca sibirica seed kernels at different developmental stages.
		FPKM values					The raw data for FPKM values
Gene ID	Enzyme	SⅠ	SⅡ	SⅢ	SⅣ	SⅤ	SⅠ-1	SⅠ-2	SⅠ-3	SⅡ-1	SⅡ-2	SⅡ-3	SⅢ-1	SⅢ-2	SⅢ-3	SⅣ-1	SⅣ-2	SⅣ-3	SⅤ-1	SⅤ-2	SⅤ-3
transcript_HQ_sequal2_transcript2052/f5p0/2130	BC	117.657	111.283	56.0767	55.89	10.8333	116.73	115.92	120.32	108.94	112.6	112.31	57.12	57.05	54.06	56.66	56.25	54.76	11.76	9.78	10.96
transcript_HQ_sequal2_transcript289/f3p0/2970	CT	120.78	125.607	70.8767	60.8667	10.0833	117.17	116.33	128.84	122.72	124.64	129.46	68.4	74.16	70.07	59.15	60.89	62.56	9.07	10.99	10.19
transcript_HQ_sequal2_transcript8964/f2p0/1299	BCCP1	26.6167	21.9667	12.5167	12.88	8.96	27.05	29.72	23.08	19.78	23.07	23.05	12.43	12.66	12.46	13.44	11.44	13.76	10.75	8.87	7.26
transcript_HQ_sequal2_transcript7610/f6p0/1443	BCCP2	83.83	85.06	43.2567	47.75	11.3433	83.45	81.19	86.85	85.41	85.44	84.33	42.74	46.8	40.23	45.93	47.29	50.03	9.66	12.99	11.38
transcript_HQ_sequal2_transcript6230/f11p0/1599	MAT	79.3967	110.963	56.03	48.7233	9.61667	80.27	75.53	82.39	109.28	109.14	114.47	52.64	61.23	54.22	49.71	47.38	49.08	9.62	10.41	8.82
transcript_HQ_sequal2_transcript3474/f3p0/1889	KASⅠ-1	106.497	135.84	40.7333	18.5467	3.12333	105.92	101.67	111.9	131.44	134.94	141.14	38.68	41.88	41.64	19.12	18.58	17.94	3.2	3.27	2.9
transcript_HQ_sequal2_transcript9590/f2p0/1248	KASⅠ-2	34.9533	64.3867	23.8667	5.98667	0.413333	31.96	33.96	38.94	62.21	65.16	65.79	24.01	23.47	24.12	6.62	5.26	6.08	0.58	0.3	0.36
transcript_HQ_sequal2_transcript783/f10p0/2609	KASⅡ	89.03	52.9167	27.6767	27.6733	17.4533	90.1	85.4	91.59	51.92	53.76	53.07	28.32	27.02	27.69	27.49	28.09	27.44	16.96	17.22	18.18
transcript_HQ_sequal2_transcript8442/f3p0/1375	KASⅢ	49.4367	55.8167	15.77	9.52667	5.77	50.55	50.34	47.42	52.2	59.38	55.87	15.61	16.37	15.33	11.3	8.48	8.8	5.83	6.1	5.38
transcript_HQ_sequal2_transcript5648/f4p0/1655	KAR-1	180.767	323.913	167.167	112.113	9.15	176.39	171.41	194.5	315.72	320.45	335.57	164.54	164.94	172.02	118.8	110.35	107.19	9.66	8.17	9.62
transcript_HQ_sequal2_transcript12753/f2p0/969	KAR-2	74.0933	131.253	56.1667	59.56	41.9367	73.93	75.65	72.7	133.72	129.39	130.65	58.75	58.29	51.46	60.83	63.07	54.78	41.72	38.16	45.93
transcript_HQ_sequal2_transcript9034/f2p0/1302	HAD	124.957	114.963	43.88	40.7233	25.31	121.06	127.55	126.26	113.75	112.38	118.76	48.48	43.07	40.09	43.54	39.63	39	25.24	28.45	22.24
transcript_HQ_sequal2_transcript6508/f8p0/1507	EAR	102.417	156.48	62.17	39.1133	4.70333	101.7	100.31	105.24	150.05	157.98	161.41	58.97	64.17	63.37	41.8	39.09	36.45	4.23	4.73	5.15
transcript_HQ_sequal2_transcript3009/f2p0/1966	FATB	62.4467	17.4867	7.33667	7.81333	17.2233	61.11	62.18	64.05	17.21	17.89	17.36	7.3	6.99	7.72	8.04	7.12	8.28	17.07	17.48	17.12
transcript_HQ_sequal2_transcript934/f6p0/2482	LACS8	176.9	48.47	29.0767	38.6233	40.6167	180.52	178.9	171.28	51.27	47.93	46.21	27.13	30.12	29.98	38.11	36.27	41.49	39.87	41.54	40.44
transcript_HQ_sequal2_transcript6382/f3p0/1566	SAD6	3.54333	323.903	655.383	638.263	47.26	2.34	2.71	5.58	299.4	312.16	360.15	691.79	652.05	622.31	710.14	611.19	593.46	41.92	47.67	52.19
transcript_HQ_sequal2_transcript6597/f8p0/1547	FATA	50.5067	81.6367	39.19	24.06	3.86667	49.76	47.73	54.03	84.64	80.06	80.21	37.47	39.26	40.84	23.03	25.68	23.47	3.81	4.04	3.75
transcript_HQ_sequal2_transcript4263/f3p0/1806	LPCAT	69.4033	35.0433	23.1133	20.6567	12.69	71.33	71.28	65.6	36.56	35.2	33.37	22.61	24.61	22.12	20.71	19.46	21.8	11.24	14.66	12.17
transcript_HQ_sequal2_transcript7624/f7p0/1443	FAD2	146.35	301.607	306.473	320.713	83.7433	137.93	139.53	161.59	290.99	302.8	311.03	302.93	304.39	312.1	320.3	315.64	326.2	82.87	82.86	85.5
Three biological replicates were performed for each developmental stage
