# Supplementary material for: Regulatory mechanisms of fatty acids biosynthesis in Armeniaca sibirica seed kernel oil at different developmental stages
Source: PeerJ. 2022 Oct 4;10:e14125. doi: 10.7717/peerj.14125 (PMC9541615; doi:10.7717/peerj.14125)
Supplement: Supplemental Information 16 [file peerj-10-14125-s016.xlsx]

## Sheet: sequal2.tf_stat
Table S16 The identification result of transcription factor families and transcription factor numbers in Armeniaca sibirica seed kernels at different developmental stages.
TF Family	TF Number
C3H	36
AP2/ERF-ERF	36
bHLH	28
NAC	26
C2H2	25
bZIP	24
MYB-related	21
MADS-MIKC	17
GNAT	16
GRAS	15
MYB	15
B3	14
Others	14
Trihelix	12
mTERF	10
AUX/IAA	10
HMG	10
TRAF	10
SWI/SNF-BAF60b	10
SET	9
HSF	9
Tify	9
HB-HD-ZIP	9
GARP-G2-like	9
TCP	8
NF-YA	8
NF-YB	7
WRKY	7
VOZ	7
