# Supplementary material for: Regulatory mechanisms of fatty acids biosynthesis in Armeniaca sibirica seed kernel oil at different developmental stages
Source: PeerJ. 2022 Oct 4;10:e14125. doi: 10.7717/peerj.14125 (PMC9541615; doi:10.7717/peerj.14125)
Supplement: Supplemental Information 17 [file peerj-10-14125-s017.xlsx]

## Sheet: Sheet1
Table S17 Overview of differentially expressed transcription factors co-expressed with the major lipid-related genes in Armeniaca sibirica seed kernels.
TF	Family	TF_ID	FPKM values					The raw data for FPKM values
			SⅠ	SⅡ	SⅢ	SⅣ	SⅤ	SⅠ-1	SⅠ-2	SⅠ-3	SⅡ-1	SⅡ-2	SⅡ-3	SⅢ-1	SⅢ-2	SⅢ-3	SⅣ-1	SⅣ-2	SⅣ-3	SⅤ-1	SⅤ-2	SⅤ-3
bZIP67	bZIP	transcript_HQ_sequal2_transcript6744/f2p0/1532	6.47	82.9633	76.7733	85.9967	23.07	5.39	5.86	8.16	81.63	81.12	86.14	74.55	77.32	78.45	85.4	82.69	89.9	24.07	22.1	23.04
AREB3	bZIP	transcript_HQ_sequal2_transcript6783/f8p0/1519	112.433	126.69	78.0233	47.7867	10.89	107.45	110.97	118.88	124.21	127.06	128.8	77.62	80.64	75.81	47.02	49.36	46.98	10.24	11.66	10.77
NF-YA5-1	NF-YA	transcript_HQ_sequal2_transcript8672/f3p0/1337	37.7233	76.6967	37.34	34.8967	22.8933	35.35	36.51	41.31	77.75	78.19	74.15	40.67	38.78	32.57	32.61	36.07	36.01	21.96	23.49	23.23
NF-YA3	NF-YA	transcript_HQ_sequal2_transcript4243/f2p0/1749	34.16	56.84	23.3233	13.7067	6.31667	30.69	31.74	40.05	54.93	58.4	57.19	22.71	25.25	22.01	14.28	14.24	12.6	5.13	6.66	7.16
NF-YA5-2	NF-YA	transcript_HQ_sequal2_transcript967/f2p0/2477	12.2067	17.6867	8.16333	8.91667	5.19667	10.73	11.07	14.82	16.53	18.19	18.34	7.47	8.95	8.07	9.91	8.13	8.71	4.9	5.7	4.99
NF-YB6	NF-YB	transcript_HQ_sequal2_transcript10744/f16p0/1107	280.35	381.68	214.033	54.2933	4.1	258.8	260.13	322.12	387.57	371.8	385.67	213.15	225.65	203.3	54.37	55.08	53.43	3.76	4.41	4.13
bHLH14	bHLH	transcript_HQ_sequal2_transcript3337/f3p0/1886	26.4533	49.7467	11.0333	4.15667	0.253333	21.82	26.9	30.64	55.38	53.97	39.89	10.36	10.12	12.62	3.75	4.05	4.67	0	0.6	0.16
bHLH71	bHLH	transcript_HQ_sequal2_transcript9093/f7p0/1217	63.27	74.1233	15.96	1.06333	0.213333	61.05	60.22	68.54	72.35	76.33	73.69	15.08	16.85	15.95	0.89	1.04	1.26	0.33	0.15	0.16
TCP15	TCP	transcript_HQ_sequal2_transcript10055/f15p0/1156	62.8867	87.9233	113.757	140.707	133.62	58.92	60.35	69.39	89.46	86.07	88.24	111.26	116.73	113.28	138.84	141.46	141.82	139.83	134.61	126.42
WRI1	AP2	transcript_HQ_sequal2_transcript17436/f2p0/611	54.9733	129.063	61.6667	38.9267	6.12667	56.36	50.05	58.51	125.66	123.93	137.6	67.34	56.03	61.63	40.67	35.77	40.34	6.09	6.12	6.17
ABI3	B3	transcript_HQ_sequal2_transcript57/f2p0/3589	35.86	19.7367	10.1867	19.1367	44.58	33.46	34.86	39.26	20.43	19.88	18.9	8.26	11.54	10.76	17.64	17.55	22.22	40.74	49.62	43.38
Three biological replicates were performed for each developmental stage
