# Supplementary material for: Regulatory mechanisms of fatty acids biosynthesis in Armeniaca sibirica seed kernel oil at different developmental stages
Source: PeerJ. 2022 Oct 4;10:e14125. doi: 10.7717/peerj.14125 (PMC9541615; doi:10.7717/peerj.14125)
Supplement: Supplemental Information 18 [file peerj-10-14125-s018.xlsx]

## Sheet: sequal2.cnci
Table S18 LncRNA prediction results of CNCI software in Armeniaca sibirica seed kernels at different developmental stages.
#transcript_id	transcript_length	type	score
transcript_HQ_sequal2_transcript0/f2p0/4629	4626	noncoding	-0.0159744
transcript_HQ_sequal2_transcript1/f2p0/4576	4577	noncoding	-0.0290816
transcript_HQ_sequal2_transcript1272/f4p0/2360	2360	noncoding	-0.0253952
transcript_HQ_sequal2_transcript11812/f2p0/1047	1047	noncoding	-0.127386
transcript_HQ_sequal2_transcript12729/f3p0/981	981	noncoding	-0.012288
transcript_HQ_sequal2_transcript10002/f2p0/1195	1196	noncoding	-0.0335872
transcript_HQ_sequal2_transcript13634/f2p0/904	904	noncoding	-0.028672
transcript_HQ_sequal2_transcript12732/f3p0/949	948	noncoding	-0.0135168
transcript_HQ_sequal2_transcript10005/f11p0/1211	1210	noncoding	-0.0376832
transcript_HQ_sequal2_transcript13639/f2p0/904	904	noncoding	-0.104858
transcript_HQ_sequal2_transcript14544/f2p0/829	829	noncoding	-0.0155648
transcript_HQ_sequal2_transcript13640/f13p0/807	807	noncoding	-0.02048
transcript_HQ_sequal2_transcript14546/f3p0/901	898	noncoding	-0.0192512
transcript_HQ_sequal2_transcript10013/f2p0/1221	1220	noncoding	-0.0671744
transcript_HQ_sequal2_transcript14554/f4p0/817	817	noncoding	-0.0192512
transcript_HQ_sequal2_transcript1275/f2p0/2344	2346	noncoding	-0.004096
transcript_HQ_sequal2_transcript10021/f8p0/1131	1131	noncoding	-0.0016384
transcript_HQ_sequal2_transcript13662/f3p0/906	906	noncoding	-0.0106496
transcript_HQ_sequal2_transcript13663/f3p0/915	916	noncoding	-0.004096
transcript_HQ_sequal2_transcript14567/f2p0/857	855	noncoding	-0.04096
transcript_HQ_sequal2_transcript14570/f6p0/714	714	noncoding	-0.024576
transcript_HQ_sequal2_transcript10925/f3p0/1126	1126	noncoding	-0.0212992
transcript_HQ_sequal2_transcript11831/f2p0/936	921	noncoding	-0.0212992
transcript_HQ_sequal2_transcript11832/f2p0/1048	1048	noncoding	-0.016384
transcript_HQ_sequal2_transcript11839/f3p0/1054	1054	noncoding	-0.008192
transcript_HQ_sequal2_transcript12775/f2p0/964	964	noncoding	-0.022528
transcript_HQ_sequal2_transcript13682/f4p0/899	898	noncoding	-0.0053248
transcript_HQ_sequal2_transcript11849/f2p0/1070	1068	noncoding	-0.172032
transcript_HQ_sequal2_transcript14590/f2p0/854	854	noncoding	-0.028672
transcript_HQ_sequal2_transcript11854/f2p0/1047	1047	noncoding	-0.0004096
transcript_HQ_sequal2_transcript13699/f7p0/894	894	noncoding	-0.0069632
transcript_HQ_sequal2_transcript12790/f2p0/969	969	noncoding	-0.024576
transcript_HQ_sequal2_transcript12792/f2p0/988	988	noncoding	-0.0589824
transcript_HQ_sequal2_transcript10059/f2p0/1211	1211	noncoding	-0.126976
transcript_HQ_sequal2_transcript13704/f4p0/903	903	noncoding	-0.06144
transcript_HQ_sequal2_transcript11861/f2p0/1054	1049	noncoding	-0.004096
transcript_HQ_sequal2_transcript12797/f12p0/952	951	noncoding	-0.014336
transcript_HQ_sequal2_transcript13706/f2p0/895	895	noncoding	-0.0131072
transcript_HQ_sequal2_transcript10953/f12p0/1137	1136	noncoding	-0.008192
transcript_HQ_sequal2_transcript14604/f5p0/826	826	noncoding	-0.0233472
transcript_HQ_sequal2_transcript13708/f2p0/887	887	noncoding	-0.100762
transcript_HQ_sequal2_transcript11871/f4p0/1032	1032	noncoding	-0.0495616
transcript_HQ_sequal2_transcript1371/f2p0/2293	2293	noncoding	-0.008192
transcript_HQ_sequal2_transcript13716/f18p0/910	909	noncoding	-0.024576
transcript_HQ_sequal2_transcript12814/f2p0/970	970	noncoding	-0.012288
transcript_HQ_sequal2_transcript11882/f2p0/1064	1059	noncoding	-0.0212992
transcript_HQ_sequal2_transcript14619/f3p0/894	895	noncoding	-0.036864
transcript_HQ_sequal2_transcript12818/f3p0/958	958	noncoding	-0.0794624
transcript_HQ_sequal2_transcript13724/f2p0/904	903	noncoding	-0.0344064
transcript_HQ_sequal2_transcript12821/f3p0/956	956	noncoding	-0.0557056
transcript_HQ_sequal2_transcript13733/f5p0/897	896	noncoding	-0.0135168
transcript_HQ_sequal2_transcript10088/f2p0/1181	1180	noncoding	-0.0274432
transcript_HQ_sequal2_transcript10090/f2p0/1189	1188	noncoding	-0.022528
transcript_HQ_sequal2_transcript1190/f5p0/2377	2377	noncoding	-0.0221184
transcript_HQ_sequal2_transcript10094/f2p0/1190	1190	noncoding	-0.0270336
transcript_HQ_sequal2_transcript10096/f4p0/1189	1189	noncoding	-0.0598016
transcript_HQ_sequal2_transcript14636/f71p0/718	718	noncoding	-0.0159744
transcript_HQ_sequal2_transcript13751/f2p0/915	920	noncoding	-0.026624
transcript_HQ_sequal2_transcript14638/f3p0/787	786	noncoding	-0.131072
transcript_HQ_sequal2_transcript12843/f11p0/933	933	noncoding	-0.0364544
transcript_HQ_sequal2_transcript12848/f2p0/987	988	noncoding	-0.0016384
transcript_HQ_sequal2_transcript11901/f2p0/992	989	noncoding	-0.0385024
transcript_HQ_sequal2_transcript13760/f3p0/995	994	noncoding	-0.0004096
transcript_HQ_sequal2_transcript13770/f2p0/887	887	noncoding	-0.0114688
transcript_HQ_sequal2_transcript13778/f3p0/888	888	noncoding	-0.0610304
transcript_HQ_sequal2_transcript11920/f10p0/1034	1034	noncoding	-0.0364544
transcript_HQ_sequal2_transcript13781/f3p0/817	816	noncoding	-0.024576
transcript_HQ_sequal2_transcript13782/f8p0/854	854	noncoding	-0.294912
transcript_HQ_sequal2_transcript13792/f5p0/886	886	noncoding	-0.02048
transcript_HQ_sequal2_transcript13795/f8p0/885	883	noncoding	-0.0118784
transcript_HQ_sequal2_transcript10127/f10p0/1176	1176	noncoding	-0.0565248
transcript_HQ_sequal2_transcript11029/f2p0/1117	1115	noncoding	-0.0176128
transcript_HQ_sequal2_transcript11948/f3p0/1045	1045	noncoding	-0.045056
transcript_HQ_sequal2_transcript14655/f6p0/823	823	noncoding	-0.0454656
transcript_HQ_sequal2_transcript14670/f3p0/818	818	noncoding	-0.4096
transcript_HQ_sequal2_transcript11974/f3p0/1033	1034	noncoding	-0.045056
transcript_HQ_sequal2_transcript11046/f8p0/1094	1094	noncoding	-0.0004096
transcript_HQ_sequal2_transcript11047/f2p0/1131	1132	noncoding	-0.0323584
transcript_HQ_sequal2_transcript14676/f4p0/852	852	noncoding	-0.0765952
transcript_HQ_sequal2_transcript13842/f2p0/824	822	noncoding	-0.036864
transcript_HQ_sequal2_transcript11054/f2p0/1124	1123	noncoding	-0.0344064
transcript_HQ_sequal2_transcript11990/f2p0/1022	1022	noncoding	-0.109773
transcript_HQ_sequal2_transcript11997/f4p0/1029	1029	noncoding	-0.0008192
transcript_HQ_sequal2_transcript14692/f5p0/819	819	noncoding	-0.04096
transcript_HQ_sequal2_transcript13858/f4p0/884	884	noncoding	-0.0016384
transcript_HQ_sequal2_transcript1289/f2p0/2325	2324	noncoding	-0.045056
transcript_HQ_sequal2_transcript13860/f5p0/922	923	noncoding	-0.0466944
transcript_HQ_sequal2_transcript12892/f2p0/960	960	noncoding	-0.024576
transcript_HQ_sequal2_transcript14708/f8p0/827	827	noncoding	-0.0442368
transcript_HQ_sequal2_transcript12010/f2p0/1028	1029	noncoding	-0.106496
transcript_HQ_sequal2_transcript11078/f3p0/1122	1122	noncoding	-0.02048
transcript_HQ_sequal2_transcript13869/f6p0/888	888	noncoding	-0.0978944
transcript_HQ_sequal2_transcript10164/f4p0/1051	1034	noncoding	-0.0167936
transcript_HQ_sequal2_transcript12015/f3p0/1027	1027	noncoding	-0.03072
transcript_HQ_sequal2_transcript11083/f3p0/1120	1120	noncoding	-0.016384
transcript_HQ_sequal2_transcript11085/f3p0/1110	1109	noncoding	-0.016384
transcript_HQ_sequal2_transcript13873/f2p0/877	877	noncoding	-0.0004096
transcript_HQ_sequal2_transcript12022/f2p0/1040	1040	noncoding	-0.016384
transcript_HQ_sequal2_transcript14724/f2p0/808	808	noncoding	-0.008192
transcript_HQ_sequal2_transcript12908/f2p0/967	967	noncoding	-0.090112
transcript_HQ_sequal2_transcript14730/f2p0/812	812	noncoding	-0.0008192
transcript_HQ_sequal2_transcript14732/f2p0/815	814	noncoding	-0.0028672
transcript_HQ_sequal2_transcript12914/f2p0/960	960	noncoding	-0.016384
transcript_HQ_sequal2_transcript12029/f2p0/1026	1025	noncoding	-0.036864
transcript_HQ_sequal2_transcript12918/f5p0/937	936	noncoding	-0.0004096
transcript_HQ_sequal2_transcript13876/f8p0/908	905	noncoding	-0.090112
transcript_HQ_sequal2_transcript14740/f3p0/812	812	noncoding	-0.0237568
transcript_HQ_sequal2_transcript14748/f3p0/821	821	noncoding	-0.0413696
transcript_HQ_sequal2_transcript14755/f2p0/810	810	noncoding	-0.065536
transcript_HQ_sequal2_transcript12040/f2p0/1015	1014	noncoding	-0.0004096
transcript_HQ_sequal2_transcript1293/f2p0/2330	2330	noncoding	-0.016384
transcript_HQ_sequal2_transcript12930/f2p0/950	950	noncoding	-0.057344
transcript_HQ_sequal2_transcript12045/f2p0/1025	1025	noncoding	-0.294912
transcript_HQ_sequal2_transcript14762/f2p0/816	816	noncoding	-0.063488
transcript_HQ_sequal2_transcript12934/f5p0/953	953	noncoding	-0.018432
transcript_HQ_sequal2_transcript12936/f3p0/960	957	noncoding	-0.012288
transcript_HQ_sequal2_transcript10207/f7p0/1183	1183	noncoding	-0.0126976
transcript_HQ_sequal2_transcript12056/f2p0/1014	1014	noncoding	-0.0004096
transcript_HQ_sequal2_transcript10212/f4p0/1191	1189	noncoding	-0.08192
transcript_HQ_sequal2_transcript12064/f2p0/1008	1008	noncoding	-0.0258048
transcript_HQ_sequal2_transcript12066/f2p0/1027	1027	noncoding	-0.0155648
transcript_HQ_sequal2_transcript14793/f2p0/814	814	noncoding	-0.0118784
transcript_HQ_sequal2_transcript14798/f2p0/807	808	noncoding	-0.0380928
transcript_HQ_sequal2_transcript13926/f4p0/877	877	noncoding	-0.0159744
transcript_HQ_sequal2_transcript10239/f2p0/1184	1184	noncoding	-0.0159744
transcript_HQ_sequal2_transcript14806/f2p0/824	822	noncoding	-0.0278528
transcript_HQ_sequal2_transcript12092/f2p0/1025	1025	noncoding	-0.01024
transcript_HQ_sequal2_transcript14810/f37p0/737	736	noncoding	-0.002048
transcript_HQ_sequal2_transcript12098/f7p0/1014	1014	noncoding	-0.086016
transcript_HQ_sequal2_transcript12099/f8p0/1022	1022	noncoding	-0.06144
transcript_HQ_sequal2_transcript13953/f12p0/856	856	noncoding	-0.0352256
transcript_HQ_sequal2_transcript14817/f7p0/803	803	noncoding	-0.053248
transcript_HQ_sequal2_transcript13955/f8p0/881	881	noncoding	-0.0053248
transcript_HQ_sequal2_transcript13965/f2p0/868	868	noncoding	-0.190464
transcript_HQ_sequal2_transcript12112/f3p0/1021	1021	noncoding	-0.038912
transcript_HQ_sequal2_transcript13973/f4p0/840	840	noncoding	-0.016384
transcript_HQ_sequal2_transcript12122/f3p0/1024	1017	noncoding	-0.0782336
transcript_HQ_sequal2_transcript13980/f4p0/876	876	noncoding	-0.018432
transcript_HQ_sequal2_transcript10275/f4p0/1183	1183	noncoding	-0.008192
transcript_HQ_sequal2_transcript14854/f5p0/795	795	noncoding	-0.0991232
transcript_HQ_sequal2_transcript11180/f12p0/1112	1112	noncoding	-0.0249856
transcript_HQ_sequal2_transcript13997/f6p0/893	893	noncoding	-0.0004096
transcript_HQ_sequal2_transcript14873/f2p0/813	812	noncoding	-0.0004096
transcript_HQ_sequal2_transcript14010/f2p0/878	879	noncoding	-0.117965
transcript_HQ_sequal2_transcript14021/f2p0/872	872	noncoding	-0.0045056
transcript_HQ_sequal2_transcript10303/f2p0/1176	1176	noncoding	-0.028672
transcript_HQ_sequal2_transcript14026/f6p0/897	897	noncoding	-0.0106496
transcript_HQ_sequal2_transcript14031/f6p0/869	869	noncoding	-0.057344
transcript_HQ_sequal2_transcript14891/f2p0/817	817	noncoding	-0.0077824
transcript_HQ_sequal2_transcript14034/f2p0/868	868	noncoding	-0.0458752
transcript_HQ_sequal2_transcript11214/f2p0/1102	1102	noncoding	-0.0229376
transcript_HQ_sequal2_transcript14896/f12p0/818	817	noncoding	-0.0077824
transcript_HQ_sequal2_transcript14041/f3p0/869	869	noncoding	-0.0544768
transcript_HQ_sequal2_transcript12144/f2p0/937	910	noncoding	-0.0118784
transcript_HQ_sequal2_transcript14901/f21p0/795	795	noncoding	-0.23552
transcript_HQ_sequal2_transcript12978/f2p0/948	948	noncoding	-0.0360448
transcript_HQ_sequal2_transcript10331/f2p0/1181	1181	noncoding	-0.016384
transcript_HQ_sequal2_transcript10332/f22p0/1124	1122	noncoding	-0.045056
transcript_HQ_sequal2_transcript10334/f3p0/1141	1140	noncoding	-0.0507904
transcript_HQ_sequal2_transcript14043/f7p0/875	874	noncoding	-0.0385024
transcript_HQ_sequal2_transcript12988/f2p0/948	948	noncoding	-0.0221184
transcript_HQ_sequal2_transcript10336/f2p0/1184	1172	noncoding	-0.0323584
transcript_HQ_sequal2_transcript14918/f2p0/818	818	noncoding	-0.034816
transcript_HQ_sequal2_transcript11239/f2p0/1128	1128	noncoding	-0.008192
transcript_HQ_sequal2_transcript14051/f3p0/865	865	noncoding	-0.0053248
transcript_HQ_sequal2_transcript14058/f2p0/860	859	noncoding	-0.0438272
transcript_HQ_sequal2_transcript14063/f7p0/885	883	noncoding	-0.0172032
transcript_HQ_sequal2_transcript13001/f9p0/948	948	noncoding	-0.0978944
transcript_HQ_sequal2_transcript14072/f2p0/865	866	noncoding	-0.0454656
transcript_HQ_sequal2_transcript14940/f2p0/802	802	noncoding	-0.0176128
transcript_HQ_sequal2_transcript11255/f3p0/1099	1099	noncoding	-0.0004096
transcript_HQ_sequal2_transcript14076/f4p0/865	865	noncoding	-0.108544
transcript_HQ_sequal2_transcript10358/f2p0/1174	1173	noncoding	-0.069632
transcript_HQ_sequal2_transcript13011/f2p0/948	949	noncoding	-0.02048
transcript_HQ_sequal2_transcript12175/f2p0/1021	1021	noncoding	-0.0045056
transcript_HQ_sequal2_transcript14955/f2p0/786	786	noncoding	-0.0004096
transcript_HQ_sequal2_transcript14094/f4p0/857	856	noncoding	-0.06144
transcript_HQ_sequal2_transcript14959/f2p0/800	794	noncoding	-0.0475136
transcript_HQ_sequal2_transcript14096/f2p0/864	865	noncoding	-0.008192
transcript_HQ_sequal2_transcript14960/f16p0/791	791	noncoding	-0.0131072
transcript_HQ_sequal2_transcript11282/f4p0/1113	1113	noncoding	-0.008192
transcript_HQ_sequal2_transcript12193/f2p0/1003	1003	noncoding	-0.0610304
transcript_HQ_sequal2_transcript14971/f2p0/819	820	noncoding	-0.110592
transcript_HQ_sequal2_transcript14980/f10p0/822	822	noncoding	-0.0147456
transcript_HQ_sequal2_transcript14981/f8p0/795	795	noncoding	-0.04096
transcript_HQ_sequal2_transcript13048/f2p0/946	944	noncoding	-0.0200704
transcript_HQ_sequal2_transcript10392/f3p0/1196	1196	noncoding	-0.0475136
transcript_HQ_sequal2_transcript14117/f7p0/860	860	noncoding	-0.0118784
transcript_HQ_sequal2_transcript14120/f6p0/863	863	noncoding	-0.08192
transcript_HQ_sequal2_transcript14121/f3p0/856	857	noncoding	-0.028672
transcript_HQ_sequal2_transcript1130/f2p0/2445	2446	noncoding	-0.088064
transcript_HQ_sequal2_transcript12207/f4p0/1021	1018	noncoding	-0.0139264
transcript_HQ_sequal2_transcript1307/f3p0/2337	2337	noncoding	-0.024576
transcript_HQ_sequal2_transcript11309/f5p0/1089	1089	noncoding	-0.0372736
transcript_HQ_sequal2_transcript13072/f6p0/907	907	noncoding	-0.045056
transcript_HQ_sequal2_transcript1131/f2p0/2399	2399	noncoding	-0.0335872
transcript_HQ_sequal2_transcript14132/f2p0/862	862	noncoding	-0.012288
transcript_HQ_sequal2_transcript14133/f2p0/868	869	noncoding	-0.0135168
transcript_HQ_sequal2_transcript13075/f2p0/942	941	noncoding	-0.0364544
transcript_HQ_sequal2_transcript14134/f2p0/858	858	noncoding	-0.0147456
transcript_HQ_sequal2_transcript15003/f2p0/804	799	noncoding	-0.0339968
transcript_HQ_sequal2_transcript10418/f3p0/1170	1170	noncoding	-0.0868352
transcript_HQ_sequal2_transcript13081/f3p0/945	941	noncoding	-0.0237568
transcript_HQ_sequal2_transcript12230/f33p0/970	970	noncoding	-0.0045056
transcript_HQ_sequal2_transcript14145/f3p0/858	858	noncoding	-0.0159744
transcript_HQ_sequal2_transcript15015/f3p0/793	793	noncoding	-0.0024576
transcript_HQ_sequal2_transcript15020/f3p0/794	794	noncoding	-0.0602112
transcript_HQ_sequal2_transcript15022/f2p0/794	794	noncoding	-0.0352256
transcript_HQ_sequal2_transcript11331/f2p0/1092	1092	noncoding	-0.059392
transcript_HQ_sequal2_transcript13099/f4p0/951	951	noncoding	-0.0458752
transcript_HQ_sequal2_transcript13101/f5p0/949	948	noncoding	-0.016384
transcript_HQ_sequal2_transcript13102/f5p0/983	982	noncoding	-0.0151552
transcript_HQ_sequal2_transcript13103/f2p0/940	940	noncoding	-0.0991232
transcript_HQ_sequal2_transcript15042/f12p0/771	771	noncoding	-0.0217088
transcript_HQ_sequal2_transcript15043/f2p0/794	794	noncoding	-0.0311296
transcript_HQ_sequal2_transcript10445/f4p0/1200	1200	noncoding	-0.0114688
transcript_HQ_sequal2_transcript15047/f4p0/802	803	noncoding	-0.0155648
transcript_HQ_sequal2_transcript10448/f3p0/1174	1174	noncoding	-0.028672
transcript_HQ_sequal2_transcript11350/f2p0/1087	1087	noncoding	-0.016384
transcript_HQ_sequal2_transcript13114/f2p0/933	933	noncoding	-0.0684032
transcript_HQ_sequal2_transcript13120/f5p0/948	948	noncoding	-0.0057344
transcript_HQ_sequal2_transcript13121/f6p0/959	959	noncoding	-0.012288
transcript_HQ_sequal2_transcript11360/f2p0/1068	1062	noncoding	-0.0569344
transcript_HQ_sequal2_transcript11365/f3p0/1084	1084	noncoding	-0.008192
transcript_HQ_sequal2_transcript12252/f4p0/904	900	noncoding	-0.0475136
transcript_HQ_sequal2_transcript13129/f44p0/891	891	noncoding	-0.04096
transcript_HQ_sequal2_transcript12262/f3p0/1042	1040	noncoding	-0.012288
transcript_HQ_sequal2_transcript12264/f3p0/1011	1011	noncoding	-0.0208896
transcript_HQ_sequal2_transcript10482/f8p0/1171	1171	noncoding	-0.024576
transcript_HQ_sequal2_transcript12266/f2p0/996	976	noncoding	-0.024576
transcript_HQ_sequal2_transcript12272/f3p0/1007	1005	noncoding	-0.03072
transcript_HQ_sequal2_transcript10490/f2p0/1166	1166	noncoding	-0.012288
transcript_HQ_sequal2_transcript10495/f2p0/1165	1165	noncoding	-0.02048
transcript_HQ_sequal2_transcript14158/f2p0/858	860	noncoding	-0.16384
transcript_HQ_sequal2_transcript13162/f2p0/958	957	noncoding	-0.0135168
transcript_HQ_sequal2_transcript11374/f2p0/1085	1085	noncoding	-0.03072
transcript_HQ_sequal2_transcript11375/f10p0/1089	1089	noncoding	-0.073728
transcript_HQ_sequal2_transcript13173/f4p0/935	933	noncoding	-0.012288
transcript_HQ_sequal2_transcript12295/f14p0/1008	1008	noncoding	-0.0475136
transcript_HQ_sequal2_transcript10512/f2p0/1180	1180	noncoding	-0.111411
transcript_HQ_sequal2_transcript13183/f2p0/954	954	noncoding	-0.016384
transcript_HQ_sequal2_transcript13193/f2p0/941	941	noncoding	-0.0200704
transcript_HQ_sequal2_transcript12306/f2p0/1019	1019	noncoding	-0.0294912
transcript_HQ_sequal2_transcript14178/f2p0/867	867	noncoding	-0.012288
transcript_HQ_sequal2_transcript14181/f2p0/845	844	noncoding	-0.0253952
transcript_HQ_sequal2_transcript10534/f2p0/1157	1157	noncoding	-0.0151552
transcript_HQ_sequal2_transcript13201/f24p0/847	847	noncoding	-0.0233472
transcript_HQ_sequal2_transcript12320/f4p0/1009	1009	noncoding	-0.028672
transcript_HQ_sequal2_transcript14191/f2p0/851	851	noncoding	-0.0233472
transcript_HQ_sequal2_transcript14192/f2p0/861	861	noncoding	-0.008192
transcript_HQ_sequal2_transcript10545/f2p0/1155	1155	noncoding	-0.012288
transcript_HQ_sequal2_transcript15065/f2p0/730	730	noncoding	-0.004096
transcript_HQ_sequal2_transcript11419/f2p0/1080	1081	noncoding	-0.0274432
transcript_HQ_sequal2_transcript13216/f3p0/935	935	noncoding	-0.0180224
transcript_HQ_sequal2_transcript13217/f10p0/934	932	noncoding	-0.038912
transcript_HQ_sequal2_transcript12331/f2p0/1003	1004	noncoding	-0.04096
transcript_HQ_sequal2_transcript13218/f2p0/940	938	noncoding	-0.0241664
transcript_HQ_sequal2_transcript142/f8p0/3288	3288	noncoding	-0.0524288
transcript_HQ_sequal2_transcript12337/f3p0/1019	1019	noncoding	-0.0372736
transcript_HQ_sequal2_transcript13229/f2p0/936	932	noncoding	-0.032768
transcript_HQ_sequal2_transcript15087/f3p0/788	789	noncoding	-0.034816
transcript_HQ_sequal2_transcript12346/f16p0/984	984	noncoding	-0.06144
transcript_HQ_sequal2_transcript12347/f5p0/995	995	noncoding	-0.0139264
transcript_HQ_sequal2_transcript14209/f2p0/848	848	noncoding	-0.237568
transcript_HQ_sequal2_transcript1510/f2p0/2297	2297	noncoding	-0.004096
transcript_HQ_sequal2_transcript10547/f6p0/1057	1017	noncoding	-0.0462848
transcript_HQ_sequal2_transcript10548/f2p0/1153	1153	noncoding	-0.152371
transcript_HQ_sequal2_transcript10549/f7p0/1156	1156	noncoding	-0.0802816
transcript_HQ_sequal2_transcript11453/f2p0/1094	1094	noncoding	-0.0069632
transcript_HQ_sequal2_transcript1236/f2p0/2363	2363	noncoding	-0.077824
transcript_HQ_sequal2_transcript13242/f2p0/938	938	noncoding	-0.036864
transcript_HQ_sequal2_transcript13244/f4p0/910	909	noncoding	-0.0126976
transcript_HQ_sequal2_transcript13247/f2p0/925	924	noncoding	-0.004096
transcript_HQ_sequal2_transcript11462/f2p0/1077	1077	noncoding	-0.0249856
transcript_HQ_sequal2_transcript13253/f2p0/945	945	noncoding	-0.008192
transcript_HQ_sequal2_transcript13255/f2p0/935	935	noncoding	-0.03072
transcript_HQ_sequal2_transcript12363/f21p0/924	924	noncoding	-0.0229376
transcript_HQ_sequal2_transcript14249/f17p0/811	809	noncoding	-0.0077824
transcript_HQ_sequal2_transcript13264/f2p0/932	932	noncoding	-0.208896
transcript_HQ_sequal2_transcript13265/f6p0/938	938	noncoding	-0.012288
transcript_HQ_sequal2_transcript14257/f2p0/850	850	noncoding	-0.1024
transcript_HQ_sequal2_transcript10573/f3p0/1161	1161	noncoding	-0.012288
transcript_HQ_sequal2_transcript1328/f2p0/2320	2322	noncoding	-0.0200704
transcript_HQ_sequal2_transcript11489/f4p0/1007	1002	noncoding	-0.0626688
transcript_HQ_sequal2_transcript14271/f15p0/855	855	noncoding	-0.024576
transcript_HQ_sequal2_transcript12393/f2p0/994	994	noncoding	-0.022528
transcript_HQ_sequal2_transcript12395/f5p0/1018	1018	noncoding	-0.0135168
transcript_HQ_sequal2_transcript13290/f3p0/923	925	noncoding	-0.028672
transcript_HQ_sequal2_transcript13292/f14p0/900	900	noncoding	-0.012288
transcript_HQ_sequal2_transcript12401/f2p0/966	966	noncoding	-0.014336
transcript_HQ_sequal2_transcript12402/f3p0/501	501	noncoding	-0.0303104
transcript_HQ_sequal2_transcript1330/f2p0/2331	2330	noncoding	-0.0004096
transcript_HQ_sequal2_transcript14294/f2p0/840	840	noncoding	-0.032768
transcript_HQ_sequal2_transcript12411/f2p0/999	997	noncoding	-0.0487424
transcript_HQ_sequal2_transcript11513/f2p0/1071	1071	noncoding	-0.0966656
transcript_HQ_sequal2_transcript12414/f2p0/501	500	noncoding	-0.0241664
transcript_HQ_sequal2_transcript11515/f2p0/1085	1085	noncoding	-0.0380928
transcript_HQ_sequal2_transcript14299/f2p0/862	861	noncoding	-0.0344064
transcript_HQ_sequal2_transcript15115/f2p0/797	797	noncoding	-0.02048
transcript_HQ_sequal2_transcript12417/f4p0/997	997	noncoding	-0.106496
transcript_HQ_sequal2_transcript15125/f2p0/799	799	noncoding	-0.012288
transcript_HQ_sequal2_transcript15126/f2p0/789	789	noncoding	-0.0606208
transcript_HQ_sequal2_transcript13317/f2p0/872	872	noncoding	-0.0237568
transcript_HQ_sequal2_transcript13319/f2p0/927	927	noncoding	-0.008192
transcript_HQ_sequal2_transcript15130/f5p0/777	775	noncoding	-0.0397312
transcript_HQ_sequal2_transcript15132/f3p0/782	782	noncoding	-0.008192
transcript_HQ_sequal2_transcript12426/f2p0/1005	1005	noncoding	-0.0200704
transcript_HQ_sequal2_transcript15134/f2p0/792	792	noncoding	-0.002048
transcript_HQ_sequal2_transcript10622/f6p0/1171	1169	noncoding	-0.0073728
transcript_HQ_sequal2_transcript15136/f2p0/784	783	noncoding	-0.090112
transcript_HQ_sequal2_transcript14317/f2p0/856	856	noncoding	-0.024576
transcript_HQ_sequal2_transcript13322/f3p0/864	864	noncoding	-0.0360448
transcript_HQ_sequal2_transcript10625/f3p0/1160	1160	noncoding	-0.04096
transcript_HQ_sequal2_transcript15139/f13p0/722	722	noncoding	-0.0200704
transcript_HQ_sequal2_transcript15140/f2p0/784	785	noncoding	-0.04096
transcript_HQ_sequal2_transcript13328/f2p0/926	926	noncoding	-0.131072
transcript_HQ_sequal2_transcript15142/f10p0/786	785	noncoding	-0.049152
transcript_HQ_sequal2_transcript15145/f3p0/795	795	noncoding	-0.0487424
transcript_HQ_sequal2_transcript13338/f11p0/886	886	noncoding	-0.0364544
transcript_HQ_sequal2_transcript14331/f5p0/845	845	noncoding	-0.0413696
transcript_HQ_sequal2_transcript14339/f2p0/847	846	noncoding	-0.0294912
transcript_HQ_sequal2_transcript12448/f2p0/958	958	noncoding	-0.02048
transcript_HQ_sequal2_transcript15162/f8p0/824	824	noncoding	-0.065536
transcript_HQ_sequal2_transcript15165/f2p0/787	787	noncoding	-0.04096
transcript_HQ_sequal2_transcript15166/f2p0/783	783	noncoding	-0.0638976
transcript_HQ_sequal2_transcript12456/f3p0/1002	1002	noncoding	-0.02048
transcript_HQ_sequal2_transcript11556/f2p0/1076	1075	noncoding	-0.0004096
transcript_HQ_sequal2_transcript15176/f2p0/791	791	noncoding	-0.038912
transcript_HQ_sequal2_transcript12461/f2p0/998	997	noncoding	-0.028672
transcript_HQ_sequal2_transcript15194/f2p0/784	783	noncoding	-0.0278528
transcript_HQ_sequal2_transcript1437/f3p0/2275	2275	noncoding	-0.0004096
transcript_HQ_sequal2_transcript11572/f3p0/1072	1071	noncoding	-0.0274432
transcript_HQ_sequal2_transcript15199/f2p0/769	769	noncoding	-0.0028672
transcript_HQ_sequal2_transcript12476/f2p0/987	987	noncoding	-0.022528
transcript_HQ_sequal2_transcript13380/f2p0/934	934	noncoding	-0.0057344
transcript_HQ_sequal2_transcript14383/f8p0/851	850	noncoding	-0.0503808
transcript_HQ_sequal2_transcript13383/f2p0/923	923	noncoding	-0.08192
transcript_HQ_sequal2_transcript12484/f7p0/1071	1071	noncoding	-0.045056
transcript_HQ_sequal2_transcript14387/f2p0/840	840	noncoding	-0.069632
transcript_HQ_sequal2_transcript13386/f2p0/901	901	noncoding	-0.032768
transcript_HQ_sequal2_transcript12487/f4p0/990	990	noncoding	-0.0106496
transcript_HQ_sequal2_transcript11585/f2p0/1096	1095	noncoding	-0.012288
transcript_HQ_sequal2_transcript15211/f3p0/782	782	noncoding	-0.0909312
transcript_HQ_sequal2_transcript15212/f10p0/789	789	noncoding	-0.0512
transcript_HQ_sequal2_transcript14398/f5p0/841	841	noncoding	-0.0004096
transcript_HQ_sequal2_transcript15223/f74p0/737	737	noncoding	-0.024576
transcript_HQ_sequal2_transcript1250/f2p0/2353	2353	noncoding	-0.0176128
transcript_HQ_sequal2_transcript15228/f4p0/783	782	noncoding	-0.0135168
transcript_HQ_sequal2_transcript10690/f10p0/1150	1150	noncoding	-0.036864
transcript_HQ_sequal2_transcript15234/f2p0/779	779	noncoding	-0.057344
transcript_HQ_sequal2_transcript13412/f2p0/921	921	noncoding	-0.0385024
transcript_HQ_sequal2_transcript13418/f5p0/932	932	noncoding	-0.0004096
transcript_HQ_sequal2_transcript15244/f2p0/787	783	noncoding	-0.0004096
transcript_HQ_sequal2_transcript11596/f23p0/994	994	noncoding	-0.059392
transcript_HQ_sequal2_transcript15250/f4p0/785	785	noncoding	-0.0274432
transcript_HQ_sequal2_transcript14428/f2p0/840	840	noncoding	-0.022528
transcript_HQ_sequal2_transcript12528/f5p0/990	991	noncoding	-0.022528
transcript_HQ_sequal2_transcript14439/f3p0/824	824	noncoding	-0.086016
transcript_HQ_sequal2_transcript15264/f2p0/786	786	noncoding	-0.364544
transcript_HQ_sequal2_transcript13438/f7p0/911	911	noncoding	-0.0073728
transcript_HQ_sequal2_transcript11613/f5p0/1006	1006	noncoding	-0.0200704
transcript_HQ_sequal2_transcript13442/f2p0/911	911	noncoding	-0.02048
transcript_HQ_sequal2_transcript15274/f3p0/752	752	noncoding	-0.024576
transcript_HQ_sequal2_transcript15277/f2p0/788	788	noncoding	-0.049152
transcript_HQ_sequal2_transcript13451/f2p0/925	925	noncoding	-0.0147456
transcript_HQ_sequal2_transcript10726/f4p0/1131	1132	noncoding	-0.118784
transcript_HQ_sequal2_transcript11624/f4p0/1080	1079	noncoding	-0.0475136
transcript_HQ_sequal2_transcript14464/f19p0/818	817	noncoding	-0.0540672
transcript_HQ_sequal2_transcript14465/f2p0/855	856	noncoding	-0.086016
transcript_HQ_sequal2_transcript15292/f3p0/776	776	noncoding	-0.04096
transcript_HQ_sequal2_transcript14469/f3p0/846	846	noncoding	-0.098304
transcript_HQ_sequal2_transcript12566/f2p0/999	999	noncoding	-0.004096
transcript_HQ_sequal2_transcript13465/f4p0/919	919	noncoding	-0.0917504
transcript_HQ_sequal2_transcript14479/f3p0/839	839	noncoding	-0.002048
transcript_HQ_sequal2_transcript11637/f2p0/1089	1089	noncoding	-0.012288
transcript_HQ_sequal2_transcript11638/f2p0/1097	1093	noncoding	-0.0098304
transcript_HQ_sequal2_transcript12575/f9p0/989	989	noncoding	-0.012288
transcript_HQ_sequal2_transcript14484/f5p0/832	832	noncoding	-0.086016
transcript_HQ_sequal2_transcript13475/f4p0/916	915	noncoding	-0.06144
transcript_HQ_sequal2_transcript13479/f2p0/918	918	noncoding	-0.02048
transcript_HQ_sequal2_transcript15315/f8p0/745	745	noncoding	-0.0262144
transcript_HQ_sequal2_transcript14499/f2p0/836	835	noncoding	-0.03072
transcript_HQ_sequal2_transcript13486/f5p0/921	921	noncoding	-0.043008
transcript_HQ_sequal2_transcript14500/f5p0/814	814	noncoding	-0.0274432
transcript_HQ_sequal2_transcript11651/f2p0/1062	1062	noncoding	-0.016384
transcript_HQ_sequal2_transcript15327/f2p0/774	774	noncoding	-0.0524288
transcript_HQ_sequal2_transcript14513/f2p0/822	822	noncoding	-0.0045056
transcript_HQ_sequal2_transcript12600/f6p0/978	978	noncoding	-0.02048
transcript_HQ_sequal2_transcript12604/f3p0/990	990	noncoding	-0.0167936
transcript_HQ_sequal2_transcript14521/f6p0/840	840	noncoding	-0.0520192
transcript_HQ_sequal2_transcript10779/f2p0/1144	1144	noncoding	-0.016384
transcript_HQ_sequal2_transcript11671/f2p0/1071	1068	noncoding	-0.086016
transcript_HQ_sequal2_transcript13516/f3p0/912	912	noncoding	-0.022528
transcript_HQ_sequal2_transcript12619/f2p0/978	978	noncoding	-0.065536
transcript_HQ_sequal2_transcript15454/f6p0/797	797	noncoding	-0.0004096
transcript_HQ_sequal2_transcript15359/f2p0/770	770	noncoding	-0.008192
transcript_HQ_sequal2_transcript13525/f2p0/915	915	noncoding	-0.0618496
transcript_HQ_sequal2_transcript15365/f2p0/795	784	noncoding	-0.032768
transcript_HQ_sequal2_transcript15366/f2p0/780	774	noncoding	-0.0331776
transcript_HQ_sequal2_transcript13534/f7p0/890	889	noncoding	-0.028672
transcript_HQ_sequal2_transcript1169/f3p0/2387	2387	noncoding	-0.0364544
transcript_HQ_sequal2_transcript11693/f2p0/1074	1074	noncoding	-0.0200704
transcript_HQ_sequal2_transcript15370/f7p0/781	776	noncoding	-0.0815104
transcript_HQ_sequal2_transcript15371/f2p0/792	792	noncoding	-0.0200704
transcript_HQ_sequal2_transcript15372/f2p0/776	776	noncoding	-0.004096
transcript_HQ_sequal2_transcript11696/f3p0/1055	1055	noncoding	-0.0073728
transcript_HQ_sequal2_transcript10811/f2p0/1131	1131	noncoding	-0.0053248
transcript_HQ_sequal2_transcript12642/f8p0/985	985	noncoding	-0.008192
transcript_HQ_sequal2_transcript117/f2p0/3367	3367	noncoding	-0.0401408
transcript_HQ_sequal2_transcript12644/f3p0/980	980	noncoding	-0.0782336
transcript_HQ_sequal2_transcript12646/f2p0/977	977	noncoding	-0.014336
transcript_HQ_sequal2_transcript15480/f2p0/775	774	noncoding	-0.0319488
transcript_HQ_sequal2_transcript15385/f2p0/771	771	noncoding	-0.004096
transcript_HQ_sequal2_transcript15486/f3p0/759	759	noncoding	-0.016384
transcript_HQ_sequal2_transcript11708/f2p0/1078	1078	noncoding	-0.0004096
transcript_HQ_sequal2_transcript15395/f3p0/768	767	noncoding	-0.094208
transcript_HQ_sequal2_transcript11710/f7p0/1070	1072	noncoding	-0.045056
transcript_HQ_sequal2_transcript15497/f2p0/766	766	noncoding	-0.008192
transcript_HQ_sequal2_transcript155/f3p0/3218	3218	noncoding	-0.0344064
transcript_HQ_sequal2_transcript11716/f15p0/1052	1052	noncoding	-0.0045056
transcript_HQ_sequal2_transcript12670/f3p0/915	915	noncoding	-0.0446464
transcript_HQ_sequal2_transcript15507/f2p0/768	768	noncoding	-0.028672
transcript_HQ_sequal2_transcript10829/f24p0/1102	1085	noncoding	-0.0024576
transcript_HQ_sequal2_transcript15410/f2p0/772	772	noncoding	-0.111411
transcript_HQ_sequal2_transcript10833/f2p0/1150	1152	noncoding	-0.0196608
transcript_HQ_sequal2_transcript15417/f2p0/764	764	noncoding	-0.004096
transcript_HQ_sequal2_transcript15517/f2p0/771	768	noncoding	-0.0311296
transcript_HQ_sequal2_transcript10847/f4p0/1130	1130	noncoding	-0.032768
transcript_HQ_sequal2_transcript10850/f6p0/1143	1143	noncoding	-0.012288
transcript_HQ_sequal2_transcript12696/f7p0/969	969	noncoding	-0.0405504
transcript_HQ_sequal2_transcript15433/f5p0/764	764	noncoding	-0.0421888
transcript_HQ_sequal2_transcript12699/f2p0/999	997	noncoding	-0.0159744
transcript_HQ_sequal2_transcript15438/f3p0/774	774	noncoding	-0.0221184
transcript_HQ_sequal2_transcript16352/f2p0/699	698	noncoding	-0.03072
transcript_HQ_sequal2_transcript16356/f2p0/722	722	noncoding	-0.0282624
transcript_HQ_sequal2_transcript13586/f22p0/791	792	noncoding	-0.0192512
transcript_HQ_sequal2_transcript16360/f12p0/698	697	noncoding	-0.0790528
transcript_HQ_sequal2_transcript15532/f3p0/742	742	noncoding	-0.002048
transcript_HQ_sequal2_transcript13593/f2p0/902	903	noncoding	-0.024576
transcript_HQ_sequal2_transcript1726/f3p0/2198	2198	noncoding	-0.0856064
transcript_HQ_sequal2_transcript17260/f2p0/635	633	noncoding	-0.028672
transcript_HQ_sequal2_transcript16363/f3p0/697	697	noncoding	-0.0237568
transcript_HQ_sequal2_transcript10869/f2p0/1139	1139	noncoding	-0.0376832
transcript_HQ_sequal2_transcript15539/f2p0/761	761	noncoding	-0.0151552
transcript_HQ_sequal2_transcript13598/f2p0/906	906	noncoding	-0.0536576
transcript_HQ_sequal2_transcript16367/f4p0/701	701	noncoding	-0.032768
transcript_HQ_sequal2_transcript17264/f2p0/631	630	noncoding	-0.028672
transcript_HQ_sequal2_transcript16370/f3p0/704	702	noncoding	-0.024576
transcript_HQ_sequal2_transcript17269/f3p0/637	637	noncoding	-0.0167936
transcript_HQ_sequal2_transcript15549/f5p0/761	761	noncoding	-0.0151552
transcript_HQ_sequal2_transcript17274/f2p0/623	623	noncoding	-0.0131072
transcript_HQ_sequal2_transcript15553/f8p0/756	756	noncoding	-0.0385024
transcript_HQ_sequal2_transcript17276/f2p0/623	623	noncoding	-0.0610304
transcript_HQ_sequal2_transcript15563/f50p0/743	743	noncoding	-0.016384
transcript_HQ_sequal2_transcript10885/f5p0/1124	1124	noncoding	-0.008192
transcript_HQ_sequal2_transcript17286/f4p0/612	612	noncoding	-0.079872
transcript_HQ_sequal2_transcript15565/f3p0/749	749	noncoding	-0.069632
transcript_HQ_sequal2_transcript15567/f2p0/760	760	noncoding	-0.012288
transcript_HQ_sequal2_transcript10888/f2p0/1128	1128	noncoding	-0.0290816
transcript_HQ_sequal2_transcript16391/f7p0/690	690	noncoding	-0.0217088
transcript_HQ_sequal2_transcript17292/f3p0/594	593	noncoding	-0.016384
transcript_HQ_sequal2_transcript17299/f6p0/593	592	noncoding	-0.036864
transcript_HQ_sequal2_transcript10895/f4p0/1142	1142	noncoding	-0.049152
transcript_HQ_sequal2_transcript18175/f5p0/558	558	noncoding	-0.0192512
transcript_HQ_sequal2_transcript11796/f2p0/1021	1021	noncoding	-0.0311296
transcript_HQ_sequal2_transcript18186/f4p0/564	564	noncoding	-0.0610304
transcript_HQ_sequal2_transcript16404/f2p0/703	704	noncoding	-0.057344
transcript_HQ_sequal2_transcript17312/f15p0/593	593	noncoding	-0.0380928
transcript_HQ_sequal2_transcript19087/f2p0/488	488	noncoding	-0.0618496
transcript_HQ_sequal2_transcript16406/f2p0/695	694	noncoding	-0.002048
transcript_HQ_sequal2_transcript20005/f2p0/407	407	noncoding	-0.024576
transcript_HQ_sequal2_transcript19092/f10p0/497	497	noncoding	-0.024576
transcript_HQ_sequal2_transcript19094/f3p0/482	482	noncoding	-0.065536
transcript_HQ_sequal2_transcript19096/f2p0/489	489	noncoding	-0.01024
transcript_HQ_sequal2_transcript19097/f8p0/478	477	noncoding	-0.0364544
transcript_HQ_sequal2_transcript20013/f3p0/417	417	noncoding	-0.0004096
transcript_HQ_sequal2_transcript15585/f2p0/755	704	noncoding	-0.126976
transcript_HQ_sequal2_transcript20016/f2p0/397	397	noncoding	-0.0004096
transcript_HQ_sequal2_transcript18204/f2p0/562	562	noncoding	-0.0630784
transcript_HQ_sequal2_transcript18205/f2p0/570	570	noncoding	-0.004096
transcript_HQ_sequal2_transcript18206/f2p0/555	555	noncoding	-0.012288
transcript_HQ_sequal2_transcript18207/f4p0/555	555	noncoding	-0.0876544
transcript_HQ_sequal2_transcript18209/f13p0/553	553	noncoding	-0.118784
transcript_HQ_sequal2_transcript20020/f4p0/409	409	noncoding	-0.118374
transcript_HQ_sequal2_transcript16415/f2p0/692	692	noncoding	-0.479232
transcript_HQ_sequal2_transcript16416/f2p0/690	690	noncoding	-0.032768
transcript_HQ_sequal2_transcript17317/f2p0/627	627	noncoding	-0.0585728
transcript_HQ_sequal2_transcript19105/f2p0/486	486	noncoding	-0.0004096
transcript_HQ_sequal2_transcript17318/f2p0/627	627	noncoding	-0.032768
transcript_HQ_sequal2_transcript18210/f17p0/528	528	noncoding	-0.057344
transcript_HQ_sequal2_transcript17319/f2p0/618	617	noncoding	-0.053248
transcript_HQ_sequal2_transcript16419/f2p0/698	698	noncoding	-0.0303104
transcript_HQ_sequal2_transcript20025/f2p0/441	441	noncoding	-0.0319488
transcript_HQ_sequal2_transcript18212/f2p0/580	579	noncoding	-0.0004096
transcript_HQ_sequal2_transcript17320/f4p0/624	624	noncoding	-0.0270336
transcript_HQ_sequal2_transcript17321/f3p0/637	636	noncoding	-0.0004096
transcript_HQ_sequal2_transcript20032/f2p0/423	424	noncoding	-0.0004096
transcript_HQ_sequal2_transcript19111/f8p0/502	500	noncoding	-0.0208896
transcript_HQ_sequal2_transcript18214/f2p0/567	567	noncoding	-0.0159744
transcript_HQ_sequal2_transcript17325/f4p0/608	608	noncoding	-0.008192
transcript_HQ_sequal2_transcript18217/f6p0/555	555	noncoding	-0.03072
transcript_HQ_sequal2_transcript20036/f5p0/394	394	noncoding	-0.008192
transcript_HQ_sequal2_transcript17328/f10p0/622	621	noncoding	-0.053248
transcript_HQ_sequal2_transcript17329/f21p0/600	600	noncoding	-0.036864
transcript_HQ_sequal2_transcript20041/f23p0/376	376	noncoding	-0.147456
transcript_HQ_sequal2_transcript19118/f2p0/486	483	noncoding	-0.086016
transcript_HQ_sequal2_transcript18222/f2p0/557	557	noncoding	-0.0647168
transcript_HQ_sequal2_transcript18223/f16p0/516	516	noncoding	-0.024576
transcript_HQ_sequal2_transcript16430/f2p0/687	687	noncoding	-0.0577536
transcript_HQ_sequal2_transcript16432/f3p0/715	715	noncoding	-0.0053248
transcript_HQ_sequal2_transcript17336/f2p0/622	622	noncoding	-0.0131072
transcript_HQ_sequal2_transcript18230/f4p0/552	552	noncoding	-0.012288
transcript_HQ_sequal2_transcript20048/f2p0/416	409	noncoding	-0.0004096
transcript_HQ_sequal2_transcript20049/f2p0/409	409	noncoding	-0.0004096
transcript_HQ_sequal2_transcript19121/f4p0/478	477	noncoding	-0.077824
transcript_HQ_sequal2_transcript19123/f2p0/481	481	noncoding	-0.12288
transcript_HQ_sequal2_transcript20050/f2p0/406	406	noncoding	-0.0405504
transcript_HQ_sequal2_transcript1561/f2p0/2252	2252	noncoding	-0.0053248
transcript_HQ_sequal2_transcript18238/f2p0/557	557	noncoding	-0.0151552
transcript_HQ_sequal2_transcript19129/f2p0/484	483	noncoding	-0.0004096
transcript_HQ_sequal2_transcript16440/f2p0/689	688	noncoding	-0.073728
transcript_HQ_sequal2_transcript16442/f9p0/703	703	noncoding	-0.110592
transcript_HQ_sequal2_transcript20058/f12p0/421	421	noncoding	-0.0417792
transcript_HQ_sequal2_transcript16445/f26p0/629	629	noncoding	-0.002048
transcript_HQ_sequal2_transcript17347/f4p0/626	626	noncoding	-0.0094208
transcript_HQ_sequal2_transcript18245/f4p0/493	493	noncoding	-0.0303104
transcript_HQ_sequal2_transcript17348/f2p0/632	632	noncoding	-0.04096
transcript_HQ_sequal2_transcript18247/f6p0/551	551	noncoding	-0.0364544
transcript_HQ_sequal2_transcript20063/f3p0/407	407	noncoding	-0.0606208
transcript_HQ_sequal2_transcript1735/f7p0/2138	2137	noncoding	-0.0217088
transcript_HQ_sequal2_transcript16453/f2p0/690	690	noncoding	-0.0008192
transcript_HQ_sequal2_transcript17351/f2p0/618	617	noncoding	-0.022528
transcript_HQ_sequal2_transcript18254/f2p0/552	552	noncoding	-0.0004096
transcript_HQ_sequal2_transcript15623/f3p0/756	756	noncoding	-0.032768
transcript_HQ_sequal2_transcript17353/f4p0/619	619	noncoding	-0.12288
transcript_HQ_sequal2_transcript19147/f2p0/481	481	noncoding	-0.36864
transcript_HQ_sequal2_transcript18260/f11p0/549	551	noncoding	-0.0110592
transcript_HQ_sequal2_transcript16460/f2p0/693	693	noncoding	-0.139264
transcript_HQ_sequal2_transcript20082/f2p0/424	424	noncoding	-0.0827392
transcript_HQ_sequal2_transcript19155/f3p0/510	510	noncoding	-0.0339968
transcript_HQ_sequal2_transcript19157/f4p0/480	480	noncoding	-0.04096
transcript_HQ_sequal2_transcript19160/f2p0/484	484	noncoding	-0.004096
transcript_HQ_sequal2_transcript18269/f2p0/547	547	noncoding	-0.0053248
transcript_HQ_sequal2_transcript15635/f6p0/674	672	noncoding	-0.0004096
transcript_HQ_sequal2_transcript19165/f2p0/483	483	noncoding	-0.086016
transcript_HQ_sequal2_transcript18270/f2p0/549	547	noncoding	-0.0004096
transcript_HQ_sequal2_transcript16471/f4p0/687	687	noncoding	-0.0159744
transcript_HQ_sequal2_transcript20098/f2p0/404	404	noncoding	-0.0507904
transcript_HQ_sequal2_transcript17375/f2p0/621	621	noncoding	-0.036864
transcript_HQ_sequal2_transcript18281/f20p0/501	501	noncoding	-0.14336
transcript_HQ_sequal2_transcript16479/f3p0/693	693	noncoding	-0.0315392
transcript_HQ_sequal2_transcript15649/f2p0/745	745	noncoding	-0.0528384
transcript_HQ_sequal2_transcript18285/f2p0/550	547	noncoding	-0.0004096
transcript_HQ_sequal2_transcript18286/f3p0/569	568	noncoding	-0.0004096
transcript_HQ_sequal2_transcript17387/f2p0/620	616	noncoding	-0.0823296
transcript_HQ_sequal2_transcript19182/f3p0/478	478	noncoding	-0.0581632
transcript_HQ_sequal2_transcript19186/f2p0/482	483	noncoding	-0.098304
transcript_HQ_sequal2_transcript15654/f8p0/753	753	noncoding	-0.02048
transcript_HQ_sequal2_transcript16488/f3p0/661	661	noncoding	-0.06144
transcript_HQ_sequal2_transcript19187/f2p0/509	508	noncoding	-0.090112
transcript_HQ_sequal2_transcript20115/f2p0/407	407	noncoding	-0.0004096
transcript_HQ_sequal2_transcript17391/f2p0/584	584	noncoding	-0.0602112
transcript_HQ_sequal2_transcript17392/f7p0/625	625	noncoding	-0.022528
transcript_HQ_sequal2_transcript19190/f3p0/483	482	noncoding	-0.0290816
transcript_HQ_sequal2_transcript18295/f2p0/568	568	noncoding	-0.0344064
transcript_HQ_sequal2_transcript18296/f3p0/569	569	noncoding	-0.0937984
transcript_HQ_sequal2_transcript19193/f2p0/484	484	noncoding	-0.0004096
transcript_HQ_sequal2_transcript18299/f2p0/550	550	noncoding	-0.0897024
transcript_HQ_sequal2_transcript17396/f2p0/615	615	noncoding	-0.0339968
transcript_HQ_sequal2_transcript19196/f2p0/479	479	noncoding	-0.004096
transcript_HQ_sequal2_transcript20122/f3p0/424	424	noncoding	-0.0004096
transcript_HQ_sequal2_transcript17398/f3p0/715	715	noncoding	-0.024576
transcript_HQ_sequal2_transcript16495/f2p0/690	690	noncoding	-0.0794624
transcript_HQ_sequal2_transcript15665/f2p0/742	742	noncoding	-0.159744
transcript_HQ_sequal2_transcript20128/f2p0/402	402	noncoding	-0.0536576
transcript_HQ_sequal2_transcript18300/f2p0/546	546	noncoding	-0.0073728
transcript_HQ_sequal2_transcript16499/f2p0/678	671	noncoding	-0.0004096
transcript_HQ_sequal2_transcript17401/f2p0/617	617	noncoding	-0.06144
transcript_HQ_sequal2_transcript17402/f3p0/619	619	noncoding	-0.0004096
transcript_HQ_sequal2_transcript1567/f3p0/2248	2248	noncoding	-0.217088
transcript_HQ_sequal2_transcript17405/f2p0/631	630	noncoding	-0.028672
transcript_HQ_sequal2_transcript19203/f2p0/485	485	noncoding	-0.0004096
transcript_HQ_sequal2_transcript19207/f2p0/497	498	noncoding	-0.0004096
transcript_HQ_sequal2_transcript19208/f2p0/475	477	noncoding	-0.0004096
transcript_HQ_sequal2_transcript20142/f4p0/400	399	noncoding	-0.0679936
transcript_HQ_sequal2_transcript17411/f4p0/610	610	noncoding	-0.024576
transcript_HQ_sequal2_transcript17418/f4p0/621	620	noncoding	-0.004096
transcript_HQ_sequal2_transcript19213/f2p0/486	484	noncoding	-0.111411
transcript_HQ_sequal2_transcript19217/f2p0/478	478	noncoding	-0.067584
transcript_HQ_sequal2_transcript19219/f2p0/477	477	noncoding	-0.0196608
transcript_HQ_sequal2_transcript20152/f3p0/411	407	noncoding	-0.708608
transcript_HQ_sequal2_transcript15685/f4p0/751	751	noncoding	-0.0892928
transcript_HQ_sequal2_transcript16506/f4p0/700	700	noncoding	-0.004096
transcript_HQ_sequal2_transcript20155/f5p0/407	407	noncoding	-0.0004096
transcript_HQ_sequal2_transcript17424/f2p0/636	633	noncoding	-0.0315392
transcript_HQ_sequal2_transcript20158/f2p0/402	404	noncoding	-0.0004096
transcript_HQ_sequal2_transcript15689/f8p0/742	742	noncoding	-0.0167936
transcript_HQ_sequal2_transcript19223/f2p0/476	476	noncoding	-0.0004096
transcript_HQ_sequal2_transcript20159/f4p0/490	490	noncoding	-0.024576
transcript_HQ_sequal2_transcript1651/f2p0/2222	2214	noncoding	-0.004096
transcript_HQ_sequal2_transcript18331/f2p0/567	566	noncoding	-0.006144
transcript_HQ_sequal2_transcript19231/f2p0/479	479	noncoding	-0.0004096
transcript_HQ_sequal2_transcript18332/f2p0/559	559	noncoding	-0.11223
transcript_HQ_sequal2_transcript17437/f3p0/630	630	noncoding	-0.0335872
transcript_HQ_sequal2_transcript15698/f2p0/744	744	noncoding	-0.0114688
transcript_HQ_sequal2_transcript19234/f2p0/480	479	noncoding	-0.065536
transcript_HQ_sequal2_transcript16513/f2p0/688	687	noncoding	-0.0057344
transcript_HQ_sequal2_transcript19236/f4p0/520	520	noncoding	-0.065536
transcript_HQ_sequal2_transcript16521/f2p0/688	688	noncoding	-0.016384
transcript_HQ_sequal2_transcript19246/f2p0/473	473	noncoding	-0.0004096
transcript_HQ_sequal2_transcript18341/f3p0/545	545	noncoding	-0.0004096
transcript_HQ_sequal2_transcript16522/f2p0/709	709	noncoding	-0.0700416
transcript_HQ_sequal2_transcript16524/f3p0/684	684	noncoding	-0.016384
transcript_HQ_sequal2_transcript17444/f3p0/625	624	noncoding	-0.024576
transcript_HQ_sequal2_transcript20180/f2p0/410	410	noncoding	-0.0004096
transcript_HQ_sequal2_transcript18347/f9p0/541	541	noncoding	-0.016384
transcript_HQ_sequal2_transcript15706/f2p0/731	730	noncoding	-0.0380928
transcript_HQ_sequal2_transcript18348/f6p0/549	549	noncoding	-0.024576
transcript_HQ_sequal2_transcript17447/f2p0/612	610	noncoding	-0.106496
transcript_HQ_sequal2_transcript15709/f3p0/753	753	noncoding	-0.0118784
transcript_HQ_sequal2_transcript20188/f3p0/402	402	noncoding	-0.04096
transcript_HQ_sequal2_transcript19259/f2p0/475	476	noncoding	-0.012288
transcript_HQ_sequal2_transcript20192/f2p0/385	385	noncoding	-0.0004096
transcript_HQ_sequal2_transcript20198/f3p0/391	391	noncoding	-0.0004096
transcript_HQ_sequal2_transcript16541/f2p0/687	687	noncoding	-0.0073728
transcript_HQ_sequal2_transcript17455/f2p0/617	618	noncoding	-0.0851968
transcript_HQ_sequal2_transcript18358/f2p0/538	538	noncoding	-0.0118784
transcript_HQ_sequal2_transcript16545/f4p0/672	672	noncoding	-0.022528
transcript_HQ_sequal2_transcript20202/f11p0/407	407	noncoding	-0.077824
transcript_HQ_sequal2_transcript17460/f3p0/614	614	noncoding	-0.004096
transcript_HQ_sequal2_transcript20205/f3p0/416	416	noncoding	-0.0004096
transcript_HQ_sequal2_transcript19273/f2p0/479	476	noncoding	-0.0311296
transcript_HQ_sequal2_transcript18363/f3p0/560	560	noncoding	-0.0892928
transcript_HQ_sequal2_transcript17465/f6p0/611	611	noncoding	-0.0192512
transcript_HQ_sequal2_transcript17466/f4p0/631	631	noncoding	-0.0004096
transcript_HQ_sequal2_transcript19278/f19p0/423	423	noncoding	-0.221184
transcript_HQ_sequal2_transcript20219/f2p0/389	389	noncoding	-0.0167936
transcript_HQ_sequal2_transcript17475/f3p0/609	609	noncoding	-0.12288
transcript_HQ_sequal2_transcript19287/f47p0/437	437	noncoding	-0.065536
transcript_HQ_sequal2_transcript16559/f2p0/687	686	noncoding	-0.0606208
transcript_HQ_sequal2_transcript15738/f2p0/746	746	noncoding	-0.0405504
transcript_HQ_sequal2_transcript20231/f2p0/394	394	noncoding	-0.059392
transcript_HQ_sequal2_transcript17488/f13p0/569	569	noncoding	-0.028672
transcript_HQ_sequal2_transcript17494/f2p0/613	613	noncoding	-0.008192
transcript_HQ_sequal2_transcript19301/f2p0/470	471	noncoding	-0.0004096
transcript_HQ_sequal2_transcript17495/f2p0/612	612	noncoding	-0.0299008
transcript_HQ_sequal2_transcript20234/f2p0/402	394	noncoding	-0.0004096
transcript_HQ_sequal2_transcript19302/f17p0/380	380	noncoding	-0.322765
transcript_HQ_sequal2_transcript19303/f4p0/475	475	noncoding	-0.0253952
transcript_HQ_sequal2_transcript15747/f3p0/726	727	noncoding	-0.0339968
transcript_HQ_sequal2_transcript19308/f2p0/471	471	noncoding	-0.0004096
transcript_HQ_sequal2_transcript19309/f6p0/439	439	noncoding	-0.0004096
transcript_HQ_sequal2_transcript15749/f3p0/743	743	noncoding	-0.0016384
transcript_HQ_sequal2_transcript18388/f3p0/528	528	noncoding	-0.086016
transcript_HQ_sequal2_transcript1931/f12p0/2163	2161	noncoding	-0.016384
transcript_HQ_sequal2_transcript16578/f2p0/676	676	noncoding	-0.0618496
transcript_HQ_sequal2_transcript19312/f3p0/499	499	noncoding	-0.0008192
transcript_HQ_sequal2_transcript18390/f3p0/541	542	noncoding	-0.0356352
transcript_HQ_sequal2_transcript19314/f2p0/474	472	noncoding	-0.106496
transcript_HQ_sequal2_transcript15753/f14p0/711	711	noncoding	-0.0180224
transcript_HQ_sequal2_transcript19315/f6p0/468	468	noncoding	-0.0004096
transcript_HQ_sequal2_transcript20250/f5p0/389	389	noncoding	-0.0004096
transcript_HQ_sequal2_transcript19316/f2p0/472	472	noncoding	-0.065536
transcript_HQ_sequal2_transcript15755/f2p0/739	739	noncoding	-0.073728
transcript_HQ_sequal2_transcript20252/f2p0/387	388	noncoding	-0.0004096
transcript_HQ_sequal2_transcript20253/f2p0/391	391	noncoding	-0.0004096
transcript_HQ_sequal2_transcript18396/f2p0/552	553	noncoding	-0.0483328
transcript_HQ_sequal2_transcript18397/f3p0/542	541	noncoding	-0.0032768
transcript_HQ_sequal2_transcript20259/f2p0/385	385	noncoding	-0.0540672
transcript_HQ_sequal2_transcript16589/f3p0/688	688	noncoding	-0.0016384
transcript_HQ_sequal2_transcript15760/f2p0/734	734	noncoding	-0.0004096
transcript_HQ_sequal2_transcript15762/f7p0/754	754	noncoding	-0.208896
transcript_HQ_sequal2_transcript17505/f3p0/608	609	noncoding	-0.0036864
transcript_HQ_sequal2_transcript16591/f2p0/678	678	noncoding	-0.008192
transcript_HQ_sequal2_transcript20271/f2p0/383	383	noncoding	-0.0004096
transcript_HQ_sequal2_transcript20273/f3p0/388	388	noncoding	-0.2048
transcript_HQ_sequal2_transcript19329/f2p0/469	469	noncoding	-0.045056
transcript_HQ_sequal2_transcript20279/f2p0/385	385	noncoding	-0.0417792
transcript_HQ_sequal2_transcript16599/f3p0/779	779	noncoding	-0.036864
transcript_HQ_sequal2_transcript19331/f3p0/468	469	noncoding	-0.0008192
transcript_HQ_sequal2_transcript20285/f2p0/386	386	noncoding	-0.0872448
transcript_HQ_sequal2_transcript16600/f2p0/706	706	noncoding	-0.0016384
transcript_HQ_sequal2_transcript20289/f4p0/402	402	noncoding	-0.0004096
transcript_HQ_sequal2_transcript2029/f2p0/2145	2145	noncoding	-0.0581632
transcript_HQ_sequal2_transcript20290/f9p0/393	393	noncoding	-0.086016
transcript_HQ_sequal2_transcript16604/f2p0/679	679	noncoding	-0.032768
transcript_HQ_sequal2_transcript19342/f2p0/468	468	noncoding	-0.0004096
transcript_HQ_sequal2_transcript17524/f10p0/605	605	noncoding	-0.0135168
transcript_HQ_sequal2_transcript19347/f3p0/473	472	noncoding	-0.122061
transcript_HQ_sequal2_transcript19349/f8p0/482	483	noncoding	-0.08192
transcript_HQ_sequal2_transcript16609/f31p0/607	608	noncoding	-0.0565248
transcript_HQ_sequal2_transcript18422/f16p0/536	536	noncoding	-0.0536576
transcript_HQ_sequal2_transcript17530/f3p0/605	605	noncoding	-0.105267
transcript_HQ_sequal2_transcript2030/f3p0/2136	2137	noncoding	-0.0098304
transcript_HQ_sequal2_transcript18425/f8p0/622	623	noncoding	-0.018432
transcript_HQ_sequal2_transcript17534/f2p0/606	605	noncoding	-0.018432
transcript_HQ_sequal2_transcript20301/f2p0/384	384	noncoding	-0.077824
transcript_HQ_sequal2_transcript20306/f7p0/383	383	noncoding	-0.340378
transcript_HQ_sequal2_transcript19359/f2p0/473	473	noncoding	-0.0339968
transcript_HQ_sequal2_transcript18433/f2p0/535	535	noncoding	-0.178176
transcript_HQ_sequal2_transcript18435/f2p0/538	538	noncoding	-0.032768
transcript_HQ_sequal2_transcript20311/f21p0/319	319	noncoding	-0.02048
transcript_HQ_sequal2_transcript16613/f2p0/676	675	noncoding	-0.610304
transcript_HQ_sequal2_transcript16614/f3p0/676	676	noncoding	-0.0053248
transcript_HQ_sequal2_transcript19378/f7p0/461	456	noncoding	-0.0024576
transcript_HQ_sequal2_transcript17554/f4p0/606	607	noncoding	-0.057344
transcript_HQ_sequal2_transcript1938/f3p0/2162	2162	noncoding	-0.0188416
transcript_HQ_sequal2_transcript17555/f2p0/608	608	noncoding	-0.0004096
transcript_HQ_sequal2_transcript19382/f2p0/463	463	noncoding	-0.117965
transcript_HQ_sequal2_transcript19383/f5p0/453	450	noncoding	-0.069632
transcript_HQ_sequal2_transcript18444/f2p0/536	536	noncoding	-0.057344
transcript_HQ_sequal2_transcript18446/f2p0/537	537	noncoding	-0.135168
transcript_HQ_sequal2_transcript20341/f2p0/381	381	noncoding	-0.04096
transcript_HQ_sequal2_transcript18455/f2p0/539	539	noncoding	-0.0036864
transcript_HQ_sequal2_transcript19392/f2p0/460	459	noncoding	-0.0118784
transcript_HQ_sequal2_transcript1582/f4p0/2306	2306	noncoding	-0.0036864
transcript_HQ_sequal2_transcript19396/f12p0/456	457	noncoding	-0.0004096
transcript_HQ_sequal2_transcript20355/f2p0/426	426	noncoding	-0.0585728
transcript_HQ_sequal2_transcript20356/f4p0/381	381	noncoding	-0.02048
transcript_HQ_sequal2_transcript17573/f6p0/608	608	noncoding	-0.016384
transcript_HQ_sequal2_transcript20361/f2p0/402	398	noncoding	-0.04096
transcript_HQ_sequal2_transcript15825/f3p0/694	693	noncoding	-0.032768
transcript_HQ_sequal2_transcript20366/f2p0/377	377	noncoding	-0.313754
transcript_HQ_sequal2_transcript17578/f84p0/561	561	noncoding	-0.0229376
transcript_HQ_sequal2_transcript16643/f3p0/682	682	noncoding	-0.045056
transcript_HQ_sequal2_transcript20372/f15p0/331	331	noncoding	-0.049152
transcript_HQ_sequal2_transcript20374/f2p0/375	375	noncoding	-0.094208
transcript_HQ_sequal2_transcript19409/f3p0/466	466	noncoding	-0.0004096
transcript_HQ_sequal2_transcript20375/f4p0/371	371	noncoding	-0.438272
transcript_HQ_sequal2_transcript20376/f2p0/374	374	noncoding	-0.162611
transcript_HQ_sequal2_transcript18475/f13p0/525	525	noncoding	-0.12288
transcript_HQ_sequal2_transcript19413/f2p0/468	468	noncoding	-0.240026
transcript_HQ_sequal2_transcript20383/f2p0/372	372	noncoding	-0.069632
transcript_HQ_sequal2_transcript17594/f2p0/604	603	noncoding	-0.016384
transcript_HQ_sequal2_transcript20389/f2p0/372	372	noncoding	-0.008192
transcript_HQ_sequal2_transcript17597/f13p0/594	594	noncoding	-0.032768
transcript_HQ_sequal2_transcript15834/f4p0/751	751	noncoding	-0.0131072
transcript_HQ_sequal2_transcript16656/f4p0/666	666	noncoding	-0.0004096
transcript_HQ_sequal2_transcript18480/f2p0/538	539	noncoding	-0.06144
transcript_HQ_sequal2_transcript18487/f13p0/517	517	noncoding	-0.073728
transcript_HQ_sequal2_transcript19428/f2p0/471	471	noncoding	-0.176128
transcript_HQ_sequal2_transcript18488/f36p0/470	470	noncoding	-0.032768
transcript_HQ_sequal2_transcript18489/f5p0/531	530	noncoding	-0.004096
transcript_HQ_sequal2_transcript204/f2p0/3139	3139	noncoding	-0.0147456
transcript_HQ_sequal2_transcript18492/f7p0/539	539	noncoding	-0.028672
transcript_HQ_sequal2_transcript20402/f11p0/374	374	noncoding	-0.0659456
transcript_HQ_sequal2_transcript15842/f2p0/731	733	noncoding	-0.0196608
transcript_HQ_sequal2_transcript16667/f2p0/674	674	noncoding	-0.053248
transcript_HQ_sequal2_transcript15844/f2p0/735	735	noncoding	-0.249856
transcript_HQ_sequal2_transcript17609/f2p0/602	602	noncoding	-0.0073728
transcript_HQ_sequal2_transcript20408/f2p0/368	368	noncoding	-0.0458752
transcript_HQ_sequal2_transcript15846/f3p0/734	734	noncoding	-0.016384
transcript_HQ_sequal2_transcript19440/f4p0/464	464	noncoding	-0.128614
transcript_HQ_sequal2_transcript15849/f2p0/735	735	noncoding	-0.0233472
transcript_HQ_sequal2_transcript20411/f7p0/374	374	noncoding	-0.098304
transcript_HQ_sequal2_transcript19443/f2p0/453	453	noncoding	-0.0004096
transcript_HQ_sequal2_transcript19447/f2p0/462	462	noncoding	-0.126566
transcript_HQ_sequal2_transcript20418/f3p0/382	382	noncoding	-0.012288
transcript_HQ_sequal2_transcript18504/f6p0/543	542	noncoding	-0.036864
transcript_HQ_sequal2_transcript19449/f3p0/457	456	noncoding	-0.008192
transcript_HQ_sequal2_transcript17617/f3p0/605	605	noncoding	-0.08192
transcript_HQ_sequal2_transcript18506/f3p0/598	593	noncoding	-0.08192
transcript_HQ_sequal2_transcript16679/f2p0/672	672	noncoding	-0.024576
transcript_HQ_sequal2_transcript19452/f2p0/461	461	noncoding	-0.0192512
transcript_HQ_sequal2_transcript20428/f2p0/389	389	noncoding	-0.282624
transcript_HQ_sequal2_transcript16680/f2p0/694	693	noncoding	-0.0503808
transcript_HQ_sequal2_transcript19457/f9p0/454	454	noncoding	-0.0098304
transcript_HQ_sequal2_transcript16682/f4p0/675	675	noncoding	-0.014336
transcript_HQ_sequal2_transcript16684/f7p0/672	669	noncoding	-0.0118784
transcript_HQ_sequal2_transcript16685/f2p0/672	672	noncoding	-0.012288
transcript_HQ_sequal2_transcript18513/f2p0/542	542	noncoding	-0.0806912
transcript_HQ_sequal2_transcript19462/f2p0/473	473	noncoding	-0.104858
transcript_HQ_sequal2_transcript19466/f2p0/461	461	noncoding	-0.0004096
transcript_HQ_sequal2_transcript18516/f2p0/542	542	noncoding	-0.057344
transcript_HQ_sequal2_transcript19469/f2p0/466	466	noncoding	-0.114688
transcript_HQ_sequal2_transcript16691/f2p0/672	672	noncoding	-0.0622592
transcript_HQ_sequal2_transcript20451/f2p0/371	371	noncoding	-0.0004096
transcript_HQ_sequal2_transcript19471/f2p0/457	457	noncoding	-0.0475136
transcript_HQ_sequal2_transcript19473/f7p0/466	466	noncoding	-0.032768
transcript_HQ_sequal2_transcript19479/f3p0/457	457	noncoding	-0.0180224
transcript_HQ_sequal2_transcript18526/f4p0/544	543	noncoding	-0.008192
transcript_HQ_sequal2_transcript20465/f2p0/371	371	noncoding	-0.02048
transcript_HQ_sequal2_transcript20466/f2p0/395	395	noncoding	-0.14336
transcript_HQ_sequal2_transcript16697/f3p0/673	673	noncoding	-0.0004096
transcript_HQ_sequal2_transcript19485/f3p0/453	453	noncoding	-0.0753664
transcript_HQ_sequal2_transcript18530/f2p0/534	534	noncoding	-0.0004096
transcript_HQ_sequal2_transcript19487/f2p0/466	466	noncoding	-0.0004096
transcript_HQ_sequal2_transcript15872/f7p0/717	717	noncoding	-0.012288
transcript_HQ_sequal2_transcript20472/f3p0/358	356	noncoding	-0.0004096
transcript_HQ_sequal2_transcript17644/f2p0/595	596	noncoding	-0.18432
transcript_HQ_sequal2_transcript17647/f10p0/572	572	noncoding	-0.08192
transcript_HQ_sequal2_transcript2048/f4p0/1964	1964	noncoding	-0.0335872
transcript_HQ_sequal2_transcript19497/f9p0/451	451	noncoding	-0.0581632
transcript_HQ_sequal2_transcript18542/f10p0/519	517	noncoding	-0.1024
transcript_HQ_sequal2_transcript15885/f4p0/737	737	noncoding	-0.073728
transcript_HQ_sequal2_transcript17652/f3p0/595	595	noncoding	-0.14336
transcript_HQ_sequal2_transcript20494/f2p0/361	361	noncoding	-0.0004096
transcript_HQ_sequal2_transcript19503/f2p0/480	480	noncoding	-0.0978944
transcript_HQ_sequal2_transcript20496/f3p0/361	360	noncoding	-0.0004096
transcript_HQ_sequal2_transcript20499/f2p0/362	362	noncoding	-0.0004096
transcript_HQ_sequal2_transcript15892/f2p0/732	732	noncoding	-0.004096
transcript_HQ_sequal2_transcript18554/f14p0/521	521	noncoding	-0.0385024
transcript_HQ_sequal2_transcript17660/f5p0/597	597	noncoding	-0.0118784
transcript_HQ_sequal2_transcript18555/f2p0/529	529	noncoding	-0.004096
transcript_HQ_sequal2_transcript16706/f5p0/662	662	noncoding	-0.0049152
transcript_HQ_sequal2_transcript18557/f2p0/552	552	noncoding	-0.141722
transcript_HQ_sequal2_transcript18559/f2p0/525	525	noncoding	-0.036864
transcript_HQ_sequal2_transcript15896/f2p0/729	729	noncoding	-0.069632
transcript_HQ_sequal2_transcript20510/f3p0/361	361	noncoding	-0.0004096
transcript_HQ_sequal2_transcript19521/f8p0/453	453	noncoding	-0.0253952
transcript_HQ_sequal2_transcript17678/f2p0/594	594	noncoding	-0.024576
transcript_HQ_sequal2_transcript20518/f6p0/357	357	noncoding	-0.0004096
transcript_HQ_sequal2_transcript19528/f2p0/453	453	noncoding	-0.135168
transcript_HQ_sequal2_transcript20520/f2p0/360	359	noncoding	-0.0004096
transcript_HQ_sequal2_transcript19531/f2p0/460	460	noncoding	-0.0114688
transcript_HQ_sequal2_transcript20521/f2p0/369	368	noncoding	-0.229376
transcript_HQ_sequal2_transcript19537/f2p0/472	472	noncoding	-0.0438272
transcript_HQ_sequal2_transcript18567/f4p0/524	524	noncoding	-0.04096
transcript_HQ_sequal2_transcript19539/f2p0/449	449	noncoding	-0.094208
transcript_HQ_sequal2_transcript16727/f14p0/669	667	noncoding	-0.0028672
transcript_HQ_sequal2_transcript20529/f3p0/361	361	noncoding	-0.1024
transcript_HQ_sequal2_transcript17683/f2p0/612	610	noncoding	-0.008192
transcript_HQ_sequal2_transcript19543/f4p0/452	452	noncoding	-0.0319488
transcript_HQ_sequal2_transcript19544/f2p0/450	450	noncoding	-0.0004096
transcript_HQ_sequal2_transcript16736/f6p0/667	666	noncoding	-0.0241664
transcript_HQ_sequal2_transcript16737/f2p0/665	665	noncoding	-0.0200704
transcript_HQ_sequal2_transcript18581/f2p0/532	532	noncoding	-0.0659456
transcript_HQ_sequal2_transcript19553/f2p0/415	416	noncoding	-0.098304
transcript_HQ_sequal2_transcript19555/f2p0/447	447	noncoding	-0.0004096
transcript_HQ_sequal2_transcript15912/f2p0/724	724	noncoding	-0.0114688
transcript_HQ_sequal2_transcript18586/f6p0/466	467	noncoding	-0.094208
transcript_HQ_sequal2_transcript17695/f22p0/558	558	noncoding	-0.0315392
transcript_HQ_sequal2_transcript18588/f3p0/531	532	noncoding	-0.012288
transcript_HQ_sequal2_transcript17698/f91p0/558	558	noncoding	-0.0004096
transcript_HQ_sequal2_transcript15916/f3p0/724	724	noncoding	-0.0176128
transcript_HQ_sequal2_transcript16744/f269p0/619	619	noncoding	-0.008192
transcript_HQ_sequal2_transcript20555/f5p0/340	340	noncoding	-0.0647168
transcript_HQ_sequal2_transcript20556/f2p0/357	356	noncoding	-0.0004096
transcript_HQ_sequal2_transcript20561/f2p0/355	354	noncoding	-0.0004096
transcript_HQ_sequal2_transcript19577/f3p0/471	468	noncoding	-0.0004096
transcript_HQ_sequal2_transcript20566/f3p0/356	357	noncoding	-0.0004096
transcript_HQ_sequal2_transcript16754/f2p0/663	663	noncoding	-0.06144
transcript_HQ_sequal2_transcript19579/f2p0/448	448	noncoding	-0.0827392
transcript_HQ_sequal2_transcript16759/f5p0/666	666	noncoding	-0.065536
transcript_HQ_sequal2_transcript20573/f2p0/358	358	noncoding	-0.114688
transcript_HQ_sequal2_transcript15929/f2p0/729	729	noncoding	-0.073728
transcript_HQ_sequal2_transcript20574/f2p0/353	353	noncoding	-0.0004096
transcript_HQ_sequal2_transcript17712/f5p0/595	596	noncoding	-0.0585728
transcript_HQ_sequal2_transcript19593/f2p0/454	454	noncoding	-0.0004096
transcript_HQ_sequal2_transcript17715/f14p0/581	580	noncoding	-0.0339968
transcript_HQ_sequal2_transcript196/f3p0/3163	3163	noncoding	-0.359629
transcript_HQ_sequal2_transcript16766/f2p0/670	670	noncoding	-0.0008192
transcript_HQ_sequal2_transcript1772/f8p0/2200	2200	noncoding	-0.034816
transcript_HQ_sequal2_transcript19602/f2p0/444	443	noncoding	-0.012288
transcript_HQ_sequal2_transcript17725/f2p0/608	607	noncoding	-0.0024576
transcript_HQ_sequal2_transcript17727/f7p0/591	591	noncoding	-0.094208
transcript_HQ_sequal2_transcript19609/f3p0/448	447	noncoding	-0.124518
transcript_HQ_sequal2_transcript18603/f2p0/490	471	noncoding	-0.0090112
transcript_HQ_sequal2_transcript17730/f2p0/618	618	noncoding	-0.0200704
transcript_HQ_sequal2_transcript15949/f3p0/731	731	noncoding	-0.026624
transcript_HQ_sequal2_transcript18607/f2p0/524	523	noncoding	-0.0405504
transcript_HQ_sequal2_transcript17732/f3p0/541	542	noncoding	-0.065536
transcript_HQ_sequal2_transcript16777/f2p0/691	690	noncoding	-0.0004096
transcript_HQ_sequal2_transcript18609/f3p0/550	551	noncoding	-0.0086016
transcript_HQ_sequal2_transcript17734/f2p0/597	598	noncoding	-0.0249856
transcript_HQ_sequal2_transcript20615/f2p0/347	347	noncoding	-0.0004096
transcript_HQ_sequal2_transcript20619/f2p0/375	374	noncoding	-0.1024
transcript_HQ_sequal2_transcript17737/f5p0/588	588	noncoding	-0.0311296
transcript_HQ_sequal2_transcript15952/f3p0/723	723	noncoding	-0.0159744
transcript_HQ_sequal2_transcript20623/f2p0/366	365	noncoding	-0.0004096
transcript_HQ_sequal2_transcript15957/f3p0/724	724	noncoding	-0.0667648
transcript_HQ_sequal2_transcript16781/f52p0/630	630	noncoding	-0.0385024
transcript_HQ_sequal2_transcript17741/f4p0/595	595	noncoding	-0.294912
transcript_HQ_sequal2_transcript19629/f6p0/435	435	noncoding	-0.045056
transcript_HQ_sequal2_transcript17745/f33p0/557	557	noncoding	-0.004096
transcript_HQ_sequal2_transcript20630/f2p0/361	359	noncoding	-0.02048
transcript_HQ_sequal2_transcript15963/f3p0/832	832	noncoding	-0.0139264
transcript_HQ_sequal2_transcript20634/f2p0/344	344	noncoding	-0.0405504
transcript_HQ_sequal2_transcript17751/f2p0/592	592	noncoding	-0.0004096
transcript_HQ_sequal2_transcript15969/f2p0/729	729	noncoding	-0.045056
transcript_HQ_sequal2_transcript19640/f2p0/439	439	noncoding	-0.06144
transcript_HQ_sequal2_transcript16787/f9p0/666	666	noncoding	-0.036864
transcript_HQ_sequal2_transcript17752/f94p0/541	540	noncoding	-0.012288
transcript_HQ_sequal2_transcript16789/f2p0/660	660	noncoding	-0.117555
transcript_HQ_sequal2_transcript15970/f2p0/731	732	noncoding	-0.0724992
transcript_HQ_sequal2_transcript20642/f2p0/349	349	noncoding	-0.0004096
transcript_HQ_sequal2_transcript19644/f2p0/439	439	noncoding	-0.108134
transcript_HQ_sequal2_transcript17755/f2p0/596	596	noncoding	-0.0200704
transcript_HQ_sequal2_transcript16790/f2p0/659	659	noncoding	-0.0589824
transcript_HQ_sequal2_transcript15976/f3p0/722	724	noncoding	-0.004096
transcript_HQ_sequal2_transcript18638/f2p0/538	538	noncoding	-0.129434
transcript_HQ_sequal2_transcript20654/f3p0/370	370	noncoding	-0.06144
transcript_HQ_sequal2_transcript18639/f2p0/522	522	noncoding	-0.024576
transcript_HQ_sequal2_transcript16795/f3p0/674	674	noncoding	-0.0049152
transcript_HQ_sequal2_transcript17761/f27p0/562	562	noncoding	-0.012288
transcript_HQ_sequal2_transcript18644/f4p0/517	517	noncoding	-0.303104
transcript_HQ_sequal2_transcript15980/f2p0/738	738	noncoding	-0.0512
transcript_HQ_sequal2_transcript17763/f8p0/615	615	noncoding	-0.0557056
transcript_HQ_sequal2_transcript18647/f3p0/547	547	noncoding	-0.0208896
transcript_HQ_sequal2_transcript17765/f2p0/615	615	noncoding	-0.0344064
transcript_HQ_sequal2_transcript18648/f2p0/532	532	noncoding	-0.0090112
transcript_HQ_sequal2_transcript20662/f2p0/345	345	noncoding	-0.118784
transcript_HQ_sequal2_transcript16801/f3p0/666	666	noncoding	-0.016384
transcript_HQ_sequal2_transcript19667/f4p0/436	436	noncoding	-0.032768
transcript_HQ_sequal2_transcript19669/f3p0/440	440	noncoding	-0.104858
transcript_HQ_sequal2_transcript18657/f2p0/518	518	noncoding	-0.0004096
transcript_HQ_sequal2_transcript17771/f2p0/588	586	noncoding	-0.088064
transcript_HQ_sequal2_transcript20673/f2p0/345	346	noncoding	-0.0004096
transcript_HQ_sequal2_transcript18660/f2p0/548	548	noncoding	-0.0413696
transcript_HQ_sequal2_transcript20677/f2p0/353	354	noncoding	-0.0004096
transcript_HQ_sequal2_transcript18661/f7p0/521	521	noncoding	-0.028672
transcript_HQ_sequal2_transcript17774/f3p0/592	592	noncoding	-0.0090112
transcript_HQ_sequal2_transcript15992/f2p0/723	723	noncoding	-0.0110592
transcript_HQ_sequal2_transcript19676/f2p0/438	438	noncoding	-0.02048
transcript_HQ_sequal2_transcript17778/f33p0/574	574	noncoding	-0.0229376
transcript_HQ_sequal2_transcript18668/f5p0/525	525	noncoding	-0.065536
transcript_HQ_sequal2_transcript16818/f5p0/662	662	noncoding	-0.167936
transcript_HQ_sequal2_transcript17780/f2p0/586	585	noncoding	-0.0241664
transcript_HQ_sequal2_transcript18672/f5p0/526	528	noncoding	-0.024576
transcript_HQ_sequal2_transcript18673/f3p0/523	523	noncoding	-0.229376
transcript_HQ_sequal2_transcript19685/f2p0/440	440	noncoding	-0.016384
transcript_HQ_sequal2_transcript20696/f5p0/349	349	noncoding	-0.0004096
transcript_HQ_sequal2_transcript18676/f4p0/528	526	noncoding	-0.0057344
transcript_HQ_sequal2_transcript19693/f3p0/449	449	noncoding	-0.08192
transcript_HQ_sequal2_transcript19696/f2p0/438	438	noncoding	-0.0004096
transcript_HQ_sequal2_transcript20704/f3p0/345	345	noncoding	-0.016384
transcript_HQ_sequal2_transcript20705/f3p0/346	346	noncoding	-0.0004096
transcript_HQ_sequal2_transcript19699/f2p0/443	442	noncoding	-0.0335872
transcript_HQ_sequal2_transcript16007/f2p0/730	729	noncoding	-0.012288
transcript_HQ_sequal2_transcript18682/f4p0/532	533	noncoding	-0.0393216
transcript_HQ_sequal2_transcript18685/f2p0/519	519	noncoding	-0.034816
transcript_HQ_sequal2_transcript16823/f2p0/651	651	noncoding	-0.0139264
transcript_HQ_sequal2_transcript18687/f2p0/520	520	noncoding	-0.090112
transcript_HQ_sequal2_transcript16824/f2p0/673	674	noncoding	-0.0270336
transcript_HQ_sequal2_transcript20727/f2p0/357	357	noncoding	-0.069632
transcript_HQ_sequal2_transcript16014/f4p0/749	750	noncoding	-0.0557056
transcript_HQ_sequal2_transcript16019/f2p0/719	719	noncoding	-0.073728
transcript_HQ_sequal2_transcript19719/f2p0/436	436	noncoding	-0.0077824
transcript_HQ_sequal2_transcript16022/f7p0/729	728	noncoding	-0.0049152
transcript_HQ_sequal2_transcript16025/f2p0/718	720	noncoding	-0.012288
transcript_HQ_sequal2_transcript20743/f2p0/341	341	noncoding	-0.04096
transcript_HQ_sequal2_transcript16843/f4p0/657	657	noncoding	-0.016384
transcript_HQ_sequal2_transcript19736/f2p0/455	455	noncoding	-0.0167936
transcript_HQ_sequal2_transcript19738/f3p0/436	436	noncoding	-0.0356352
transcript_HQ_sequal2_transcript18690/f25p0/497	497	noncoding	-0.02048
transcript_HQ_sequal2_transcript16850/f2p0/666	666	noncoding	-0.02048
transcript_HQ_sequal2_transcript18691/f5p0/538	538	noncoding	-0.0618496
transcript_HQ_sequal2_transcript18694/f2p0/515	515	noncoding	-0.014336
transcript_HQ_sequal2_transcript16033/f3p0/731	731	noncoding	-0.016384
transcript_HQ_sequal2_transcript18695/f2p0/519	519	noncoding	-0.0004096
transcript_HQ_sequal2_transcript16854/f10p0/662	662	noncoding	-0.0229376
transcript_HQ_sequal2_transcript18699/f2p0/517	517	noncoding	-0.008192
transcript_HQ_sequal2_transcript16855/f2p0/651	651	noncoding	-0.0004096
transcript_HQ_sequal2_transcript19747/f2p0/401	398	noncoding	-0.049152
transcript_HQ_sequal2_transcript19748/f2p0/434	434	noncoding	-0.0802816
transcript_HQ_sequal2_transcript20767/f6p0/356	356	noncoding	-0.049152
transcript_HQ_sequal2_transcript16037/f2p0/723	720	noncoding	-0.0512
transcript_HQ_sequal2_transcript18700/f21p0/453	453	noncoding	-0.0802816
transcript_HQ_sequal2_transcript20777/f2p0/326	326	noncoding	-0.004096
transcript_HQ_sequal2_transcript16862/f3p0/659	659	noncoding	-0.101581
transcript_HQ_sequal2_transcript18703/f2p0/542	542	noncoding	-0.183501
transcript_HQ_sequal2_transcript18704/f2p0/517	517	noncoding	-0.0004096
transcript_HQ_sequal2_transcript19759/f2p0/438	437	noncoding	-0.164659
transcript_HQ_sequal2_transcript20785/f6p0/330	330	noncoding	-0.0004096
transcript_HQ_sequal2_transcript20786/f2p0/334	334	noncoding	-0.0913408
transcript_HQ_sequal2_transcript1976/f2p0/2152	2152	noncoding	-0.0253952
transcript_HQ_sequal2_transcript20788/f3p0/332	332	noncoding	-0.073728
transcript_HQ_sequal2_transcript20789/f3p0/356	356	noncoding	-0.0004096
transcript_HQ_sequal2_transcript19766/f2p0/437	437	noncoding	-0.107315
transcript_HQ_sequal2_transcript20793/f7p0/352	352	noncoding	-0.024576
transcript_HQ_sequal2_transcript18707/f3p0/512	512	noncoding	-0.06144
transcript_HQ_sequal2_transcript19773/f2p0/434	434	noncoding	-0.167936
transcript_HQ_sequal2_transcript19779/f3p0/453	453	noncoding	-0.069632
transcript_HQ_sequal2_transcript18710/f5p0/537	537	noncoding	-0.0335872
transcript_HQ_sequal2_transcript18712/f3p0/518	518	noncoding	-0.0004096
transcript_HQ_sequal2_transcript18713/f2p0/530	528	noncoding	-0.126976
transcript_HQ_sequal2_transcript19788/f2p0/428	428	noncoding	-0.200704
transcript_HQ_sequal2_transcript16052/f2p0/719	719	noncoding	-0.108954
transcript_HQ_sequal2_transcript19794/f2p0/427	427	noncoding	-0.114278
transcript_HQ_sequal2_transcript20819/f2p0/331	331	noncoding	-0.0004096
transcript_HQ_sequal2_transcript16055/f2p0/713	713	noncoding	-0.0237568
transcript_HQ_sequal2_transcript18726/f10p0/504	504	noncoding	-0.0167936
transcript_HQ_sequal2_transcript19799/f3p0/441	441	noncoding	-0.0004096
transcript_HQ_sequal2_transcript19800/f5p0/453	453	noncoding	-0.04096
transcript_HQ_sequal2_transcript18733/f3p0/517	513	noncoding	-0.065536
transcript_HQ_sequal2_transcript16061/f5p0/733	733	noncoding	-0.0098304
transcript_HQ_sequal2_transcript16062/f7p0/721	720	noncoding	-0.045056
transcript_HQ_sequal2_transcript19804/f2p0/437	437	noncoding	-0.0004096
transcript_HQ_sequal2_transcript18737/f2p0/511	511	noncoding	-0.008192
transcript_HQ_sequal2_transcript20847/f2p0/314	314	noncoding	-0.008192
transcript_HQ_sequal2_transcript16067/f3p0/717	718	noncoding	-0.0565248
transcript_HQ_sequal2_transcript20849/f4p0/328	328	noncoding	-0.0524288
transcript_HQ_sequal2_transcript16899/f5p0/649	649	noncoding	-0.028672
transcript_HQ_sequal2_transcript19817/f2p0/422	423	noncoding	-0.0446464
transcript_HQ_sequal2_transcript19818/f3p0/428	428	noncoding	-0.139264
transcript_HQ_sequal2_transcript18742/f5p0/518	518	noncoding	-0.0774144
transcript_HQ_sequal2_transcript20859/f2p0/325	325	noncoding	-0.135168
transcript_HQ_sequal2_transcript16073/f2p0/714	714	noncoding	-0.024576
transcript_HQ_sequal2_transcript18747/f11p0/513	513	noncoding	-0.0139264
transcript_HQ_sequal2_transcript16076/f2p0/721	722	noncoding	-0.012288
transcript_HQ_sequal2_transcript20862/f2p0/324	324	noncoding	-0.110592
transcript_HQ_sequal2_transcript18750/f2p0/511	511	noncoding	-0.028672
transcript_HQ_sequal2_transcript16082/f4p0/709	709	noncoding	-0.0544768
transcript_HQ_sequal2_transcript20872/f3p0/326	327	noncoding	-0.057344
transcript_HQ_sequal2_transcript20877/f2p0/322	322	noncoding	-0.0004096
transcript_HQ_sequal2_transcript18766/f2p0/512	512	noncoding	-0.069632
transcript_HQ_sequal2_transcript18767/f2p0/508	508	noncoding	-0.012288
transcript_HQ_sequal2_transcript16093/f2p0/719	719	noncoding	-0.004096
transcript_HQ_sequal2_transcript17799/f2p0/587	587	noncoding	-0.08192
transcript_HQ_sequal2_transcript20888/f2p0/321	321	noncoding	-0.0004096
transcript_HQ_sequal2_transcript20892/f2p0/319	319	noncoding	-0.0004096
transcript_HQ_sequal2_transcript1780/f4p0/2225	2225	noncoding	-0.0098304
transcript_HQ_sequal2_transcript16103/f3p0/714	714	noncoding	-0.0004096
transcript_HQ_sequal2_transcript2090/f2p0/2140	2140	noncoding	-0.249856
transcript_HQ_sequal2_transcript18782/f4p0/507	507	noncoding	-0.0434176
transcript_HQ_sequal2_transcript18783/f2p0/527	527	noncoding	-0.0741376
transcript_HQ_sequal2_transcript20906/f2p0/322	322	noncoding	-0.0004096
transcript_HQ_sequal2_transcript20907/f2p0/324	325	noncoding	-0.0004096
transcript_HQ_sequal2_transcript18786/f3p0/506	506	noncoding	-0.0528384
transcript_HQ_sequal2_transcript18787/f2p0/508	508	noncoding	-0.0229376
transcript_HQ_sequal2_transcript18788/f2p0/512	512	noncoding	-0.073728
transcript_HQ_sequal2_transcript17811/f6p0/605	605	noncoding	-0.0004096
transcript_HQ_sequal2_transcript20912/f2p0/318	318	noncoding	-0.0004096
transcript_HQ_sequal2_transcript17813/f2p0/596	596	noncoding	-0.0004096
transcript_HQ_sequal2_transcript18790/f6p0/493	495	noncoding	-0.04096
transcript_HQ_sequal2_transcript17816/f3p0/582	582	noncoding	-0.063488
transcript_HQ_sequal2_transcript18793/f46p0/429	429	noncoding	-0.032768
transcript_HQ_sequal2_transcript20922/f2p0/314	314	noncoding	-0.0004096
transcript_HQ_sequal2_transcript20924/f2p0/318	318	noncoding	-0.09216
transcript_HQ_sequal2_transcript19824/f2p0/445	445	noncoding	-0.0004096
transcript_HQ_sequal2_transcript19825/f2p0/430	430	noncoding	-0.0049152
transcript_HQ_sequal2_transcript17823/f3p0/536	536	noncoding	-0.036864
transcript_HQ_sequal2_transcript18799/f2p0/509	508	noncoding	-0.149094
transcript_HQ_sequal2_transcript16122/f2p0/715	715	noncoding	-0.0999424
transcript_HQ_sequal2_transcript17828/f2p0/569	569	noncoding	-0.006144
transcript_HQ_sequal2_transcript16911/f2p0/654	654	noncoding	-0.04096
transcript_HQ_sequal2_transcript19838/f2p0/459	459	noncoding	-0.0004096
transcript_HQ_sequal2_transcript16917/f2p0/660	660	noncoding	-0.0516096
transcript_HQ_sequal2_transcript17834/f2p0/602	598	noncoding	-0.077824
transcript_HQ_sequal2_transcript17837/f2p0/584	584	noncoding	-0.028672
transcript_HQ_sequal2_transcript19842/f2p0/425	426	noncoding	-0.0319488
transcript_HQ_sequal2_transcript19843/f2p0/431	431	noncoding	-0.02048
transcript_HQ_sequal2_transcript19844/f5p0/425	425	noncoding	-0.0126976
transcript_HQ_sequal2_transcript18815/f4p0/507	507	noncoding	-0.047104
transcript_HQ_sequal2_transcript18816/f169p0/458	458	noncoding	-0.0241664
transcript_HQ_sequal2_transcript17839/f2p0/557	557	noncoding	-0.077824
transcript_HQ_sequal2_transcript19845/f2p0/424	424	noncoding	-0.0004096
transcript_HQ_sequal2_transcript19848/f6p0/444	444	noncoding	-0.012288
transcript_HQ_sequal2_transcript17841/f2p0/609	609	noncoding	-0.0290816
transcript_HQ_sequal2_transcript17843/f2p0/568	568	noncoding	-0.02048
transcript_HQ_sequal2_transcript17847/f5p0/581	581	noncoding	-0.0425984
transcript_HQ_sequal2_transcript20966/f7p0/311	313	noncoding	-0.065536
transcript_HQ_sequal2_transcript19858/f2p0/425	425	noncoding	-0.0974848
transcript_HQ_sequal2_transcript19859/f2p0/440	440	noncoding	-0.0016384
transcript_HQ_sequal2_transcript16933/f2p0/650	650	noncoding	-0.0602112
transcript_HQ_sequal2_transcript18830/f2p0/513	513	noncoding	-0.012288
transcript_HQ_sequal2_transcript17850/f2p0/582	582	noncoding	-0.016384
transcript_HQ_sequal2_transcript20984/f2p0/307	307	noncoding	-0.0004096
transcript_HQ_sequal2_transcript16938/f8p0/653	651	noncoding	-0.086016
transcript_HQ_sequal2_transcript19875/f2p0/425	425	noncoding	-0.098304
transcript_HQ_sequal2_transcript2099/f3p0/2129	2128	noncoding	-0.012288
transcript_HQ_sequal2_transcript20990/f4p0/312	312	noncoding	-0.0004096
transcript_HQ_sequal2_transcript16941/f43p0/615	615	noncoding	-0.0413696
transcript_HQ_sequal2_transcript16943/f2p0/641	641	noncoding	-0.0110592
transcript_HQ_sequal2_transcript17861/f22p0/556	556	noncoding	-0.04096
transcript_HQ_sequal2_transcript18832/f2p0/548	531	noncoding	-0.02048
transcript_HQ_sequal2_transcript19887/f5p0/420	420	noncoding	-0.228147
transcript_HQ_sequal2_transcript19891/f3p0/422	422	noncoding	-0.0069632
transcript_HQ_sequal2_transcript21001/f4p0/354	354	noncoding	-0.0004096
transcript_HQ_sequal2_transcript21002/f2p0/306	306	noncoding	-0.069632
transcript_HQ_sequal2_transcript19894/f2p0/403	403	noncoding	-0.309248
transcript_HQ_sequal2_transcript21005/f2p0/308	309	noncoding	-0.0004096
transcript_HQ_sequal2_transcript16162/f18p0/704	704	noncoding	-0.0303104
transcript_HQ_sequal2_transcript21011/f2p0/306	306	noncoding	-0.0004096
transcript_HQ_sequal2_transcript19897/f2p0/449	447	noncoding	-0.27607
transcript_HQ_sequal2_transcript17877/f2p0/582	582	noncoding	-0.079872
transcript_HQ_sequal2_transcript21019/f2p0/309	309	noncoding	-0.0004096
transcript_HQ_sequal2_transcript16170/f11p0/711	711	noncoding	-0.0004096
transcript_HQ_sequal2_transcript19903/f2p0/431	431	noncoding	-0.024576
transcript_HQ_sequal2_transcript17881/f5p0/580	580	noncoding	-0.04096
transcript_HQ_sequal2_transcript17883/f5p0/545	545	noncoding	-0.055296
transcript_HQ_sequal2_transcript18849/f2p0/500	498	noncoding	-0.14377
transcript_HQ_sequal2_transcript19908/f2p0/443	442	noncoding	-0.008192
transcript_HQ_sequal2_transcript19910/f9p0/416	416	noncoding	-0.012288
transcript_HQ_sequal2_transcript19913/f2p0/419	421	noncoding	-0.120832
transcript_HQ_sequal2_transcript21033/f4p0/329	328	noncoding	-0.0004096
transcript_HQ_sequal2_transcript21034/f4p0/303	303	noncoding	-0.0004096
transcript_HQ_sequal2_transcript16960/f6p0/650	650	noncoding	-0.1024
transcript_HQ_sequal2_transcript21042/f2p0/301	301	noncoding	-0.0004096
transcript_HQ_sequal2_transcript21046/f2p0/319	319	noncoding	-0.0004096
transcript_HQ_sequal2_transcript21049/f2p0/314	314	noncoding	-0.0004096
transcript_HQ_sequal2_transcript19920/f2p0/420	421	noncoding	-0.090112
transcript_HQ_sequal2_transcript16185/f2p0/718	718	noncoding	-0.004096
transcript_HQ_sequal2_transcript18861/f3p0/534	534	noncoding	-0.0540672
transcript_HQ_sequal2_transcript19925/f2p0/417	417	noncoding	-0.180224
transcript_HQ_sequal2_transcript17897/f8p0/587	587	noncoding	-0.0118784
transcript_HQ_sequal2_transcript18864/f2p0/519	519	noncoding	-0.126976
transcript_HQ_sequal2_transcript19928/f2p0/416	416	noncoding	-0.0458752
transcript_HQ_sequal2_transcript19932/f12p0/398	398	noncoding	-0.065536
transcript_HQ_sequal2_transcript21058/f12p0/306	305	noncoding	-0.0004096
transcript_HQ_sequal2_transcript18871/f3p0/503	503	noncoding	-0.02048
transcript_HQ_sequal2_transcript16192/f2p0/693	689	noncoding	-0.0106496
transcript_HQ_sequal2_transcript21069/f3p0/328	328	noncoding	-0.0004096
transcript_HQ_sequal2_transcript19936/f3p0/367	356	noncoding	-0.069632
transcript_HQ_sequal2_transcript21070/f2p0/292	292	noncoding	-0.0004096
transcript_HQ_sequal2_transcript16977/f37p0/514	514	noncoding	-0.0004096
transcript_HQ_sequal2_transcript1888/f4p0/2163	2163	noncoding	-0.0405504
transcript_HQ_sequal2_transcript16979/f2p0/642	642	noncoding	-0.028672
transcript_HQ_sequal2_transcript16981/f2p0/646	643	noncoding	-0.04096
transcript_HQ_sequal2_transcript16200/f7p0/670	670	noncoding	-0.086016
transcript_HQ_sequal2_transcript19950/f3p0/441	441	noncoding	-0.0004096
transcript_HQ_sequal2_transcript16203/f2p0/707	708	noncoding	-0.0319488
transcript_HQ_sequal2_transcript17918/f6p0/574	574	noncoding	-0.016384
transcript_HQ_sequal2_transcript19956/f7p0/410	410	noncoding	-0.0155648
transcript_HQ_sequal2_transcript17919/f2p0/582	582	noncoding	-0.004096
transcript_HQ_sequal2_transcript16995/f526p0/554	554	noncoding	-0.0258048
transcript_HQ_sequal2_transcript17922/f6p0/559	559	noncoding	-0.0884736
transcript_HQ_sequal2_transcript16997/f3p0/642	642	noncoding	-0.045056
transcript_HQ_sequal2_transcript19962/f2p0/421	424	noncoding	-0.0741376
transcript_HQ_sequal2_transcript18899/f8p0/485	485	noncoding	-0.04096
transcript_HQ_sequal2_transcript21107/f2p0/321	321	noncoding	-0.170394
transcript_HQ_sequal2_transcript21108/f2p0/298	298	noncoding	-0.053248
transcript_HQ_sequal2_transcript21109/f2p0/297	297	noncoding	-0.0004096
transcript_HQ_sequal2_transcript16214/f2p0/713	713	noncoding	-0.0069632
transcript_HQ_sequal2_transcript19973/f2p0/413	412	noncoding	-0.04096
transcript_HQ_sequal2_transcript19975/f2p0/422	422	noncoding	-0.0004096
transcript_HQ_sequal2_transcript19979/f2p0/421	421	noncoding	-0.0126976
transcript_HQ_sequal2_transcript17932/f14p0/560	560	noncoding	-0.0126976
transcript_HQ_sequal2_transcript16219/f2p0/684	683	noncoding	-0.0004096
transcript_HQ_sequal2_transcript21123/f9p0/303	303	noncoding	-0.0004096
transcript_HQ_sequal2_transcript17002/f26p0/608	608	noncoding	-0.0421888
transcript_HQ_sequal2_transcript21124/f2p0/292	293	noncoding	-0.0004096
transcript_HQ_sequal2_transcript16222/f2p0/713	712	noncoding	-0.057344
transcript_HQ_sequal2_transcript19984/f2p0/418	417	noncoding	-0.0585728
transcript_HQ_sequal2_transcript16224/f2p0/720	721	noncoding	-0.0315392
transcript_HQ_sequal2_transcript17937/f4p0/576	576	noncoding	-0.0004096
transcript_HQ_sequal2_transcript16226/f2p0/708	708	noncoding	-0.065536
transcript_HQ_sequal2_transcript17008/f2p0/645	645	noncoding	-0.0016384
transcript_HQ_sequal2_transcript16228/f45p0/602	600	noncoding	-0.008192
transcript_HQ_sequal2_transcript17011/f2p0/652	652	noncoding	-0.0094208
transcript_HQ_sequal2_transcript17012/f3p0/649	649	noncoding	-0.008192
transcript_HQ_sequal2_transcript19988/f2p0/404	404	noncoding	-0.0004096
transcript_HQ_sequal2_transcript21132/f2p0/294	294	noncoding	-0.0004096
transcript_HQ_sequal2_transcript17942/f2p0/579	579	noncoding	-0.008192
transcript_HQ_sequal2_transcript21136/f2p0/293	293	noncoding	-0.0004096
transcript_HQ_sequal2_transcript17946/f3p0/603	602	noncoding	-0.06144
transcript_HQ_sequal2_transcript17016/f2p0/647	647	noncoding	-0.032768
transcript_HQ_sequal2_transcript16234/f2p0/708	705	noncoding	-0.13271
transcript_HQ_sequal2_transcript17954/f5p0/575	575	noncoding	-0.119603
transcript_HQ_sequal2_transcript16239/f13p0/628	628	noncoding	-0.008192
transcript_HQ_sequal2_transcript17955/f2p0/595	595	noncoding	-0.0217088
transcript_HQ_sequal2_transcript17021/f2p0/649	649	noncoding	-0.0196608
transcript_HQ_sequal2_transcript17958/f2p0/578	578	noncoding	-0.147456
transcript_HQ_sequal2_transcript17025/f2p0/645	645	noncoding	-0.0004096
transcript_HQ_sequal2_transcript17026/f6p0/646	646	noncoding	-0.0004096
transcript_HQ_sequal2_transcript18906/f2p0/513	513	noncoding	-0.02048
transcript_HQ_sequal2_transcript18907/f5p0/488	488	noncoding	-0.049152
transcript_HQ_sequal2_transcript17964/f10p0/535	535	noncoding	-0.0098304
transcript_HQ_sequal2_transcript17030/f13p0/647	646	noncoding	-0.0438272
transcript_HQ_sequal2_transcript21166/f2p0/294	294	noncoding	-0.0004096
transcript_HQ_sequal2_transcript21167/f2p0/285	285	noncoding	-0.012288
transcript_HQ_sequal2_transcript21168/f4p0/285	285	noncoding	-0.0004096
transcript_HQ_sequal2_transcript17031/f3p0/666	666	noncoding	-0.008192
transcript_HQ_sequal2_transcript18910/f2p0/516	516	noncoding	-0.0004096
transcript_HQ_sequal2_transcript18911/f3p0/500	500	noncoding	-0.0323584
transcript_HQ_sequal2_transcript16250/f3p0/708	708	noncoding	-0.0004096
transcript_HQ_sequal2_transcript21171/f4p0/305	305	noncoding	-0.0004096
transcript_HQ_sequal2_transcript16251/f4p0/660	661	noncoding	-0.0073728
transcript_HQ_sequal2_transcript18915/f2p0/500	500	noncoding	-0.131891
transcript_HQ_sequal2_transcript21173/f2p0/274	275	noncoding	-0.187597
transcript_HQ_sequal2_transcript17036/f8p0/664	664	noncoding	-0.0258048
transcript_HQ_sequal2_transcript16253/f2p0/703	704	noncoding	-0.032768
transcript_HQ_sequal2_transcript16254/f2p0/697	697	noncoding	-0.0049152
transcript_HQ_sequal2_transcript21181/f5p0/302	302	noncoding	-0.0004096
transcript_HQ_sequal2_transcript21184/f2p0/285	285	noncoding	-0.0004096
transcript_HQ_sequal2_transcript17041/f9p0/633	633	noncoding	-0.0180224
transcript_HQ_sequal2_transcript18920/f3p0/504	501	noncoding	-0.0253952
transcript_HQ_sequal2_transcript18924/f2p0/498	498	noncoding	-0.0565248
transcript_HQ_sequal2_transcript17980/f20p0/528	528	noncoding	-0.057344
transcript_HQ_sequal2_transcript21193/f3p0/294	294	noncoding	-0.0004096
transcript_HQ_sequal2_transcript17986/f5p0/571	571	noncoding	-0.0155648
transcript_HQ_sequal2_transcript16262/f4p0/708	709	noncoding	-0.114688
transcript_HQ_sequal2_transcript17053/f7p0/638	637	noncoding	-0.0098304
transcript_HQ_sequal2_transcript18938/f2p0/506	505	noncoding	-0.004096
transcript_HQ_sequal2_transcript17058/f2p0/653	652	noncoding	-0.036864
transcript_HQ_sequal2_transcript21203/f2p0/301	301	noncoding	-0.0851968
transcript_HQ_sequal2_transcript21205/f2p0/286	286	noncoding	-0.0004096
transcript_HQ_sequal2_transcript21208/f2p0/284	284	noncoding	-0.0004096
transcript_HQ_sequal2_transcript21209/f2p0/279	279	noncoding	-0.0004096
transcript_HQ_sequal2_transcript21210/f3p0/297	297	noncoding	-0.0004096
transcript_HQ_sequal2_transcript18945/f3p0/501	500	noncoding	-0.094208
transcript_HQ_sequal2_transcript21214/f3p0/281	281	noncoding	-0.0004096
transcript_HQ_sequal2_transcript17069/f2p0/645	645	noncoding	-0.0335872
transcript_HQ_sequal2_transcript16281/f2p0/705	704	noncoding	-0.0651264
transcript_HQ_sequal2_transcript18952/f2p0/497	497	noncoding	-0.114688
transcript_HQ_sequal2_transcript18953/f14p0/490	489	noncoding	-0.053248
transcript_HQ_sequal2_transcript21221/f4p0/277	277	noncoding	-0.0004096
transcript_HQ_sequal2_transcript17072/f2p0/615	614	noncoding	-0.189235
transcript_HQ_sequal2_transcript21235/f2p0/288	288	noncoding	-0.0004096
transcript_HQ_sequal2_transcript16285/f2p0/609	609	noncoding	-0.0344064
transcript_HQ_sequal2_transcript21241/f2p0/279	278	noncoding	-0.0004096
transcript_HQ_sequal2_transcript18974/f3p0/495	495	noncoding	-0.140083
transcript_HQ_sequal2_transcript21248/f5p0/280	280	noncoding	-0.0004096
transcript_HQ_sequal2_transcript18018/f2p0/572	571	noncoding	-0.212992
transcript_HQ_sequal2_transcript16294/f2p0/700	700	noncoding	-0.0167936
transcript_HQ_sequal2_transcript17082/f2p0/656	656	noncoding	-0.0380928
transcript_HQ_sequal2_transcript17083/f8p0/652	652	noncoding	-0.0802816
transcript_HQ_sequal2_transcript17084/f8p0/626	625	noncoding	-0.036864
transcript_HQ_sequal2_transcript21257/f2p0/268	268	noncoding	-0.0004096
transcript_HQ_sequal2_transcript18023/f4p0/574	574	noncoding	-0.0073728
transcript_HQ_sequal2_transcript21262/f2p0/280	281	noncoding	-0.0004096
transcript_HQ_sequal2_transcript21265/f4p0/275	275	noncoding	-0.0004096
transcript_HQ_sequal2_transcript21266/f4p0/268	268	noncoding	-0.0004096
transcript_HQ_sequal2_transcript17090/f7p0/638	637	noncoding	-0.0008192
transcript_HQ_sequal2_transcript21271/f2p0/266	266	noncoding	-0.0004096
transcript_HQ_sequal2_transcript21272/f2p0/270	270	noncoding	-0.0004096
transcript_HQ_sequal2_transcript21274/f2p0/272	273	noncoding	-0.0004096
transcript_HQ_sequal2_transcript18990/f3p0/494	494	noncoding	-0.016384
transcript_HQ_sequal2_transcript18032/f8p0/569	569	noncoding	-0.069632
transcript_HQ_sequal2_transcript16306/f8p0/724	725	noncoding	-0.0425984
transcript_HQ_sequal2_transcript18035/f4p0/585	585	noncoding	-0.0421888
transcript_HQ_sequal2_transcript18037/f2p0/534	532	noncoding	-0.107315
transcript_HQ_sequal2_transcript18038/f2p0/563	563	noncoding	-0.0008192
transcript_HQ_sequal2_transcript21282/f2p0/277	277	noncoding	-0.155648
transcript_HQ_sequal2_transcript18039/f2p0/483	483	noncoding	-0.0315392
transcript_HQ_sequal2_transcript18999/f5p0/497	497	noncoding	-0.053248
transcript_HQ_sequal2_transcript16310/f47p0/680	680	noncoding	-0.0004096
transcript_HQ_sequal2_transcript21290/f4p0/264	264	noncoding	-0.0004096
transcript_HQ_sequal2_transcript16312/f3p0/728	729	noncoding	-0.0110592
transcript_HQ_sequal2_transcript21301/f3p0/259	259	noncoding	-0.0004096
transcript_HQ_sequal2_transcript21302/f4p0/274	274	noncoding	-1.0199
transcript_HQ_sequal2_transcript21305/f2p0/267	267	noncoding	-0.24535
transcript_HQ_sequal2_transcript17101/f2p0/641	641	noncoding	-0.0147456
transcript_HQ_sequal2_transcript18049/f2p0/570	570	noncoding	-0.0684032
transcript_HQ_sequal2_transcript21318/f2p0/274	274	noncoding	-0.0004096
transcript_HQ_sequal2_transcript17109/f8p0/621	621	noncoding	-0.0434176
transcript_HQ_sequal2_transcript21321/f3p0/264	264	noncoding	-0.209306
transcript_HQ_sequal2_transcript16323/f4p0/681	681	noncoding	-0.077824
transcript_HQ_sequal2_transcript18056/f2p0/584	584	noncoding	-0.0008192
transcript_HQ_sequal2_transcript19002/f3p0/496	496	noncoding	-0.012288
transcript_HQ_sequal2_transcript21327/f2p0/258	258	noncoding	-0.0004096
transcript_HQ_sequal2_transcript19010/f2p0/489	489	noncoding	-0.002048
transcript_HQ_sequal2_transcript21337/f2p0/261	261	noncoding	-0.0004096
transcript_HQ_sequal2_transcript21338/f5p0/272	272	noncoding	-0.028672
transcript_HQ_sequal2_transcript19016/f3p0/490	490	noncoding	-0.110592
transcript_HQ_sequal2_transcript19017/f7p0/499	499	noncoding	-0.0004096
transcript_HQ_sequal2_transcript21340/f4p0/239	239	noncoding	-0.0004096
transcript_HQ_sequal2_transcript17117/f2p0/649	648	noncoding	-0.018432
transcript_HQ_sequal2_transcript21341/f3p0/269	269	noncoding	-0.0004096
transcript_HQ_sequal2_transcript21344/f2p0/263	263	noncoding	-0.0004096
transcript_HQ_sequal2_transcript19020/f2p0/494	495	noncoding	-0.0344064
transcript_HQ_sequal2_transcript19021/f2p0/489	489	noncoding	-0.212992
transcript_HQ_sequal2_transcript19023/f2p0/490	490	noncoding	-0.131072
transcript_HQ_sequal2_transcript19025/f3p0/491	491	noncoding	-0.0274432
transcript_HQ_sequal2_transcript21352/f2p0/264	264	noncoding	-0.0004096
transcript_HQ_sequal2_transcript16336/f353p0/624	624	noncoding	-0.045056
transcript_HQ_sequal2_transcript21359/f2p0/255	255	noncoding	-0.0004096
transcript_HQ_sequal2_transcript18072/f2p0/590	590	noncoding	-0.016384
transcript_HQ_sequal2_transcript19031/f4p0/484	483	noncoding	-0.106906
transcript_HQ_sequal2_transcript19033/f2p0/506	507	noncoding	-0.158106
transcript_HQ_sequal2_transcript19034/f2p0/497	497	noncoding	-0.06144
transcript_HQ_sequal2_transcript19038/f5p0/505	504	noncoding	-0.0126976
transcript_HQ_sequal2_transcript19039/f2p0/489	489	noncoding	-0.0065536
transcript_HQ_sequal2_transcript18082/f5p0/578	578	noncoding	-0.055296
transcript_HQ_sequal2_transcript17129/f11p0/615	615	noncoding	-0.0270336
transcript_HQ_sequal2_transcript18089/f4p0/545	546	noncoding	-0.028672
transcript_HQ_sequal2_transcript19042/f10p0/494	495	noncoding	-0.0004096
transcript_HQ_sequal2_transcript21388/f2p0/247	247	noncoding	-0.0004096
transcript_HQ_sequal2_transcript17137/f2p0/636	636	noncoding	-0.077824
transcript_HQ_sequal2_transcript17138/f2p0/635	635	noncoding	-0.069632
transcript_HQ_sequal2_transcript21392/f2p0/249	249	noncoding	-0.0004096
transcript_HQ_sequal2_transcript19049/f7p0/491	491	noncoding	-0.016384
transcript_HQ_sequal2_transcript21397/f2p0/246	246	noncoding	-0.0004096
transcript_HQ_sequal2_transcript18093/f2p0/565	565	noncoding	-0.036864
transcript_HQ_sequal2_transcript19053/f2p0/494	494	noncoding	-0.0086016
transcript_HQ_sequal2_transcript19057/f4p0/496	496	noncoding	-0.169165
transcript_HQ_sequal2_transcript19059/f8p0/493	493	noncoding	-0.012288
transcript_HQ_sequal2_transcript21414/f8p0/243	243	noncoding	-0.0004096
transcript_HQ_sequal2_transcript17145/f4p0/651	651	noncoding	-0.0991232
transcript_HQ_sequal2_transcript19061/f2p0/517	517	noncoding	-0.065536
transcript_HQ_sequal2_transcript19064/f2p0/487	487	noncoding	-0.106496
transcript_HQ_sequal2_transcript17149/f2p0/639	635	noncoding	-0.053248
transcript_HQ_sequal2_transcript21432/f2p0/238	238	noncoding	-0.0004096
transcript_HQ_sequal2_transcript19069/f3p0/457	457	noncoding	-0.069632
transcript_HQ_sequal2_transcript18108/f20p0/558	558	noncoding	-0.026624
transcript_HQ_sequal2_transcript19071/f9p0/484	484	noncoding	-0.024576
transcript_HQ_sequal2_transcript21438/f2p0/251	251	noncoding	-0.0004096
transcript_HQ_sequal2_transcript21442/f4p0/255	255	noncoding	-0.0004096
transcript_HQ_sequal2_transcript17156/f4p0/644	644	noncoding	-0.04096
transcript_HQ_sequal2_transcript17157/f3p0/659	662	noncoding	-0.06144
transcript_HQ_sequal2_transcript21451/f2p0/234	234	noncoding	-0.0004096
transcript_HQ_sequal2_transcript21455/f2p0/234	234	noncoding	-0.0004096
transcript_HQ_sequal2_transcript18121/f14p0/567	566	noncoding	-0.0294912
transcript_HQ_sequal2_transcript18122/f5p0/572	572	noncoding	-0.0053248
transcript_HQ_sequal2_transcript18124/f7p0/563	563	noncoding	-0.024576
transcript_HQ_sequal2_transcript18126/f2p0/552	552	noncoding	-0.0503808
transcript_HQ_sequal2_transcript18129/f3p0/568	567	noncoding	-0.094208
transcript_HQ_sequal2_transcript21470/f2p0/232	232	noncoding	-0.0004096
transcript_HQ_sequal2_transcript21476/f2p0/249	249	noncoding	-0.0004096
transcript_HQ_sequal2_transcript18133/f9p0/559	559	noncoding	-0.192512
transcript_HQ_sequal2_transcript17170/f5p0/645	646	noncoding	-0.0004096
transcript_HQ_sequal2_transcript18136/f3p0/559	559	noncoding	-0.0118784
transcript_HQ_sequal2_transcript18137/f3p0/565	565	noncoding	-0.057344
transcript_HQ_sequal2_transcript18138/f4p0/561	561	noncoding	-0.0110592
transcript_HQ_sequal2_transcript18139/f2p0/559	559	noncoding	-0.0155648
transcript_HQ_sequal2_transcript17173/f4p0/639	639	noncoding	-0.0356352
transcript_HQ_sequal2_transcript17174/f2p0/622	620	noncoding	-0.0106496
transcript_HQ_sequal2_transcript18145/f4p0/642	642	noncoding	-0.0135168
transcript_HQ_sequal2_transcript18146/f2p0/586	586	noncoding	-0.0004096
transcript_HQ_sequal2_transcript21500/f2p0/226	226	noncoding	-0.0004096
transcript_HQ_sequal2_transcript21505/f2p0/223	223	noncoding	-0.045056
transcript_HQ_sequal2_transcript18148/f2p0/560	560	noncoding	-0.057344
transcript_HQ_sequal2_transcript17180/f3p0/649	649	noncoding	-0.0319488
transcript_HQ_sequal2_transcript18151/f2p0/588	589	noncoding	-0.0073728
transcript_HQ_sequal2_transcript21512/f2p0/228	228	noncoding	-0.098304
transcript_HQ_sequal2_transcript17186/f2p0/634	634	noncoding	-0.0622592
transcript_HQ_sequal2_transcript21519/f2p0/221	221	noncoding	-0.0004096
transcript_HQ_sequal2_transcript18157/f2p0/565	565	noncoding	-0.0053248
transcript_HQ_sequal2_transcript21540/f2p0/216	216	noncoding	-0.0004096
transcript_HQ_sequal2_transcript21546/f2p0/217	217	noncoding	-0.0004096
transcript_HQ_sequal2_transcript21548/f2p0/214	214	noncoding	-0.0004096
transcript_HQ_sequal2_transcript21549/f2p0/214	214	noncoding	-0.0004096
transcript_HQ_sequal2_transcript21552/f2p0/221	221	noncoding	-0.0004096
transcript_HQ_sequal2_transcript21553/f2p0/219	218	noncoding	-0.0004096
transcript_HQ_sequal2_transcript17188/f2p0/597	582	noncoding	-0.0106496
transcript_HQ_sequal2_transcript17191/f3p0/650	650	noncoding	-0.0761856
transcript_HQ_sequal2_transcript17196/f7p0/631	631	noncoding	-0.0065536
transcript_HQ_sequal2_transcript21598/f2p0/200	200	noncoding	-0.0004096
transcript_HQ_sequal2_transcript17201/f4p0/586	586	noncoding	-0.026624
transcript_HQ_sequal2_transcript17204/f2p0/635	635	noncoding	-0.016384
transcript_HQ_sequal2_transcript3172/f2p0/1935	1935	noncoding	-0.0090112
transcript_HQ_sequal2_transcript21620/f2p0/194	194	noncoding	-0.0004096
transcript_HQ_sequal2_transcript21625/f2p0/196	196	noncoding	-0.0004096
transcript_HQ_sequal2_transcript21626/f2p0/195	195	noncoding	-0.0004096
transcript_HQ_sequal2_transcript17214/f4p0/642	640	noncoding	-0.024576
transcript_HQ_sequal2_transcript17217/f2p0/631	631	noncoding	-0.0352256
transcript_HQ_sequal2_transcript17219/f5p0/638	637	noncoding	-0.0036864
transcript_HQ_sequal2_transcript21647/f2p0/186	186	noncoding	-0.0004096
transcript_HQ_sequal2_transcript4089/f2p0/1829	1831	noncoding	-0.0196608
transcript_HQ_sequal2_transcript17222/f3p0/628	628	noncoding	-0.0569344
transcript_HQ_sequal2_transcript17223/f2p0/629	629	noncoding	-0.0004096
transcript_HQ_sequal2_transcript17228/f7p0/626	626	noncoding	-0.036864
transcript_HQ_sequal2_transcript21672/f3p0/178	178	noncoding	-0.0004096
transcript_HQ_sequal2_transcript17229/f4p0/634	633	noncoding	-0.0172032
transcript_HQ_sequal2_transcript21677/f5p0/174	174	noncoding	-0.0004096
transcript_HQ_sequal2_transcript17233/f3p0/631	629	noncoding	-0.06144
transcript_HQ_sequal2_transcript21681/f2p0/173	173	noncoding	-0.0004096
transcript_HQ_sequal2_transcript4094/f5p0/1827	1828	noncoding	-0.0208896
transcript_HQ_sequal2_transcript17235/f2p0/631	630	noncoding	-0.0167936
transcript_HQ_sequal2_transcript21688/f2p0/170	170	noncoding	-0.0004096
transcript_HQ_sequal2_transcript21690/f3p0/188	188	noncoding	-0.0004096
transcript_HQ_sequal2_transcript2171/f3p0/2123	2122	noncoding	-0.0073728
transcript_HQ_sequal2_transcript21711/f4p0/182	182	noncoding	-0.0004096
transcript_HQ_sequal2_transcript21715/f2p0/158	158	noncoding	-0.0004096
transcript_HQ_sequal2_transcript21720/f2p0/152	152	noncoding	-0.2048
transcript_HQ_sequal2_transcript2334/f2p0/2062	2062	noncoding	-0.002048
transcript_HQ_sequal2_transcript5871/f2p0/1634	1634	noncoding	-0.0561152
transcript_HQ_sequal2_transcript21741/f2p0/143	143	noncoding	-0.192512
transcript_HQ_sequal2_transcript21788/f2p0/86	86	noncoding	-0.290816
transcript_HQ_sequal2_transcript5882/f2p0/1611	1611	noncoding	-0.0008192
transcript_HQ_sequal2_transcript4116/f2p0/1824	1824	noncoding	-0.018432
transcript_HQ_sequal2_transcript3203/f2p0/1934	1934	noncoding	-0.0090112
transcript_HQ_sequal2_transcript2356/f8p0/2073	2073	noncoding	-0.008192
transcript_HQ_sequal2_transcript5896/f2p0/1629	1628	noncoding	-0.03072
transcript_HQ_sequal2_transcript2197/f9p0/2112	2112	noncoding	-0.0438272
transcript_HQ_sequal2_transcript2372/f2p0/2056	2058	noncoding	-0.0172032
transcript_HQ_sequal2_transcript5909/f8p0/1614	1613	noncoding	-0.036864
transcript_HQ_sequal2_transcript2202/f2p0/2101	2102	noncoding	-0.036864
transcript_HQ_sequal2_transcript2387/f2p0/2086	2086	noncoding	-0.0004096
transcript_HQ_sequal2_transcript4161/f5p0/1805	1808	noncoding	-0.0241664
transcript_HQ_sequal2_transcript5029/f2p0/1718	1718	noncoding	-0.004096
transcript_HQ_sequal2_transcript4169/f2p0/1802	1802	noncoding	-0.004096
transcript_HQ_sequal2_transcript5946/f2p0/1621	1621	noncoding	-0.018432
transcript_HQ_sequal2_transcript6800/f3p0/1528	1528	noncoding	-0.0233472
transcript_HQ_sequal2_transcript2419/f2p0/2083	2078	noncoding	-0.0098304
transcript_HQ_sequal2_transcript4197/f7p0/1787	1787	noncoding	-0.0155648
transcript_HQ_sequal2_transcript3267/f2p0/1936	1936	noncoding	-0.0004096
transcript_HQ_sequal2_transcript2425/f2p0/2058	2059	noncoding	-0.0118784
transcript_HQ_sequal2_transcript5067/f2p0/1730	1730	noncoding	-0.02048
transcript_HQ_sequal2_transcript2432/f2p0/2085	2086	noncoding	-0.0114688
transcript_HQ_sequal2_transcript5956/f2p0/1378	1323	noncoding	-0.0356352
transcript_HQ_sequal2_transcript422/f2p0/2848	2848	noncoding	-0.0319488
transcript_HQ_sequal2_transcript5090/f3p0/1720	1718	noncoding	-0.0221184
transcript_HQ_sequal2_transcript2452/f3p0/2046	2047	noncoding	-0.004096
transcript_HQ_sequal2_transcript6847/f3p0/1539	1536	noncoding	-0.004096
transcript_HQ_sequal2_transcript5979/f3p0/1582	1582	noncoding	-0.0126976
transcript_HQ_sequal2_transcript5983/f4p0/1593	1593	noncoding	-0.0004096
transcript_HQ_sequal2_transcript5109/f2p0/1703	1704	noncoding	-0.135168
transcript_HQ_sequal2_transcript5986/f2p0/1626	1626	noncoding	-0.0376832
transcript_HQ_sequal2_transcript4243/f2p0/1749	1742	noncoding	-0.016384
transcript_HQ_sequal2_transcript2477/f3p0/2048	2047	noncoding	-0.04096
transcript_HQ_sequal2_transcript6881/f11p0/1520	1520	noncoding	-0.0106496
transcript_HQ_sequal2_transcript6884/f4p0/1532	1532	noncoding	-0.0806912
transcript_HQ_sequal2_transcript5126/f2p0/1642	1604	noncoding	-0.0229376
transcript_HQ_sequal2_transcript6890/f2p0/1512	1512	noncoding	-0.0118784
transcript_HQ_sequal2_transcript2500/f2p0/2047	2047	noncoding	-0.02048
transcript_HQ_sequal2_transcript6900/f2p0/1523	1523	noncoding	-0.04096
transcript_HQ_sequal2_transcript6904/f2p0/1522	1523	noncoding	-0.0339968
transcript_HQ_sequal2_transcript4275/f2p0/1789	1789	noncoding	-0.0397312
transcript_HQ_sequal2_transcript6908/f2p0/1516	1516	noncoding	-0.0176128
transcript_HQ_sequal2_transcript6911/f4p0/1518	1517	noncoding	-0.0045056
transcript_HQ_sequal2_transcript6015/f2p0/1624	1621	noncoding	-0.012288
transcript_HQ_sequal2_transcript6917/f4p0/1511	1511	noncoding	-0.0004096
transcript_HQ_sequal2_transcript5155/f3p0/1701	1701	noncoding	-0.0073728
transcript_HQ_sequal2_transcript3334/f3p0/1922	1922	noncoding	-0.0278528
transcript_HQ_sequal2_transcript3336/f2p0/1912	1909	noncoding	-0.0585728
transcript_HQ_sequal2_transcript2531/f3p0/1959	1959	noncoding	-0.0114688
transcript_HQ_sequal2_transcript5176/f2p0/1697	1697	noncoding	-0.0155648
transcript_HQ_sequal2_transcript6047/f2p0/1596	1596	noncoding	-0.0028672
transcript_HQ_sequal2_transcript5179/f2p0/1696	1694	noncoding	-0.0253952
transcript_HQ_sequal2_transcript6949/f9p0/1540	1537	noncoding	-0.0741376
transcript_HQ_sequal2_transcript6953/f3p0/1478	1478	noncoding	-0.0258048
transcript_HQ_sequal2_transcript6055/f6p0/1584	1584	noncoding	-0.0229376
transcript_HQ_sequal2_transcript336/f2p0/2919	2920	noncoding	-0.0294912
transcript_HQ_sequal2_transcript4321/f2p0/1810	1810	noncoding	-0.0110592
transcript_HQ_sequal2_transcript3366/f2p0/1828	1825	noncoding	-0.0086016
transcript_HQ_sequal2_transcript6068/f2p0/1605	1604	noncoding	-0.0155648
transcript_HQ_sequal2_transcript6982/f3p0/1493	1493	noncoding	-0.1024
transcript_HQ_sequal2_transcript2579/f2p0/2022	2022	noncoding	-0.0512
transcript_HQ_sequal2_transcript3385/f3p0/1845	1843	noncoding	-0.008192
transcript_HQ_sequal2_transcript5205/f2p0/1707	1711	noncoding	-0.0073728
transcript_HQ_sequal2_transcript5213/f3p0/1691	1691	noncoding	-0.008192
transcript_HQ_sequal2_transcript6095/f2p0/1603	1603	noncoding	-0.026624
transcript_HQ_sequal2_transcript2592/f3p0/2021	2021	noncoding	-0.0172032
transcript_HQ_sequal2_transcript2599/f2p0/2036	2036	noncoding	-0.0016384
transcript_HQ_sequal2_transcript7014/f2p0/1517	1517	noncoding	-0.0393216
transcript_HQ_sequal2_transcript3402/f3p0/1898	1898	noncoding	-0.0135168
transcript_HQ_sequal2_transcript260/f4p0/3031	3031	noncoding	-0.103219
transcript_HQ_sequal2_transcript7019/f5p0/1508	1508	noncoding	-0.012288
transcript_HQ_sequal2_transcript2605/f2p0/2018	2018	noncoding	-0.0004096
transcript_HQ_sequal2_transcript612/f2p0/2693	2693	noncoding	-0.038912
transcript_HQ_sequal2_transcript2614/f2p0/2011	2011	noncoding	-0.0303104
transcript_HQ_sequal2_transcript4374/f2p0/1816	1817	noncoding	-0.006144
transcript_HQ_sequal2_transcript6128/f21p0/1561	1561	noncoding	-0.012288
transcript_HQ_sequal2_transcript6133/f2p0/1583	1583	noncoding	-0.008192
transcript_HQ_sequal2_transcript4389/f6p0/1816	1816	noncoding	-0.0155648
transcript_HQ_sequal2_transcript3433/f6p0/1897	1894	noncoding	-0.0290816
transcript_HQ_sequal2_transcript7052/f25p0/1501	1500	noncoding	-0.012288
transcript_HQ_sequal2_transcript4397/f2p0/1776	1774	noncoding	-0.008192
transcript_HQ_sequal2_transcript7056/f2p0/1511	1511	noncoding	-0.032768
transcript_HQ_sequal2_transcript6144/f8p0/1526	1526	noncoding	-0.02048
transcript_HQ_sequal2_transcript2644/f2p0/2030	2030	noncoding	-0.057344
transcript_HQ_sequal2_transcript3455/f12p0/1922	1923	noncoding	-0.01024
transcript_HQ_sequal2_transcript5283/f3p0/1661	1661	noncoding	-0.0077824
transcript_HQ_sequal2_transcript7084/f2p0/1501	1478	noncoding	-0.0262144
transcript_HQ_sequal2_transcript442/f2p0/2832	2832	noncoding	-0.0372736
transcript_HQ_sequal2_transcript6166/f3p0/1586	1586	noncoding	-0.0270336
transcript_HQ_sequal2_transcript4421/f4p0/1781	1781	noncoding	-0.0004096
transcript_HQ_sequal2_transcript3466/f3p0/1874	1875	noncoding	-0.0438272
transcript_HQ_sequal2_transcript2668/f2p0/1987	1989	noncoding	-0.0172032
transcript_HQ_sequal2_transcript6172/f2p0/1612	1612	noncoding	-0.03072
transcript_HQ_sequal2_transcript6194/f3p0/1601	1599	noncoding	-0.0200704
transcript_HQ_sequal2_transcript2692/f2p0/2004	2006	noncoding	-0.0253952
transcript_HQ_sequal2_transcript7133/f2p0/1482	1482	noncoding	-0.0339968
transcript_HQ_sequal2_transcript7136/f2p0/1484	1484	noncoding	-0.0516096
transcript_HQ_sequal2_transcript4465/f2p0/1764	1764	noncoding	-0.0131072
transcript_HQ_sequal2_transcript5340/f6p0/1686	1686	noncoding	-0.057344
transcript_HQ_sequal2_transcript5345/f2p0/1669	1669	noncoding	-0.016384
transcript_HQ_sequal2_transcript6218/f2p0/1602	1602	noncoding	-0.0004096
transcript_HQ_sequal2_transcript7159/f3p0/1568	1556	noncoding	-0.0299008
transcript_HQ_sequal2_transcript4480/f6p0/1779	1779	noncoding	-0.0004096
transcript_HQ_sequal2_transcript4484/f2p0/1775	1778	noncoding	-0.0155648
transcript_HQ_sequal2_transcript4487/f3p0/1771	1771	noncoding	-0.0012288
transcript_HQ_sequal2_transcript4496/f2p0/1766	1767	noncoding	-0.0589824
transcript_HQ_sequal2_transcript2740/f4p0/1503	1503	noncoding	-0.0110592
transcript_HQ_sequal2_transcript7178/f2p0/1486	1486	noncoding	-0.032768
transcript_HQ_sequal2_transcript6240/f3p0/1584	1583	noncoding	-0.0118784
transcript_HQ_sequal2_transcript7201/f5p0/1476	1475	noncoding	-0.012288
transcript_HQ_sequal2_transcript4525/f2p0/1787	1785	noncoding	-0.06144
transcript_HQ_sequal2_transcript6268/f2p0/1579	1579	noncoding	-0.004096
transcript_HQ_sequal2_transcript7218/f2p0/1482	1482	noncoding	-0.008192
transcript_HQ_sequal2_transcript5420/f5p0/1666	1666	noncoding	-0.008192
transcript_HQ_sequal2_transcript7236/f4p0/1474	1474	noncoding	-0.086016
transcript_HQ_sequal2_transcript7237/f5p0/1463	1463	noncoding	-0.02048
transcript_HQ_sequal2_transcript5434/f3p0/1660	1660	noncoding	-0.036864
transcript_HQ_sequal2_transcript7246/f2p0/1556	1555	noncoding	-0.0561152
transcript_HQ_sequal2_transcript3590/f7p0/1889	1889	noncoding	-0.0237568
transcript_HQ_sequal2_transcript4559/f3p0/1752	1752	noncoding	-0.024576
transcript_HQ_sequal2_transcript3602/f2p0/1871	1871	noncoding	-0.0323584
transcript_HQ_sequal2_transcript4581/f2p0/1752	1752	noncoding	-0.0139264
transcript_HQ_sequal2_transcript5457/f3p0/1654	1654	noncoding	-0.012288
transcript_HQ_sequal2_transcript7273/f2p0/1466	1467	noncoding	-0.02048
transcript_HQ_sequal2_transcript7276/f2p0/1345	1344	noncoding	-0.0434176
transcript_HQ_sequal2_transcript3621/f2p0/1892	1892	noncoding	-0.0380928
transcript_HQ_sequal2_transcript3623/f2p0/1880	1880	noncoding	-0.188416
transcript_HQ_sequal2_transcript7280/f2p0/1484	1485	noncoding	-0.016384
transcript_HQ_sequal2_transcript5474/f3p0/1660	1660	noncoding	-0.0004096
transcript_HQ_sequal2_transcript6329/f2p0/1581	1581	noncoding	-0.0466944
transcript_HQ_sequal2_transcript7293/f2p0/1510	1504	noncoding	-0.0196608
transcript_HQ_sequal2_transcript4604/f2p0/1756	1756	noncoding	-0.049152
transcript_HQ_sequal2_transcript4608/f4p0/1763	1763	noncoding	-0.0417792
transcript_HQ_sequal2_transcript6346/f4p0/1589	1589	noncoding	-0.004096
transcript_HQ_sequal2_transcript6348/f2p0/1576	1576	noncoding	-0.0516096
transcript_HQ_sequal2_transcript7306/f2p0/1469	1469	noncoding	-0.0098304
transcript_HQ_sequal2_transcript6349/f2p0/1574	1574	noncoding	-0.0319488
transcript_HQ_sequal2_transcript6352/f2p0/1575	1575	noncoding	-0.057344
transcript_HQ_sequal2_transcript3651/f2p0/1860	1860	noncoding	-0.0278528
transcript_HQ_sequal2_transcript4622/f3p0/1795	1795	noncoding	-0.0258048
transcript_HQ_sequal2_transcript2852/f2p0/1978	1978	noncoding	-0.0004096
transcript_HQ_sequal2_transcript4624/f8p0/1749	1749	noncoding	-0.0028672
transcript_HQ_sequal2_transcript6361/f7p0/1589	1584	noncoding	-0.0049152
transcript_HQ_sequal2_transcript6370/f14p0/1569	1569	noncoding	-0.0172032
transcript_HQ_sequal2_transcript5531/f2p0/1666	1666	noncoding	-0.045056
transcript_HQ_sequal2_transcript3686/f2p0/1866	1866	noncoding	-0.0339968
transcript_HQ_sequal2_transcript6399/f2p0/1593	1593	noncoding	-0.159744
transcript_HQ_sequal2_transcript3704/f3p0/1857	1856	noncoding	-0.0335872
transcript_HQ_sequal2_transcript6420/f2p0/1565	1565	noncoding	-0.016384
transcript_HQ_sequal2_transcript6428/f5p0/1527	1527	noncoding	-0.008192
transcript_HQ_sequal2_transcript2924/f2p0/2003	2003	noncoding	-0.016384
transcript_HQ_sequal2_transcript469/f2p0/2814	2812	noncoding	-0.0192512
transcript_HQ_sequal2_transcript7399/f3p0/1457	1457	noncoding	-0.0180224
transcript_HQ_sequal2_transcript5584/f2p0/1668	1668	noncoding	-0.0004096
transcript_HQ_sequal2_transcript3733/f2p0/1842	1837	noncoding	-0.0073728
transcript_HQ_sequal2_transcript5596/f2p0/1643	1644	noncoding	-0.024576
transcript_HQ_sequal2_transcript4700/f2p0/1742	1742	noncoding	-0.0065536
transcript_HQ_sequal2_transcript742/f4p0/2611	2611	noncoding	-0.04096
transcript_HQ_sequal2_transcript7429/f2p0/1454	1454	noncoding	-0.049152
transcript_HQ_sequal2_transcript5613/f2p0/1647	1646	noncoding	-0.02048
transcript_HQ_sequal2_transcript5614/f2p0/1648	1648	noncoding	-0.002048
transcript_HQ_sequal2_transcript4723/f3p0/1759	1760	noncoding	-0.028672
transcript_HQ_sequal2_transcript2971/f4p0/1997	1997	noncoding	-0.0487424
transcript_HQ_sequal2_transcript745/f3p0/2581	2580	noncoding	-0.0294912
transcript_HQ_sequal2_transcript7457/f2p0/1480	1480	noncoding	-0.0135168
transcript_HQ_sequal2_transcript7470/f2p0/1460	1459	noncoding	-0.0188416
transcript_HQ_sequal2_transcript7475/f2p0/1457	1457	noncoding	-0.057344
transcript_HQ_sequal2_transcript3784/f12p0/1882	1882	noncoding	-0.0208896
transcript_HQ_sequal2_transcript7486/f2p0/1469	1470	noncoding	-0.073728
transcript_HQ_sequal2_transcript7489/f2p0/1410	1410	noncoding	-0.034816
transcript_HQ_sequal2_transcript3003/f3p0/1886	1886	noncoding	-0.0503808
transcript_HQ_sequal2_transcript5664/f2p0/1638	1637	noncoding	-0.0004096
transcript_HQ_sequal2_transcript6507/f2p0/1507	1501	noncoding	-0.028672
transcript_HQ_sequal2_transcript3804/f5p0/1850	1850	noncoding	-0.0196608
transcript_HQ_sequal2_transcript3806/f2p0/1843	1843	noncoding	-0.018432
transcript_HQ_sequal2_transcript3807/f2p0/1861	1861	noncoding	-0.0479232
transcript_HQ_sequal2_transcript3813/f2p0/1840	1841	noncoding	-0.0270336
transcript_HQ_sequal2_transcript5686/f10p0/1666	1665	noncoding	-0.0249856
transcript_HQ_sequal2_transcript752/f2p0/2590	2590	noncoding	-0.04096
transcript_HQ_sequal2_transcript3820/f2p0/1867	1868	noncoding	-0.0458752
transcript_HQ_sequal2_transcript4801/f2p0/1723	1723	noncoding	-0.0217088
transcript_HQ_sequal2_transcript3039/f2p0/1958	1958	noncoding	-0.0135168
transcript_HQ_sequal2_transcript6547/f3p0/1498	1499	noncoding	-0.012288
transcript_HQ_sequal2_transcript5702/f5p0/1634	1635	noncoding	-0.0667648
transcript_HQ_sequal2_transcript5704/f2p0/1641	1641	noncoding	-0.012288
transcript_HQ_sequal2_transcript4824/f2p0/1718	1718	noncoding	-0.0872448
transcript_HQ_sequal2_transcript7550/f3p0/1452	1450	noncoding	-0.0180224
transcript_HQ_sequal2_transcript3838/f4p0/1854	1854	noncoding	-0.0417792
transcript_HQ_sequal2_transcript7556/f4p0/1444	1444	noncoding	-0.008192
transcript_HQ_sequal2_transcript3060/f2p0/1961	1960	noncoding	-0.004096
transcript_HQ_sequal2_transcript4838/f2p0/1727	1727	noncoding	-0.0004096
transcript_HQ_sequal2_transcript658/f2p0/2660	2660	noncoding	-0.01024
transcript_HQ_sequal2_transcript6581/f2p0/1559	1559	noncoding	-0.036864
transcript_HQ_sequal2_transcript3074/f7p0/1942	1942	noncoding	-0.0208896
transcript_HQ_sequal2_transcript4855/f2p0/1720	1720	noncoding	-0.024576
transcript_HQ_sequal2_transcript6589/f2p0/1581	1579	noncoding	-0.0405504
transcript_HQ_sequal2_transcript6591/f2p0/1545	1545	noncoding	-0.0258048
transcript_HQ_sequal2_transcript3081/f2p0/1939	1937	noncoding	-0.026624
transcript_HQ_sequal2_transcript7596/f2p0/1437	1436	noncoding	-0.167936
transcript_HQ_sequal2_transcript3871/f5p0/1806	1808	noncoding	-0.0188416
transcript_HQ_sequal2_transcript5754/f2p0/1668	1669	noncoding	-0.0004096
transcript_HQ_sequal2_transcript7601/f5p0/1457	1456	noncoding	-0.0294912
transcript_HQ_sequal2_transcript4876/f3p0/1741	1740	noncoding	-0.0065536
transcript_HQ_sequal2_transcript5757/f2p0/1631	1631	noncoding	-0.016384
transcript_HQ_sequal2_transcript4881/f2p0/1549	1535	noncoding	-0.0229376
transcript_HQ_sequal2_transcript4884/f3p0/1720	1720	noncoding	-0.167936
transcript_HQ_sequal2_transcript3885/f2p0/1845	1845	noncoding	-0.0069632
transcript_HQ_sequal2_transcript4891/f2p0/1627	1627	noncoding	-0.016384
transcript_HQ_sequal2_transcript7626/f2p0/1442	1442	noncoding	-0.0004096
transcript_HQ_sequal2_transcript6622/f2p0/1568	1568	noncoding	-0.016384
transcript_HQ_sequal2_transcript5782/f2p0/1629	1630	noncoding	-0.034816
transcript_HQ_sequal2_transcript4905/f3p0/1773	1773	noncoding	-0.0114688
transcript_HQ_sequal2_transcript4907/f5p0/1713	1712	noncoding	-0.057344
transcript_HQ_sequal2_transcript4914/f2p0/1719	1719	noncoding	-0.006144
transcript_HQ_sequal2_transcript7648/f2p0/1440	1439	noncoding	-0.045056
transcript_HQ_sequal2_transcript4928/f2p0/1715	1715	noncoding	-0.0249856
transcript_HQ_sequal2_transcript6647/f3p0/1544	1544	noncoding	-0.0249856
transcript_HQ_sequal2_transcript7657/f7p0/1434	1434	noncoding	-0.0503808
transcript_HQ_sequal2_transcript4933/f3p0/1719	1719	noncoding	-0.0585728
transcript_HQ_sequal2_transcript6658/f2p0/1544	1536	noncoding	-0.0458752
transcript_HQ_sequal2_transcript7690/f2p0/1441	1441	noncoding	-0.0147456
transcript_HQ_sequal2_transcript6662/f4p0/1533	1533	noncoding	-0.0270336
transcript_HQ_sequal2_transcript4953/f2p0/1734	1734	noncoding	-0.0393216
transcript_HQ_sequal2_transcript6673/f2p0/1532	1532	noncoding	-0.0004096
transcript_HQ_sequal2_transcript9487/f2p0/1269	1269	noncoding	-0.0569344
transcript_HQ_sequal2_transcript7717/f2p0/1450	1450	noncoding	-0.0012288
transcript_HQ_sequal2_transcript8594/f2p0/1313	1314	noncoding	-0.104858
transcript_HQ_sequal2_transcript949/f2p0/2500	2499	noncoding	-0.0077824
transcript_HQ_sequal2_transcript9496/f2p0/1251	1251	noncoding	-0.0004096
transcript_HQ_sequal2_transcript9500/f5p0/1285	1285	noncoding	-0.0004096
transcript_HQ_sequal2_transcript7733/f2p0/1439	1437	noncoding	-0.0446464
transcript_HQ_sequal2_transcript6707/f4p0/1527	1527	noncoding	-0.047104
transcript_HQ_sequal2_transcript8611/f2p0/1334	1334	noncoding	-0.012288
transcript_HQ_sequal2_transcript7745/f3p0/1429	1429	noncoding	-0.0208896
transcript_HQ_sequal2_transcript6720/f2p0/1541	1543	noncoding	-0.0004096
transcript_HQ_sequal2_transcript6724/f2p0/1531	1531	noncoding	-0.0258048
transcript_HQ_sequal2_transcript8629/f3p0/1351	1351	noncoding	-0.02048
transcript_HQ_sequal2_transcript9534/f2p0/1248	1248	noncoding	-0.03072
transcript_HQ_sequal2_transcript8642/f2p0/1337	1337	noncoding	-0.0495616
transcript_HQ_sequal2_transcript7762/f2p0/1371	1368	noncoding	-0.0188416
transcript_HQ_sequal2_transcript3989/f4p0/1733	1733	noncoding	-0.0004096
transcript_HQ_sequal2_transcript9556/f2p0/1244	1244	noncoding	-0.032768
transcript_HQ_sequal2_transcript9569/f2p0/1239	1238	noncoding	-0.0086016
transcript_HQ_sequal2_transcript957/f4p0/2471	2471	noncoding	-0.0331776
transcript_HQ_sequal2_transcript7784/f2p0/1445	1445	noncoding	-0.016384
transcript_HQ_sequal2_transcript7785/f2p0/1465	1466	noncoding	-0.012288
transcript_HQ_sequal2_transcript8677/f3p0/1331	1331	noncoding	-0.0024576
transcript_HQ_sequal2_transcript6764/f3p0/1522	1522	noncoding	-0.0004096
transcript_HQ_sequal2_transcript9577/f2p0/1236	1236	noncoding	-0.04096
transcript_HQ_sequal2_transcript6769/f4p0/1549	1549	noncoding	-0.0172032
transcript_HQ_sequal2_transcript781/f2p0/2592	2591	noncoding	-0.0221184
transcript_HQ_sequal2_transcript4031/f3p0/1823	1823	noncoding	-0.0417792
transcript_HQ_sequal2_transcript9600/f4p0/1247	1247	noncoding	-0.008192
transcript_HQ_sequal2_transcript4035/f3p0/1815	1815	noncoding	-0.036864
transcript_HQ_sequal2_transcript404/f3p0/2844	2843	noncoding	-0.018432
transcript_HQ_sequal2_transcript8710/f2p0/1327	1328	noncoding	-0.053248
transcript_HQ_sequal2_transcript7843/f16p0/1355	1355	noncoding	-0.0098304
transcript_HQ_sequal2_transcript7869/f3p0/1411	1411	noncoding	-0.0167936
transcript_HQ_sequal2_transcript7871/f2p0/1420	1419	noncoding	-0.016384
transcript_HQ_sequal2_transcript9671/f2p0/1234	1234	noncoding	-0.0458752
transcript_HQ_sequal2_transcript7886/f2p0/1414	1414	noncoding	-0.0253952
transcript_HQ_sequal2_transcript8787/f2p0/1304	1304	noncoding	-0.024576
transcript_HQ_sequal2_transcript7895/f2p0/1412	1412	noncoding	-0.0053248
transcript_HQ_sequal2_transcript8810/f5p0/1312	1313	noncoding	-0.032768
transcript_HQ_sequal2_transcript9712/f2p0/1225	1225	noncoding	-0.0331776
transcript_HQ_sequal2_transcript9716/f2p0/1244	1244	noncoding	-0.03072
transcript_HQ_sequal2_transcript792/f2p0/2566	2566	noncoding	-0.0233472
transcript_HQ_sequal2_transcript8825/f2p0/1295	1296	noncoding	-0.022528
transcript_HQ_sequal2_transcript8831/f4p0/1319	1317	noncoding	-0.016384
transcript_HQ_sequal2_transcript9742/f3p0/1226	1226	noncoding	-0.055296
transcript_HQ_sequal2_transcript7966/f3p0/1421	1421	noncoding	-0.016384
transcript_HQ_sequal2_transcript9779/f2p0/1264	1267	noncoding	-0.134758
transcript_HQ_sequal2_transcript8876/f3p0/1315	1315	noncoding	-0.022528
transcript_HQ_sequal2_transcript9785/f3p0/1223	1223	noncoding	-0.002048
transcript_HQ_sequal2_transcript7973/f2p0/1424	1424	noncoding	-0.0077824
transcript_HQ_sequal2_transcript7979/f2p0/1402	1402	noncoding	-0.0229376
transcript_HQ_sequal2_transcript8883/f3p0/1302	1302	noncoding	-0.0098304
transcript_HQ_sequal2_transcript9803/f2p0/1235	1234	noncoding	-0.0380928
transcript_HQ_sequal2_transcript9809/f2p0/1229	1229	noncoding	-0.0135168
transcript_HQ_sequal2_transcript9818/f2p0/1239	1238	noncoding	-0.03072
transcript_HQ_sequal2_transcript8005/f2p0/1418	1418	noncoding	-0.1024
transcript_HQ_sequal2_transcript8007/f3p0/1404	1405	noncoding	-0.012288
transcript_HQ_sequal2_transcript9830/f2p0/1214	1214	noncoding	-0.0028672
transcript_HQ_sequal2_transcript893/f2p0/2526	2526	noncoding	-0.022528
transcript_HQ_sequal2_transcript8934/f2p0/1320	1317	noncoding	-0.0028672
transcript_HQ_sequal2_transcript8031/f11p0/1349	1350	noncoding	-0.0417792
transcript_HQ_sequal2_transcript8946/f3p0/1306	1306	noncoding	-0.0151552
transcript_HQ_sequal2_transcript9879/f8p0/1103	1101	noncoding	-0.0139264
transcript_HQ_sequal2_transcript8960/f2p0/1268	1263	noncoding	-0.0024576
transcript_HQ_sequal2_transcript8086/f3p0/1403	1403	noncoding	-0.0053248
transcript_HQ_sequal2_transcript9903/f2p0/1208	1208	noncoding	-0.12288
transcript_HQ_sequal2_transcript8996/f3p0/1311	1310	noncoding	-0.0077824
transcript_HQ_sequal2_transcript9005/f7p0/1296	1296	noncoding	-0.0126976
transcript_HQ_sequal2_transcript9006/f8p0/1300	1300	noncoding	-0.0159744
transcript_HQ_sequal2_transcript9931/f2p0/1209	1209	noncoding	-0.0475136
transcript_HQ_sequal2_transcript901/f2p0/2508	2509	noncoding	-0.0004096
transcript_HQ_sequal2_transcript9943/f2p0/1213	1210	noncoding	-0.0155648
transcript_HQ_sequal2_transcript8126/f2p0/1392	1392	noncoding	-0.0344064
transcript_HQ_sequal2_transcript9948/f6p0/1220	1219	noncoding	-0.0188416
transcript_HQ_sequal2_transcript9026/f2p0/1297	1297	noncoding	-0.01024
transcript_HQ_sequal2_transcript9039/f2p0/1291	1291	noncoding	-0.008192
transcript_HQ_sequal2_transcript9973/f2p0/1213	1213	noncoding	-0.032768
transcript_HQ_sequal2_transcript9974/f2p0/1205	1205	noncoding	-0.057344
transcript_HQ_sequal2_transcript9063/f2p0/1312	1313	noncoding	-0.088064
transcript_HQ_sequal2_transcript9074/f2p0/1210	1201	noncoding	-0.02048
transcript_HQ_sequal2_transcript8181/f7p0/1389	1389	noncoding	-0.0004096
transcript_HQ_sequal2_transcript8188/f2p0/1379	1379	noncoding	-0.008192
transcript_HQ_sequal2_transcript9097/f5p0/1298	1298	noncoding	-0.0417792
transcript_HQ_sequal2_transcript8203/f2p0/1369	1369	noncoding	-0.0196608
transcript_HQ_sequal2_transcript823/f2p0/2546	2545	noncoding	-0.0090112
transcript_HQ_sequal2_transcript8242/f4p0/1405	1405	noncoding	-0.0012288
transcript_HQ_sequal2_transcript9157/f4p0/1282	1282	noncoding	-0.028672
transcript_HQ_sequal2_transcript8269/f2p0/1381	1380	noncoding	-0.043008
transcript_LQ_sequal2_transcript11189/f2p0/1170	1160	noncoding	-0.0335872
transcript_HQ_sequal2_transcript9192/f2p0/1181	1134	noncoding	-0.14336
transcript_HQ_sequal2_transcript8316/f2p0/1375	1373	noncoding	-0.0180224
transcript_HQ_sequal2_transcript9218/f11p0/1251	1251	noncoding	-0.0004096
transcript_HQ_sequal2_transcript8358/f2p0/1361	1360	noncoding	-0.06144
transcript_LQ_sequal2_transcript12265/f2p0/922	907	noncoding	-0.024576
transcript_HQ_sequal2_transcript9273/f2p0/1281	1281	noncoding	-0.0131072
transcript_LQ_sequal2_transcript12497/f2p0/990	991	noncoding	-0.016384
transcript_LQ_sequal2_transcript12767/f2p0/1004	1004	noncoding	-0.0073728
transcript_HQ_sequal2_transcript9281/f2p0/1261	1261	noncoding	-0.151552
transcript_HQ_sequal2_transcript9284/f2p0/1275	1275	noncoding	-0.0262144
transcript_HQ_sequal2_transcript9287/f3p0/1300	1300	noncoding	-0.155648
transcript_HQ_sequal2_transcript8396/f2p0/1369	1369	noncoding	-0.0036864
transcript_HQ_sequal2_transcript9297/f5p0/1268	1268	noncoding	-0.049152
transcript_HQ_sequal2_transcript93/f2p0/3484	3478	noncoding	-0.0192512
transcript_LQ_sequal2_transcript13807/f2p0/918	915	noncoding	-0.0004096
transcript_HQ_sequal2_transcript8422/f5p0/1351	1351	noncoding	-0.0004096
transcript_HQ_sequal2_transcript933/f3p0/2512	2512	noncoding	-0.024576
transcript_HQ_sequal2_transcript8437/f4p0/1337	1337	noncoding	-0.0380928
transcript_HQ_sequal2_transcript8441/f2p0/1356	1363	noncoding	-0.0172032
transcript_HQ_sequal2_transcript9343/f2p0/1264	1264	noncoding	-0.004096
transcript_HQ_sequal2_transcript8444/f2p0/1349	1349	noncoding	-0.0475136
transcript_HQ_sequal2_transcript9346/f5p0/1263	1263	noncoding	-0.0380928
transcript_HQ_sequal2_transcript9356/f2p0/1269	1268	noncoding	-0.06144
transcript_HQ_sequal2_transcript8467/f2p0/1364	1363	noncoding	-0.012288
transcript_LQ_sequal2_transcript14510/f2p0/796	785	noncoding	-0.0536576
transcript_HQ_sequal2_transcript8478/f3p0/1358	1358	noncoding	-0.04096
transcript_LQ_sequal2_transcript14536/f3p0/801	730	noncoding	-0.0253952
transcript_HQ_sequal2_transcript9399/f2p0/1255	1255	noncoding	-0.012288
transcript_HQ_sequal2_transcript9406/f7p0/1277	1277	noncoding	-0.0004096
transcript_HQ_sequal2_transcript8505/f2p0/1356	1357	noncoding	-0.008192
transcript_HQ_sequal2_transcript9416/f11p0/1263	1263	noncoding	-0.008192
transcript_HQ_sequal2_transcript8517/f2p0/1349	1349	noncoding	-0.012288
transcript_HQ_sequal2_transcript8533/f2p0/1374	1373	noncoding	-0.0053248
transcript_HQ_sequal2_transcript8549/f3p0/1343	1343	noncoding	-0.0077824
transcript_HQ_sequal2_transcript945/f2p0/2481	2481	noncoding	-0.004096
transcript_LQ_sequal2_transcript15009/f2p0/825	817	noncoding	-0.16384
transcript_HQ_sequal2_transcript9477/f2p0/1255	1255	noncoding	-0.0004096
transcript_LQ_sequal2_transcript15080/f2p0/775	774	noncoding	-0.045056
transcript_HQ_sequal2_transcript9485/f2p0/1245	1243	noncoding	-0.0536576
transcript_LQ_sequal2_transcript15122/f2p0/780	769	noncoding	-0.0106496
transcript_LQ_sequal2_transcript15431/f2p0/772	743	noncoding	-0.04096
transcript_LQ_sequal2_transcript15644/f2p0/799	764	noncoding	-0.0270336
transcript_LQ_sequal2_transcript16193/f3p0/730	731	noncoding	-0.0217088
transcript_LQ_sequal2_transcript16918/f2p0/620	608	noncoding	-0.0004096
transcript_LQ_sequal2_transcript17096/f2p0/596	594	noncoding	-0.069632
transcript_LQ_sequal2_transcript17372/f3p0/597	597	noncoding	-0.0004096
transcript_LQ_sequal2_transcript17448/f2p0/641	637	noncoding	-0.0004096
transcript_LQ_sequal2_transcript17662/f2p0/575	574	noncoding	-0.0249856
transcript_LQ_sequal2_transcript18094/f2p0/551	501	noncoding	-0.0004096
transcript_LQ_sequal2_transcript18709/f3p0/523	520	noncoding	-0.114688
transcript_LQ_sequal2_transcript19429/f2p0/451	442	noncoding	-0.04096
transcript_LQ_sequal2_transcript19561/f8p0/416	416	noncoding	-0.167936
transcript_LQ_sequal2_transcript1957/f2p0/2079	2054	noncoding	-0.0151552
transcript_LQ_sequal2_transcript19704/f2p0/463	459	noncoding	-0.06144
transcript_LQ_sequal2_transcript19768/f2p0/450	430	noncoding	-0.028672
transcript_LQ_sequal2_transcript19888/f2p0/466	422	noncoding	-0.114688
transcript_LQ_sequal2_transcript20088/f2p0/426	424	noncoding	-0.0155648
transcript_LQ_sequal2_transcript20107/f3p0/413	410	noncoding	-0.0004096
transcript_LQ_sequal2_transcript20112/f5p0/412	412	noncoding	-0.07168
transcript_LQ_sequal2_transcript20893/f2p0/332	323	noncoding	-0.0004096
transcript_LQ_sequal2_transcript20926/f2p0/316	313	noncoding	-0.0004096
transcript_LQ_sequal2_transcript21048/f2p0/304	305	noncoding	-0.0004096
transcript_LQ_sequal2_transcript21253/f3p0/296	296	noncoding	-0.0004096
transcript_LQ_sequal2_transcript21723/f2p0/160	157	noncoding	-0.0004096
transcript_LQ_sequal2_transcript4663/f2p0/1698	1591	noncoding	-0.0299008
transcript_LQ_sequal2_transcript9057/f2p0/1342	1333	noncoding	-0.012288
