# Supplementary material for: Regulatory mechanisms of fatty acids biosynthesis in Armeniaca sibirica seed kernel oil at different developmental stages
Source: PeerJ. 2022 Oct 4;10:e14125. doi: 10.7717/peerj.14125 (PMC9541615; doi:10.7717/peerj.14125)
Supplement: Supplemental Information 19 [file peerj-10-14125-s019.xlsx]

## Sheet: Sheet1
Table S19 Overview of the differentially expressed lncRNAs co-expressed with the major lipid-related genes in Armeniaca sibirica seed kernels.
DEG_LncRNA ID	FPKM values					The raw data for FPKM values
	SⅠ	SⅡ	SⅢ	SⅣ	SⅤ	SⅠ-1	SⅠ-2	SⅠ-3	SⅡ-1	SⅡ-2	SⅡ-3	SⅢ-1	SⅢ-2	SⅢ-3	SⅣ-1	SⅣ-2	SⅣ-3	SⅤ-1	SⅤ-2	SⅤ-3
transcript_HQ_sequal2_transcript17778/f33p0/574	303.84	126.18	439.01	3061.6	4521.3	326.55	313.26	271.71	128.35	120.83	129.36	457.68	423.9	435.45	3151.47	3136.31	2897.02	4540.64	4177.11	4846.15
transcript_HQ_sequal2_transcript21302/f4p0/274	0	146.587	532.093	1095.95	1557.99	0	0	0	140.13	125.07	174.56	583.84	545.38	467.06	1068.13	1112.28	1107.43	1676.03	1442.21	1555.74
transcript_LQ_sequal2_transcript19561/f8p0/416	0.253333	530.5	700.25	403.81	114.877	0.76	0	0	531.18	516.43	543.89	614.19	691.36	795.2	456.69	405.21	349.53	125.72	102.39	116.52
transcript_HQ_sequal2_transcript8478/f3p0/1358	26.0467	85.74	19.7433	2.99	0.4	23.33	28.74	26.07	93	91.34	72.88	20.03	18.32	20.88	3.75	2.78	2.44	0.33	0.54	0.33
transcript_HQ_sequal2_transcript16262/f4p0/708	0.57	3.51333	5.62333	38.98	180.197	0.38	0.93	0.4	3.46	5.01	2.07	6.92	4.57	5.38	40.48	39.99	36.47	173.77	181.69	185.13
transcript_HQ_sequal2_transcript17348/f2p0/632	192.583	812.35	1904.79	1596.36	204.93	198.38	185.95	193.42	879.91	848.51	708.63	1900.63	1747.03	2066.71	1643.98	1558.83	1586.26	197.42	220.49	196.88
transcript_HQ_sequal2_transcript14209/f2p0/848	40.86	9.53333	2.29667	0.573333	0	42.51	40.52	39.55	10.18	11.63	6.79	1.87	3.01	2.01	0.68	0.6	0.44	0	0	0
transcript_HQ_sequal2_transcript18704/f2p0/517	0	1.77667	22.88	74.7767	135.77	0	0	0	1.15	2.01	2.17	17.4	27.89	23.35	77.03	69.1	78.2	135.61	130.44	141.26
transcript_HQ_sequal2_transcript19097/f8p0/478	0.286667	4.02333	17.06	87.6333	141.64	0	0	0.86	4.1	4.97	3	16.57	21.63	12.98	91.4	81.6	89.9	135.79	152.39	136.74
transcript_HQ_sequal2_transcript17761/f27p0/562	0	11.5567	87.5	530.427	923.26	0	0	0	11.96	10.02	12.69	88.86	79.21	94.43	585.2	528.78	477.3	1001.38	868.19	900.21
transcript_HQ_sequal2_transcript19910/f9p0/416	0.386667	5.54	68.77	795.207	1761.83	0.76	0	0.4	8.26	2.84	5.52	78.98	60.57	66.76	848.35	750.84	786.43	1877.17	1638.41	1769.9
transcript_HQ_sequal2_transcript19457/f9p0/454	144.837	60.14	21.1167	11.8567	2.67333	131.51	163.86	139.14	59.26	67.46	53.7	19.25	15.74	28.36	13.63	9.8	12.14	3.75	4	0.27
transcript_HQ_sequal2_transcript16899/f5p0/649	245.983	84.81	30.9067	6.69	0.606667	252.73	240.88	244.34	92.46	78.38	83.59	30.64	31.08	31	5.04	8.61	6.42	0.66	0.63	0.53
Three biological replicates were performed for each developmental stage
