# Supplementary material for: Regulatory mechanisms of fatty acids biosynthesis in Armeniaca sibirica seed kernel oil at different developmental stages
Source: PeerJ. 2022 Oct 4;10:e14125. doi: 10.7717/peerj.14125 (PMC9541615; doi:10.7717/peerj.14125)
Supplement: Supplemental Information 20 [file peerj-10-14125-s020.xlsx]

## Sheet: Sheet1
Table_S20 The Ct value of sample
Raw data of Ct value
	Target gene	Reference Gene		Target gene
developmental stages	Ct value	Ct value	2-▲▲Ct	FPKM
	MAT	18SrRNA	MAT	MAT
SⅠ	26.96	8.28	1	79.3967
SⅡ	26.26	8.23	1.56917	110.963
SⅢ	26.7	8.33	1.23971	56.03
SⅣ	26.84	8.28	1.08673	48.7233
SⅤ	29.86	8.24	0.130308	9.61667
	KASⅠ-2	18SrRNA	KASⅠ-2	KASⅠ-2
SⅠ	26.93	8.28	1	34.9533
SⅡ	26.77	8.23	1.07923	64.3867
SⅢ	27.23	8.33	0.840896	23.8667
SⅣ	27.26	8.28	0.795536	5.98667
SⅤ	27.45	8.24	0.678302	0.413333
	HAD	18SrRNA	HAD	HAD
SⅠ	23.05	8.18	1	124.957
SⅡ	24	8.23	0.535887	114.963
SⅢ	25.47	8.33	0.20733	43.88
SⅣ	25.52	8.28	0.193446	40.7233
SⅤ	26.61	8.74	0.125	25.31
	EAR	18SrRNA	EAR	EAR
SⅠ	22.33	8.18	1	102.417
SⅡ	22.23	8.23	1.10957	156.48
SⅢ	24.37	8.33	0.269807	62.17
SⅣ	25.22	8.28	0.144586	39.1133
SⅤ	38.09	8.74	2.65671e-05	4.70333
	FATB	18SrRNA	FATB	FATB
SⅠ	24.73	8.18	1	62.4467
SⅡ	25.82	8.23	0.486327	17.4867
SⅢ	26.34	8.33	0.363493	7.33667
SⅣ	27.23	8.28	0.189465	7.81333
SⅤ	25.44	8.74	0.90125	17.2233
	SAD6	18SrRNA	SAD6	SAD6
SⅠ	25.93	8.28	1	3.54333
SⅡ	25.4	8.23	1.39474	323.903
SⅢ	25.27	8.33	1.6358	655.383
SⅣ	25.64	8.28	1.22264	638.263
SⅤ	26.66	8.24	0.586417	47.26
	FATA	18SrRNA	FATA	FATA
SⅠ	23.24	8.18	1	50.5067
SⅡ	23.09	8.23	1.1487	81.6367
SⅢ	24.85	8.33	0.363493	39.19
SⅣ	25.41	8.28	0.238159	24.06
SⅤ	30.39	8.74	0.0103804	3.86667
	FAD2	18SrRNA	FAD2	FAD2
SⅠ	23.56	8.18	1	146.35
SⅡ	23.16	8.23	1.36604	301.607
SⅢ	23.22	8.33	1.40444	306.473
SⅣ	23.23	8.28	1.34723	320.713
SⅤ	26.04	8.74	0.264255	83.7433
